# Supplementary material for: Association of serum uric acid, morning home blood pressure and cardiovascular risk factors in a population with previous prehypertension: a cross-sectional study
Source: PubMed Central journal article supplement — BMJ Open. 2020 Sep 9;10(9):e038046. doi: 10.1136/bmjopen-2020-038046 (PMC7482459; doi:10.1136/bmjopen-2020-038046), 2020-09-09
Supplement: bmjopen-2020-038046.draft_revisions.pdf [file bmjopen-2020-038046.draft_revisions.pdf]

# BMJ Open

BMJ Open is committed to open peer review. As part of this commitment we make the peer review history of every article we publish publicly available.

When an article is published we post the peer reviewers' comments and the authors' responses online. We also post the versions of the paper that were used during peer review. These are the versions that the peer review comments apply to.

The versions of the paper that follow are the versions that were submitted during the peer review process. They are not the versions of record or the final published versions. They should not be cited or distributed as the published version of this manuscript.

BMJ Open is an open access journal and the full, final, typeset and author-corrected version of record of the manuscript is available on our site with no access controls, subscription charges or pay-per-view fees (<http://bmjopen.bmj.com>).

If you have any questions on BMJ Open's open peer review process please email [info.bmjopen@bmj.com](mailto:info.bmjopen@bmj.com)

# BMJ Open

## Correlation of Serum Uric Acid, Morning Home Blood Pressure and Cardiovascular Risk Factors over 10 Years in a Prehypertensive Population

|                               |                                                                                                                                                                                                                                                                                                                                                                                                                                                                                                                                                                                                                                                                                        |
|-------------------------------|----------------------------------------------------------------------------------------------------------------------------------------------------------------------------------------------------------------------------------------------------------------------------------------------------------------------------------------------------------------------------------------------------------------------------------------------------------------------------------------------------------------------------------------------------------------------------------------------------------------------------------------------------------------------------------------|
| Journal:                      | <i>BMJ Open</i>                                                                                                                                                                                                                                                                                                                                                                                                                                                                                                                                                                                                                                                                        |
| Manuscript ID                 | bmjopen-2020-038046                                                                                                                                                                                                                                                                                                                                                                                                                                                                                                                                                                                                                                                                    |
| Article Type:                 | Original research                                                                                                                                                                                                                                                                                                                                                                                                                                                                                                                                                                                                                                                                      |
| Date Submitted by the Author: | 25-Feb-2020                                                                                                                                                                                                                                                                                                                                                                                                                                                                                                                                                                                                                                                                            |
| Complete List of Authors:     | Bawazier, Lucky ; Universitas Indonesia, Department of Internal Medicine, Faculty of Medicine<br>Sja'bani, Mochammad; Universitas Gadjah Mada, Mlati Study, Department of Internal Medicine, Faculty of Medicine, Public Health and Nursing<br>Irijanto, Fredie; DR. Soeradji Tirtonegoro Hospital<br>Zulaela, Zulaela; Universitas Gadjah Mada, Faculty of Mathematics and Natural Sciences<br>Widiatmoko, Agus; Universitas Muhammadiyah Yogyakarta, Department of Internal Medicine, Faculty of Medicine and Health Sciences<br>Kholiq, Abdul; Universitas Muhammadiyah Yogyakarta, Faculty of Medicine and Health Sciences<br>Tomino, Yasuhiko; Medical Corporation Group Showakai |
| Keywords:                     | Hypertension < CARDIOLOGY, Epidemiology < TROPICAL MEDICINE, PUBLIC HEALTH                                                                                                                                                                                                                                                                                                                                                                                                                                                                                                                                                                                                             |
|                               |                                                                                                                                                                                                                                                                                                                                                                                                                                                                                                                                                                                                                                                                                        |

SCHOLARONE™  
Manuscripts

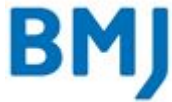

I, the Submitting Author has the right to grant and does grant on behalf of all authors of the Work (as defined in the below author licence), an exclusive licence and/or a non-exclusive licence for contributions from authors who are: i) UK Crown employees; ii) where BMJ has agreed a CC-BY licence shall apply, and/or iii) in accordance with the terms applicable for US Federal Government officers or employees acting as part of their official duties; on a worldwide, perpetual, irrevocable, royalty-free basis to BMJ Publishing Group Ltd ("BMJ") its licensees and where the relevant Journal is co-owned by BMJ to the co-owners of the Journal, to publish the Work in this journal and any other BMJ products and to exploit all rights, as set out in our [licence](#).

The Submitting Author accepts and understands that any supply made under these terms is made by BMJ to the Submitting Author unless you are acting as an employee on behalf of your employer or a postgraduate student of an affiliated institution which is paying any applicable article publishing charge ("APC") for Open Access articles. Where the Submitting Author wishes to make the Work available on an Open Access basis (and intends to pay the relevant APC), the terms of reuse of such Open Access shall be governed by a Creative Commons licence – details of these licences and which [Creative Commons](#) licence will apply to this Work are set out in our licence referred to above.

Other than as permitted in any relevant BMJ Author's Self Archiving Policies, I confirm this Work has not been accepted for publication elsewhere, is not being considered for publication elsewhere and does not duplicate material already published. I confirm all authors consent to publication of this Work and authorise the granting of this licence.

1  
2  
3 1 **CORRELATION OF SERUM URIC ACID, MORNING HOME BLOOD PRESSURE**  
4  
5 2 **AND CARDIOVASCULAR RISK FACTORS OVER 10 YEARS**  
6  
7 3 **IN A PREHYPERTENSIVE POPULATION**  
8  
9  
10 4

11  
12 5 **Lucky A Bawazier<sup>1,2</sup>, Mochammad Sja'bani<sup>1</sup>, Freddie Irijanto<sup>1,3</sup>, Zulaela<sup>1,4</sup>, Agus**  
13  
14 6 **Widiatmoko<sup>1,5</sup>, Abdul Kholiq<sup>1,6</sup>, Yasuhiko Tomino<sup>7</sup>**  
15  
16  
17 7

18  
19 8 <sup>1</sup> Mlati Study Group, Department of Internal Medicine, Faculty of Medicine, Public Health and Nursing,  
20  
21 9 Universitas Gadjah Mada, Yogyakarta, Indonesia

22  
23 10 <sup>2</sup> Department of Internal Medicine, Faculty of Medicine, Universitas Indonesia, Jakarta, Indonesia

24  
25 11 <sup>3</sup> Dr. Soeradji Tirtonegoro General Hospital, Klaten, Central Java, Indonesia

26  
27 12 <sup>4</sup> Department of Mathematics, Faculty of Mathematics and Natural Sciences, Universitas Gadjah Mada,  
28  
29 13 Yogyakarta, Indonesia

30  
31 14 <sup>5</sup> Department of Internal Medicine, Faculty of Medicine, Universitas Muhammadiyah Yogyakarta, Yogyakarta,  
32  
33 15 Indonesia

34  
35 16 <sup>6</sup> Faculty of Medicine, Universitas Muhammadiyah Yogyakarta, Yogyakarta, Indonesia

36  
37 17 <sup>7</sup> Medical Corporation SHOWAKAI, Tokyo, Japan  
38  
39 18

40  
41 19 **Correspondence:**

42  
43 20 Name : Mochammad Sja'bani

44  
45 21 Address : Perumahan Nandan Griya Idaman, Jalan Nandan Baru 19A Sleman,  
46  
47 22 Yogyakarta 55284, Indonesia

48  
49 23 Telephone : +62811282830

50  
51 24 Fax : +62274 625225

52  
53 25 Email : msbani\_jogja@yahoo.com  
54  
55  
56  
57 26

58  
59 27 **Word count: 3153**  
60

**ABSTRACT**

**Objective:** To investigate significant changes, mainly in serum uric acid levels, blood pressure and cardiovascular risk factors, that occurred over 10 years in the epidemiological data of a target group of prehypertensive patients.

**Design:** cross-sectional cohort study

**Setting:** Mlati Sub-district, Sleman District, Yogyakarta Province, Indonesia

**Participants:** Prehypertension population dataset (n=4190) were used from the 2007 “Mlati Study Database”. A total of 733 patients were selected by simple random sampling using statistical software. Subjects had both physical and laboratory examinations.

**Outcome measures:** Morning home blood pressure and laboratory examination of urine (uric acid excretion and creatinine) and blood samples (SUA, blood urea nitrogen, creatinine, a lipid profile (total cholesterol, low density lipoprotein/LDL-C, high density lipoprotein/HDL-C and triglycerides), and fasting blood glucose levels)

**Results:** Serum uric acid levels were significantly higher in men than in women (5.78 (1.25) mg/dL vs 4.52 (1.10) mg/dL,  $p<0.001$ ). Furthermore, men tended to have high-normal and high serum uric acid levels compared to women ( $p<0.001$ , RR=2.60). High-normal and high serum uric acid levels were significantly associated with prehypertension and hypertension only in women ( $p=0.001$ , RR=1.21). Body mass index was found to be significantly associated with blood pressure in the sample group. Fasting blood glucose was significantly associated with systolic blood pressure in men and with systolic and diastolic blood pressure in women; meanwhile, serum uric acid was significantly associated with blood pressure only in women.

**Conclusion:** We concluded that serum uric acid levels were significantly associated with prehypertension and hypertension only in women. Here, blood pressure was associated with

1  
2  
3 52 body mass index, fasting blood glucose, and serum uric acid levels, whereas in men, blood  
4  
5 53 pressure was only associated with body mass index and fasting blood glucose.  
6  
7  
8 54

9  
10 55 **Keywords:** blood pressure, serum uric acid, cardiovascular risk factor, gender differences  
11  
12 56

## 13 14 15 57 **STRENGTH AND LIMITATION OF THIS STUDY**

- 16  
17 58 • This study followed up the changes of blood pressure on subjects for over 10 years.  
18  
19 59 • The association between serum uric acid, blood pressure, and cardiovascular risk factors  
20  
21 60 were analyzed based on gender.  
22  
23  
24 61 • The analysis' were also performed by using both JNC 7 and 2017 ACC/AHA guideline.  
25  
26 62 • This study could not present the changes of all measured value over 10 year period  
27  
28 63 because in the prior study in 2007, these laboratory value were not examined, except for  
29  
30 64 blood pressure.  
31  
32  
33 65

## 66 INTRODUCTION

67 Hypertension is still a major problem worldwide, as reflected by a meta-analysis report  
68 in 2016 stating that in 2010, 40% of the world's population was hypertensive and that  
69 approximately 17 million people worldwide died due to hypertension.[1] In Indonesia, the  
70 prevalence of hypertension in 2013 was 25.8%, based on the Indonesian Ministry of Health  
71 report.[2] Therefore, it is important to facilitate the early recognition and treatment of  
72 hypertension and its possible effects. This study was important due to its cohort design, such  
73 that patients were followed for 10 years. Patients with prehypertension were hypothesized to  
74 eventually become hypertensive after 10 years and thus have a poorer quality of life. During  
75 the last two decades, it has been repeatedly published that the incidence of hypertension is  
76 associated with even moderate increases in levels of serum uric acid (SUA) and an increased  
77 risk of cardiovascular diseases (CVD).[3,4] The Framingham Heart Study reported an  
78 increased risk of blood pressure (BP) progression in 3157 subjects with hyperuricaemia. SUA  
79 was positively associated with increases in both systolic blood pressure (SBP) and diastolic  
80 blood pressure (DBP) after 4 years with no antihypertensive treatment.[5] Current findings  
81 based on a large-scale cohort study suggested that uric acid is a predictive factor of the  
82 development of prehypertension in adults.[6] A meta-analysis by Jiang *et al.* indicated that  
83 SUA was possibly associated with prehypertension but still found conflicting results.[7] The  
84 associations among SUA, hypertension, cardiovascular risk factors and gender remain  
85 controversial.[8, 9] Therefore, this study was conducted as a cohort study of ten years of  
86 follow-up (2007–2017) in a population with homogenous characteristics in the Mlati  
87 Subdistrict, Sleman District, Yogyakarta, Java Island, Indonesia. The aim of this study was to  
88 observe the progression from prehypertension to hypertension after 10 years of follow-up and  
89 its association with SUA as well as other cardiovascular risk factors. We hypothesized that at

1  
2  
3 90 least 30% of prehypertensive patients will eventually develop hypertension and that it is  
4  
5 91 associated with SUA.  
6  
7  
8 92

## 93 **METHODS**

### 94 ***Study Design***

95 This study was a cross-sectional cohort study conducted in Mlati Sub-district, Sleman  
96 District in the Yogyakarta Special Region, Indonesia. The protocol of this study was approved by  
97 Medical and Health Research Ethics Committee of Faculty of Medicine, Public Health and Nursing,  
98 Universitas Gadjah Mada, Yogyakarta, Indonesia with the ID approval of KE/FK/0961/EC/2017.

### 99 ***Study Population***

100 We pooled data from participants enrolled in the 2007 Mlati Study Database. The  
101 sample of the Mlati Study included 12,073 people aged 20–69 years who lived in 3 villages in  
102 Mlati (Tirtoadi, Sumberadi, and Tlogoadi), Sleman, Yogyakarta, Indonesia. The inclusion  
103 criteria for the prehypertensive subgroup of the study sample were negative proteinuria,  
104 negative urine reduction, and age between 20 and 49 years; this subgroup included 4,190  
105 participants (current age was 30–59 years). In 2017, of the 4,190 individuals with a history of  
106 prehypertension in 2007, 1500 subjects were selected as participants in the current study by simple  
107 random sampling using statistical software. All 1500 subjects were invited to have a physical and  
108 laboratory examination; however, only 733 subjects who participated in the sampling were examined  
109 (the other subjects who did not show up during the laboratory examination were due to the change of  
110 residential area or death or any other unknown reasons). All subjects provided informed consent at  
111 the beginning of the study.

### 112 ***Patient and Public Involvement***

113 Patient were not involved in any of the design, analysis, and presentation of the study results.

### 114 ***Data Collection***



1  
2  
3 115 The data collection was conducted twice during the study period. The first data  
4  
5 116 collection was conducted in 2007 to collect the prehypertension population (n=4,190). The  
6  
7  
8 117 second data collection was performed in 2017 to collect samples from the Mlati Study Database  
9  
10 118 by the random sampling method (n=733).

12 119 In 2007, interviews were conducted on 12,073 subjects to obtain family history and to  
13  
14 120 perform physical and laboratory examinations. Physical examinations, which included  
15  
16  
17 121 measurements of morning home BP, body weight, body height, upper-hand circumference,  
18  
19 122 wrist circumference, abdominal circumference and hip circumference, were conducted on day  
20  
21 123 1. On day 2, we examined morning home BP and took urine and blood samples.

24 124 In 2017, we collected data from 733 subjects, including physical and laboratory  
25  
26 125 examinations. On the first day, subjects were interviewed, physically examined, and given  
27  
28 126 urine containers for one-time urine samples as well as for a 24-h urine collection that had to be  
29  
30  
31 127 submitted on day 2. The physical examination consisted of a morning home BP measurement  
32  
33 128 using the Omron HEM-907 monitor (digital automatic blood pressure monitoring) and  
34  
35 129 measurements of body weight, body height, upper-hand circumference, wrist circumference,  
36  
37  
38 130 abdominal circumference and hip circumference. On the second day, subjects came while  
39  
40 131 fasting and were physically examined for BP again. Urine and blood samples were examined  
41  
42 132 in the laboratory (Prodia Laboratory, Yogyakarta, Indonesia). A 24-h urine sample was  
43  
44 133 collected to measure uric acid excretion and creatinine, and a blood sample was collected to  
45  
46  
47 134 measure SUA, blood urea nitrogen, creatinine, a lipid profile (total cholesterol, low density  
48  
49 135 lipoprotein/LDL-C, high density lipoprotein/HDL-C and triglycerides), and fasting blood  
50  
51 136 glucose levels.

### 54 137 ***Definition of Prehypertension and Hypertension***

56 138 The definitions of prehypertension and hypertension were based on the Seventh Report  
57  
58 139 of Joint National Committee (JNC 7) because the newer JNC 8 report renewed only their  
59  
60

1  
2  
3 140 treatment targets, not their classifications. The SBP of 120–139 mmHg and/or DBP of 80–89  
4  
5 141 mmHg are defined as prehypertension, while SBP of  $\geq 140$  mmHg and/or DBP of  $\geq 90$  mmHg  
6  
7  
8 142 are defined as hypertension.[10]  
9

10 143 For further analysis, we applied the 2017 ACC/AHA guideline, which classifies BP as  
11  
12 144 follows: (1) normal BP = SBP  $< 120$  mmHg and DBP  $< 80$  mmHg, (2) elevated BP = SBP 120-  
13  
14 145 129 mmHg and DBP  $< 80$  mmHg, (3) stage 1 hypertension = SBP 130-139 mmHg or DBP 80-  
15  
16 146 89 mmHg, and (4) stage 2 hypertension = SBP  $\geq 140$  mmHg or DBP  $\geq 90$  mmHg.[11]  
17  
18

### 19 147 ***Serum Uric Acid Cut-off Point***

20  
21 148 Based on the study by Sja'bani (2014), the cut-off point of SUA was divided into 3  
22  
23 149 categories: normal ( $< 5$  mg/dL), high-normal (5–7 mg/dL), and high ( $\geq 7$  mg/dL).[12]  
24  
25

### 26 150 ***Statistical Analysis***

27  
28 151 The data consisted of continuous and categorical data, which were expressed as the  
29  
30 152 mean (SD) for continuous data and as numbers and percentages for categorical data. The  
31  
32 153 continuous variables were analysed and compared by independent samples t-tests and  
33  
34 154 nonparametric Mann-Whitney U tests. The categorical variables were analysed and compared  
35  
36 155 by Pearson chi-square tests. Multivariable analysis was performed using multiple linear  
37  
38 156 regression. The significance of associations between categorical variables and numerical  
39  
40 157 variables were determined using 95% confidence intervals (CIs).  
41  
42  
43  
44  
45  
46  
47  
48  
49  
50  
51  
52  
53  
54  
55  
56  
57  
58  
59  
60

158 **RESULTS****Table 1.** Characteristic of Subjects by Gender Presented in Mean (SD)

| Variables                     | Men<br>n=306 | Women<br>n=427 | p-value |
|-------------------------------|--------------|----------------|---------|
| Age (years)                   | 46 (7.71)    | 46 (7.76)      | 0.431   |
| 30 – 39 years                 | 35 (2.86)    | 36(2.63)       | 0.093   |
| 40 – 49 years                 | 45 (2.89)    | 45 (2.67)      | 0.372   |
| 50 – 59 years                 | 54 (3.18)    | 54 (2.77)      | 0.779   |
| BMI (kg/m <sup>2</sup> )      | 23.5 (3.70)  | 25.7 (4.81)    | <0.001* |
| SBP (mmHg)                    | 132 (17.26)  | 134 (21.62)    | 0.595   |
| DBP (mmHg)                    | 78 (11.96)   | 79 (12.32)     | 0.091   |
| Uric Acid (mg/dL)             | 5.8 (1.25)   | 4.5 (1.10)     | <0.001* |
| Total cholesterol (mg/dL)     | 167 (36.86)  | 166 (41.59)    | 0.559   |
| LDL (mg/dL)                   | 109 (29.59)  | 106 (33.27)    | 0.155   |
| HDL (mg/dL)                   | 41 (10.02)   | 47 (12.20)     | <0.001* |
| Triglyceride (mg/dL)          | 129 (79.09)  | 103 (63.84)    | <0.001* |
| Fasting Blood Glucose (mg/dL) | 100 (37.22)  | 97 (33.70)     | 0.101   |

\*Significant (p&lt;0.05)

159

160 The subjects of this study consisted of 733 adults (aged 30–59 years) living in the Mlati  
 161 Subdistrict; 306 (41.75%) and 427 (58.25%) were men and women, respectively. The  
 162 characteristics of the subjects (by gender) are presented in Table 1. There was no significant  
 163 difference in age, SBP, DBP, total cholesterol, low density lipoprotein (LDL) and fasting blood  
 164 glucose between men and women (p>0.05). Significant differences were found in body mass  
 165 index (BMI) (p<0.001), SUA levels (p<0.001), high density lipoprotein (HDL) (p<0.001) and  
 166 triglycerides (p<0.001). BMI and HDL were significantly higher in women, whereas SUA  
 167 levels and triglycerides were significantly higher in men.

168 After 10 years, among the 733 prehypertensive subjects, 180 (24.6%) returned to  
 169 normal blood pressure, 325 (44.3%) remained in a prehypertensive state, and 228 (31.1%)  
 170 became hypertensive. For SUA levels, 50.3% had normal SUA, 43.1% were high-normal, and  
 171 only 6.6% had high SUA levels.

172

**Table 2.** Association between Gender, Age, BMI, Uric Acid Excretion, and Uric Acid Concentration to Serum Uric Acid Level

| Variables                  | SUA                      |            | p value | RR   | 95% CI      |
|----------------------------|--------------------------|------------|---------|------|-------------|
|                            | High-normal and high (%) | Normal (%) |         |      |             |
| Gender                     |                          |            |         |      |             |
| Men                        | 237 (32.3)               | 69 (9.4)   | <0.001  | 2.60 | 2.22-3.05   |
| Women                      | 127 (17.3)               | 300 (40.9) |         |      |             |
| Age                        |                          |            |         |      |             |
| Men                        |                          |            |         |      |             |
| 30 – 39 years*             | 52 (17.0)                | 11 (3.6)   | -       | 1    | -           |
| 40 – 49 years              | 104 (34.0)               | 22 (7.2)   | 1.000   | 1.00 | 0.87-1.15   |
| 50 – 59 years              | 81 (26.5)                | 36 (11.8)  | 0.053   | 0.84 | 0.71-0.99   |
| Women                      |                          |            |         |      |             |
| 30 – 39 years*             | 22 (5.2)                 | 85 (19.9)  | -       | 1    | -           |
| 40 – 49 years              | 40 (9.4)                 | 128 (30.0) | 0.530   | 1.16 | 0.73-1.84   |
| 50 – 59 years              | 65 (15.2)                | 87 (20.4)  | <0.001  | 2.08 | 1.37-3.15   |
| BMI                        |                          |            |         |      |             |
| Overweight-Obese           | 171 (23.3)               | 154 (21.0) | 0.153   | 1.13 | 0.96 - 1.32 |
| Underweight-normal         | 193 (26.3)               | 215 (29.3) |         |      |             |
| Uric Acid Excretion (24-h) |                          |            |         |      |             |
| High                       | 169 (23.1)               | 130 (17.7) | 0.002   | 1.32 | 1.10 - 1.57 |
| Normal                     | 195 (26.6)               | 239 (32.6) |         |      |             |
| Uric Acid Concentration    |                          |            |         |      |             |
| Normal                     | 200 (27.3)               | 202 (27.5) | 0.956   | 1.00 | 0.87 – 1.16 |
| High                       | 164 (22.4)               | 167 (22.8) |         |      |             |

\* reference category

173

174

175

176

177

178

179

180

181

182

In men, 32.3% of the subjects had high-normal or high levels of SUA, while in women, only 17.3% had high-normal or high levels of SUA. There was a significant difference in SUA between men and women ( $p < 0.001$ ,  $RR = 2.60$ ,  $95\% \text{ CI} = 2.22\text{--}3.05$ ). When gender was further analysed by age distribution, age was significantly associated with SUA levels only in women aged 50–59 years ( $p < 0.001$ ,  $RR = 2.08$ ,  $95\% \text{ CI} = 1.36\text{--}3.15$ ). Additionally, there was a significant association between SUA levels and uric acid excretion by 24-h urine ( $p = 0.002$ ,  $RR = 1.32$ ,  $95\% \text{ CI} = 1.10\text{--}1.57$ ). On the other hand, no significant association was observed between SUA levels and BMI ( $p = 0.153$ ,  $RR = 1.1$ ,  $95\% \text{ CI} = 0.96\text{--}1.32$ ) or between SUA levels and uric acid concentration ( $p = 0.100$ ,  $RR = 0.786$ ,  $95\% \text{ CI} = 0.59\text{--}1.05$ ) (Table 2).

**Table 3.** Association between Gender and Serum Uric Acid on Blood Pressure

| Variables            | Blood Pressure     |            |        |                    |                           |                         |        |                    |
|----------------------|--------------------|------------|--------|--------------------|---------------------------|-------------------------|--------|--------------------|
|                      | JNC 7 <sup>a</sup> |            |        |                    | 2017 ACC/AHA <sup>b</sup> |                         |        |                    |
|                      | Pre-HT and HT (%)  | Normal (%) | p      | RR (95%CI)         | HT-1 and HT-2 (%)         | Normal and elevated (%) | p      | RR (95%CI)         |
| Gender               |                    |            |        |                    |                           |                         |        |                    |
| Men                  | 234 (31.9)         | 72 (9.8)   | 0.584  | 1.02 (0.94 – 1.11) | 159 (21.7)                | 147 (20.1)              | 0.129  | 0.9 (0.79 - 1.03)  |
| Women                | 319 (43.5)         | 108 (14.7) |        |                    | 246 (33.6)                | 181 (24.7)              |        |                    |
| SUA                  |                    |            |        |                    |                           |                         |        |                    |
| High-normal and High | 290 (39.6)         | 74 (10.1)  | 0.008* | 1.12 (1.03 - 1.22) | 224 (30.6)                | 140 (19.1)              | 0.001* | 1.26 (1.10 - 1.43) |
| Normal               | 263 (35.9)         | 106 (14.5) |        |                    | 181 (24.7)                | 188 (25.6)              |        |                    |
| SUA                  |                    |            |        |                    |                           |                         |        |                    |
| Men                  |                    |            |        |                    |                           |                         |        |                    |
| High-normal and High | 182 (59.5)         | 55 (18.0)  | 0.805  | 1.02 (0.88 – 1.19) | 129 (42.2)                | 108 (35.3)              | 0.109  | 1.25 (0.93 – 1.68) |
| Normal               | 52 (17.0)          | 17 (5.6)   |        |                    | 30 (9.8)                  | 39 (12.7)               |        |                    |
| Women                |                    |            |        |                    |                           |                         |        |                    |
| High-normal and High | 108 (25.3)         | 19 (4.4)   | 0.001* | 1.21 (1.09 – 1.34) | 95 (22.2)                 | 32 (7.5)                | 0.000* | 1.49 (1.28 – 1.73) |
| Normal               | 211 (49.4)         | 89(20.8)   |        |                    | 151 (35.4)                | 149 (34.9)              |        |                    |

<sup>a</sup>BP was categorized using the JNC 7 Guideline

<sup>b</sup>BP was categorized using the 2017 ACC/AHA Guideline

1  
2  
3 184 The associations between gender and SUA levels on BP are shown in Table 3. There  
4  
5  
6 185 was no significant association between gender and BP ( $p=0.584$ ). To examine the association  
7  
8 186 between uric acid and hypertension, we compared SUA levels and morning home BP. The  
9  
10 187 association between SUA levels and BP was statistically significant ( $p=0.008$ ,  $RR=1.12$ , 95%  
11  
12 188  $CI=1.03-1.22$ ). The risk of high-normal and high SUA levels becoming prehypertension or  
13  
14 189 hypertension was 1.12 times higher than that of normal SUA levels. Furthermore, the  
15  
16 190 association between SUA levels and BP in men and women is also described in Table 3. In  
17  
18 191 men, SUA levels were not significantly associated with BP ( $p=0.805$ ,  $RR=1.02$ , 95%  $CI=0.88-$   
19  
20 192  $1.19$ ). However, there was a significant association between SUA levels and BP in women  
21  
22 193 ( $p=0.001$ ,  $RR=1.21$ , 95%  $CI=1.09-1.34$ ). In women, the risk of having prehypertension or  
23  
24 194 hypertension was 1.21 times higher in those who had high-normal and high SUA levels than  
25  
26 195 those with normal SUA levels. Additional analysis using 2017 ACC/AHA guideline for  
27  
28 196 observing the associations between gender and SUA levels on BP also showed similar results  
29  
30 197 with the previous analysis using JNC 7 guideline regarding the significant associations between  
31  
32 198 SUA levels and BP.

33  
34  
35  
36  
37 199 Figure 1 shows the association between SUA and cardiovascular risk factors. The SUA  
38  
39 200 levels were significantly associated with total cholesterol ( $p=0.001$ ), LDL ( $p=0.002$ ), HDL  
40  
41 201 ( $p<0.001$ ), triglycerides ( $p<0.001$ ) and fasting blood glucose ( $p=0.030$ ). Subjects with high-  
42  
43 202 normal and high SUA levels had significantly higher total cholesterol, LDL, and triglyceride  
44  
45 203 levels than subjects with normal SUA levels. On the other hand, HDL and fasting blood glucose  
46  
47 204 were statistically lower among subjects with high-normal and high SUA levels than among  
48  
49 205 those with normal SUA levels.

50  
51  
52  
53 206 The relationships between SUA levels and cardiovascular risk factors among men and  
54  
55 207 women are presented in Figure 2. In men, there were significant differences in BMI ( $p<0.001$ )  
56  
57 208 and triglycerides ( $p=0.002$ ) between subjects with normal SUA levels and those with high-  
58  
59  
60

209 normal and high SUA levels. In women, there was no significant differences in all  
 210 cardiovascular risk factors ( $p>0.05$ ) between subjects with normal SUA levels and those with  
 211 high-normal and high SUA levels.

**Table 4.** Multiple Linear Regression of Association of Cardiovascular Risk Factors and SUA on Blood Pressure

| Variables             | Blood Pressure of Men |         |                  |         | Blood Pressure of Women |         |                  |         |
|-----------------------|-----------------------|---------|------------------|---------|-------------------------|---------|------------------|---------|
|                       | Systolic              |         | Diastolic        |         | Systolic                |         | Diastolic        |         |
|                       | Coef.<br>$\beta$      | p-value | Coef.<br>$\beta$ | p-value | Coef.<br>$\beta$        | p-value | Coef.<br>$\beta$ | p-value |
| SUA                   | -0.184                | 0.817   | 0.612            | 0.253   | 5,588                   | <0.001* | 2,196            | <0.001* |
| BMI                   | 1,428                 | <0.001* | 1,208            | <0.001* | 0.757                   | 0.001*  | 0.727            | <0.001* |
| Total Cholesterol     | 0.027                 | 0.819   | 0.034            | 0.670   | 0.130                   | 0.253   | 0.029            | 0.645   |
| LDL                   | -0.037                | 0.762   | -0.019           | 0.815   | -0.09                   | 0.438   | -0.015           | 0.824   |
| HDL                   | 0.190                 | 0.181   | 0.047            | 0.624   | -0.002                  | 0.988   | -0.051           | 0.469   |
| Triglyceride          | 0.000                 | 0.991   | 0.002            | 0.929   | -0.024                  | 0.377   | 0.005            | 0.726   |
| Fasting Blood Glucose | 0.056                 | 0.036*  | 0.010            | 0.562   | 0.117                   | <0.001* | 0.039            | 0.020*  |

\*Significant ( $p<0.05$ )

212  
 213 Multivariable analysis was conducted to describe the association between SUA levels  
 214 and BP, with adjustment for cardiovascular risk factors. Cardiovascular risk factors such as  
 215 BMI, total cholesterol, LDL, HDL, triglycerides, and fasting blood glucose were all taken into  
 216 account for adjustment in multiple linear regression (Table 4). BMI, fasting blood glucose, and  
 217 SUA levels were significantly associated with BP. BMI was significantly associated with SBP  
 218 and DBP both in men ( $p<0.001$  and  $p<0.001$ ) and women ( $p=0.001$  and  $p<0.001$ ). In addition,  
 219 fasting blood glucose was found to be associated with SBP in men ( $p=0.036$ ) and women  
 220 ( $p<0.001$ ) and was also associated with DBP in women ( $p=0.020$ ). Regarding SUA levels, SUA  
 221 was significantly associated with both SBP and DBP in women ( $p<0.001$  and  $p<0.001$ ,  
 222 respectively) but not in men.

## 226 DISCUSSION

227 This study consisted of two parts of data collection. The first data collection was  
228 performed in 2007 to gather data on the prehypertension population (n=4,190); this study was  
229 later called the “Mlati Study Database”. In 2017, after 10 years, the second data collection was  
230 performed to gather samples from the Mlati Study Database by a random sampling method  
231 (n=733) to show the change in BP status from prehypertension to hypertension. The data  
232 collection in 2017 also aimed to show the association between uric acid (serum, urinary  
233 excretion, and concentrate) and hypertension.

234 The results of our study showed that gender and uric acid excretion (by 24-h urine)  
235 were significantly associated with SUA levels. The mean SUA levels in men were significantly  
236 higher than those in women. In addition, subjects with high-normal and high SUA levels had  
237 a risk of developing prehypertension and hypertension that was 1.12 times higher than those  
238 with normal SUA levels. When analysed by gender, high-normal and high SUA levels were  
239 significantly associated with prehypertension and hypertension only in women. The  
240 relationship between SUA levels and the development of hypertension or renal disease has  
241 been shown in several previous studies. This relationship was significantly higher in women  
242 than in men.[13,14]

243 The study by Kawabe *et al.* revealed that in women, the older the age was, the higher  
244 the quartile of SUA, but in men, the quartile of SUA did not increase with age. However, an  
245 increase in the quartile of SUA along with higher BMI was only found in men but not in  
246 women. Additionally, the mean value of SUA in men was higher than in women.[15] These  
247 results were consistent with our finding that SUA levels were significantly higher in men and  
248 that SUA levels were significantly associated with higher BMI in men. However, the study  
249 populations in this study and in the study by Kawabe *et al.* were different in terms of the age  
250 group examined, which were adults (30–59 years old) and elderly adults, respectively.[15]



1  
2  
3 251 Similar finding was also found by Zhang, *et al.* which reported that SUA levels were  
4  
5 252 statistically higher in men than in women, though the SUA level did not increase with the age  
6  
7 253 both in men and women.[16] These studies results were consistent with our finding which  
8  
9 254 stated that SUA level was significantly higher in men and SUA level was significantly  
10  
11 255 associated with higher BMI also in men. However, the study population in this study and in the  
12  
13 256 study by Kawabe, *et al.* was different in the age group which were adults (30-59 years) and  
14  
15 257 elderly, respectively.

16  
17  
18  
19 258         Chen *et al.* reported a different result in a cross-sectional analysis regarding the  
20  
21 259 association between SUA levels and the presence of hypertension when analysed by gender.  
22  
23 260 For the total population, SUA levels had significant associations with hypertension. The levels  
24  
25 261 of SUA had a significant relationship with hypertension in men aged <30 years, 30–40 years,  
26  
27 262 and >40 years but only in women aged >40 years.[8] This situation could be explained with  
28  
29 263 Table 2, which provides the age distribution of women and its association with SUA levels. In  
30  
31 264 Table 2, the proportion of women aged 40–49 years combined with those aged 50–59 years  
32  
33 265 having high-normal and high SUA levels was 24.6%. This age range in women is associated  
34  
35 266 with menopausal problems. A study by Hak *et al.* stated that menopause was associated with  
36  
37 267 an increased risk of incident gout, which may help explain why the age of the women in this  
38  
39 268 study could play a significant role in their SUA levels.[17]

40  
41  
42  
43 269         Regarding the cardiovascular risk factors, the result of this study found that the SUA  
44  
45 270 levels were significantly associated with total cholesterol ( $p=0.001$ ), LDL ( $p=0.002$ ), HDL  
46  
47 271 ( $p<0.001$ ), triglycerides ( $p<0.001$ ) and fasting blood glucose ( $p=0.030$ ), regardless of gender.  
48  
49 272 When the data were analysed by gender, significant differences were found only in BMI and  
50  
51 273 triglycerides and only in men ( $p<0.001$  and  $p=0.002$ , respectively). Another study has shown  
52  
53 274 a stronger association between the increasing of SUA level and cardiovascular mortality among  
54  
55 275 women in healthy subjects compared to men.[18] Meta-analysis showed that there was  
56  
57  
58  
59  
60

1  
2  
3 276 significant association between hyperuricemia and cardiovascular mortality in women, but not  
4  
5 277 in men.[19] Chen *et al.* reported that SUA levels were significantly associated with the  
6  
7 278 occurrence of metabolic syndrome and hypertension in the total population. In men, SUA levels  
8  
9 279 had a positive association with the occurrence of metabolic syndrome in the age groups of <30  
10  
11 280 and 30–40. In women, SUA levels were significantly associated with the occurrence of  
12  
13 281 metabolic syndrome in the age groups of <30 and >40.[8]  
14  
15

16  
17 282 In this study, BMI was associated with blood pressure by both gender and SUA levels  
18  
19 283 in men. This finding was in line with those of a previous study by Droyvold *et al.*, in which the  
20  
21 284 authors reported that an increase in BMI was associated with increased BP in men and  
22  
23 285 women.[20] With regard to the association between BMI and SUA levels, our findings were  
24  
25 286 different from those of a report by Rodrigues *et al.*, in which the authors reported a significant  
26  
27 287 correlation between BMI and SUA levels in both men and women.[21] The link between BMI  
28  
29 288 and hyperuricaemia has not been well elucidated; however, insulin resistance might be the  
30  
31 289 bridging gap. Obese people are more likely to have metabolic syndrome, and metabolic  
32  
33 290 syndrome itself is associated with insulin resistance. It is thought that insulin resistance impairs  
34  
35 291 the ability of the kidney to excrete uric acid and therefore leads to hyperuricaemia.[22]  
36  
37  
38  
39

40 292 This study found that fasting blood glucose was associated with SBP in both genders  
41  
42 293 and with DBP only in women. The same result was observed in a study by Yan *et al.*, which  
43  
44 294 revealed that fasting plasma glucose was independent of both SBP and DBP.[23] Moreover,  
45  
46 295 fasting blood glucose was also associated with SUA levels, but only in men. This finding is  
47  
48 296 contradictory to those of a study by Kawamoto *et al.*, which revealed that SUA levels were  
49  
50 297 associated with fasting plasma glucose in females but not in males.[24] The mechanism of how  
51  
52 298 this phenomenon occurred remains unclear, and further study is needed to observe a cause-  
53  
54 299 effect relationship. Serum triglycerides were also associated with SUA levels in this study. The  
55  
56 300 relationship between SUA levels and lipid profiles has been described in various studies, but  
57  
58  
59  
60

1  
2  
3 301 the exact mechanism remains unclear. A study by Peng *et al.* revealed that all lipid profile  
4  
5 302 parameters, including triglycerides but not HDL cholesterol, were associated with SUA  
6  
7 303 levels.[25] SUA levels were associated with both SBP and DBP but only in women. This result  
8  
9  
10 304 is similar to those of previous studies.[24, 26] It has been suggested that the mechanism by  
11  
12 305 which uric acid causes hypertension is due to endothelial dysfunction after oxidative stress  
13  
14 306 damage to the endothelium during excessive uric acid formation.[26]  
15  
16  
17 307

## 18 19 308 **CONCLUSION**

20  
21 309 In conclusion, after 10 years of follow-up, the SUA levels in men are significantly  
22  
23 310 higher than those in women. Moreover, high-normal and high SUA levels were significantly  
24  
25 311 associated with prehypertension and hypertension in women but not in men. For the total  
26  
27 312 population, SUA levels were significantly associated with the levels of total cholesterol, LDL,  
28  
29 313 HDL, triglycerides and fasting blood glucose. The BMI was found to be significantly  
30  
31 314 associated with BP in both men and women. Fasting blood glucose is significantly associated  
32  
33 315 with SBP in men and with SBP and DBP in women; meanwhile, SUA levels were significantly  
34  
35 316 associated with BP only in women.  
36  
37  
38  
39

## 40 317 41 42 318 **ACKNOWLEDGEMENTS**

43  
44 319 We would like to thank the Mlati Study Group, which assisted in this research. We would also  
45  
46 320 like to thank Prodia Laboratory for performing laboratory examinations.  
47  
48

## 49 321 **CONTRIBUTORS**

50  
51 322 LAB and MS composed the idea of the study and arranged the study's design. MS, FI, AW,  
52  
53 323 and AK obtained the data. ZZ led the statistical analysis with the supervision of MS. MS, LAB  
54  
55 324 and ZZ wrote the first draft of this paper and all authors read, revised, and approved the final  
56  
57 325 manuscript.  
58  
59  
60

1  
2  
3 326 **FUNDING**  
4

5 327 This research was supported by the Mlati Study Group, Faculty of Medicine, University of  
6  
7  
8 328 Gadjah Mada, Indonesia.  
9

10 329 **DISCLOSURE**  
11

12 330 There were no conflicts of interest to disclose.  
13

14  
15 331 **DATA SHARING STATEMENT**  
16

17 332 Data may be obtained from the corresponding author upon reasonable request.  
18  
19  
20  
21  
22 334

23  
24 335 **REFERENCES**  
25  
26

- 27 336 1. Mills KT, Bundy JD, Kelly TN, *et al.* Global disparities of hypertension prevalence and  
28  
29 337 control: A systematic analysis of population-based studies from 90 countries.  
30  
31 338 *Circulation*. 2016; 134:441-50.  
32  
33  
34 339 2. Annual Health Research Report. Division of Research and Health Development:  
35  
36 340 Indonesian Ministry of Health. 2013.  
37  
38 341 3. Cicero AFG, Rosticci M, Fogacci F, *et al.* High Serum Uric Acid is Associated to  
39  
40 342 Poorly Controlled Blood Pressure and Higher Arterial Stiffness in Hypertensive  
41  
42 343 Subjects. *Eur J Int Med* 2017; 37:38–42.  
43  
44  
45 344 4. Jin M, Yang F, Yang I, *et al.* Uric Acid, Hyperuricemia and Vascular Diseases. *Front*  
46  
47 345 *Biosci* 2012; 17:656–69.  
48  
49 346 5. Grayson PC, Kim SY, LaValley M, *et al.* Hyperuricemia and Incident Hypertension: A  
50  
51 347 Systematic Review and Meta-analysis. *Arthritis Care Res* 2011; 63:102–10.  
52  
53  
54 348 6. Sundström J, Sullivan L, D'Agostino RB, *et al.* Relations of Serum Uric Acid to  
55  
56 349 Longitudinal Blood Pressure Tracking and Hypertension Incidence. *Hypertens* 2005;  
57  
58 350 45:28-33  
59  
60

- 1  
2  
3 351 7. Jiang M, Gong D, Fan Y. Serum uric acid levels and risk of prehypertension: a meta-  
4  
5 352 analysis. *Clin Chem Lab Med*. 2016; DOI:10.1515.  
6  
7  
8 353 8. Chen YY, Kao TW, Yang HF, *et al*. The Association of Uric Acid with The Risk of  
9  
10 354 Metabolic Syndrome, Arterial Hypertension or Diabetes in Young Subjects - An  
11  
12 355 Observational Study. *Clin Chim Acta* 2018; 48:68-73.  
13  
14  
15 356 9. Borghi C, Rodriguez-Artalejo F, De Backer G, *et al*. Serum Uric Acid Levels are  
16  
17 357 Associated with Cardiovascular Risk Score: A Post hoc Analysis of the EURIKA  
18  
19 358 Study. *Int J of Cardiol* 2018; 253:167-173  
20  
21 359 10. Chobanian AV, Bakris GL, Black HR, *et al*. The Seventh Report of The JNC on  
22  
23 360 Prevention, Detection and Treatment of High Blood Pressure: The JNC 7 Report. *J Am*  
24  
25 361 *Med Assoc* 2003; 289(19): 2560-72.  
26  
27  
28 362 11. Whelton PK, Carey RM, Aronow WS, *et al*. 2017 ACC/AHA/AAPA/ABC/ACPM/  
29  
30 363 AGS/APhA/ASH/ASPC/NMA/PCNA Guideline for the Prevention, Detection,  
31  
32 364 Evaluation, and Management of High Blood Pressure in Adults: Executive Summary.  
33  
34 365 A Report of the American College of Cardiology/American Heart Association Task  
35  
36 366 Force on Clinical Practice Guidelines. *Hypertension* 2018; 71(6):1269-1324.  
37  
38  
39 367 12. Sja'bani M. Hypertension and Renoprotective Effects of High Serum Uric Acid  
40  
41 368 Treatment. In Annual Scientific Meeting of Indonesian Nephrology in Palembang.  
42  
43 369 South Sumatra, Indonesia: Lembaga Penerbit Ilmu Penyakit Dalam, Bagian Ilmu  
44  
45 370 Penyakit Dalam Fakultas Kedokteran UNSRI, Palembang. 2014.  
46  
47  
48 371 13. Lee JJ, Ahn J, Hwang J, *et al*. Relationship between Uric Acid and Blood Pressure in  
49  
50 372 Different Age Groups. *Clin Hypertens* 2015; 21:14  
51  
52  
53 373 14. Zhang W, Sun K, Yang Y, *et al*. Plasma Uric Acid and  
54  
55 374 Hypertension in a Chinese Community: Prospective Study and Meta-Analysis. *Clin*  
56  
57 375 *Chem* 2009; 55:2026–34.  
58  
59  
60

- 1  
2  
3 376 15. Kawabe M, Sato A, Hoshi T, *et al.* Gender Differences in The Association Between  
4  
5 377 Serum Uric Acid and Prognosis in Patients with Acute Coronary Syndrome. *J Cardiol*  
6  
7 378 2016; 67:170–176.  
8  
9  
10 379 16. Zhang C, Liu R, Yuan J, *et al.* Gender-related Differences in The Association between  
11  
12 380 Serum Uric Acid and Left Ventricular Mass Index in Patients with Obstructive  
13  
14 381 Hypertrophic Cardiomyopathy. *Biol Sex Differ* 2016; 7:22.  
15  
16  
17 382 17. Hak AE, Curhan GC, Grodstein F, *et al.* Menopause, post-menopausal hormone use  
18  
19 383 and risk of incident gout. *Ann Rheum Dis* 2010;69(7):1305-9.  
20  
21 384 18. Freedman DS, Williamson DF, Gunter EW, *et al.* Relation of serum uric acid to  
22  
23 385 mortality and ischemic heart disease. The NHANES I Epidemiologic Followup Study.  
24  
25 386 *Am J Epidemiol* 1995; 141:637–44.  
26  
27  
28 387 19. Kim SY, Guevara JP, Kim KM, *et al.* Hyperuricemia and coronary heart disease: a  
29  
30 388 systematic review and meta-analysis. *Arthritis Care Res (Hoboken)* 2010; 62:170–80.  
31  
32  
33 389 20. Droyvold WB, Midtjhell K, Nilsen TIL, *et al.* Change in Body Mass Index and Its  
34  
35 390 Impact on Blood Pressure: A Prospective Population Study. *Int J Obes.* 2005; 29:650-  
36  
37 391 655.  
38  
39  
40 392 21. Rodrigues SL, Baldo MP, Capingana DP, *et al.* Gender Difference of Serum Uric Acid  
41  
42 393 and Cardiovascular Risk Factors: Population Based Study. *Arq Bras Cardiol.* 2011.  
43  
44  
45 394 22. Li C, Hsieh MC, Chang SJ. Metabolic Syndrome, Diabetes, and Hyperuricemia. *Curr*  
46  
47 395 *Opin Rheumatol.* 2013; 25:210-216.  
48  
49 396 23. Yan Q, Sun D, Li X, *et al.* Association of Blood Glucose Level and Hypertension in  
50  
51 397 Elderly Chinese Subjects: A Community Based Study. *BMC Endocr Disord.* 2016;  
52  
53 398 16:40.  
54  
55  
56  
57  
58  
59  
60

- 1  
2  
3 399 24. Kawamoto R, Tabara Y, Kohara K, *et al.* Serum Uric Acid is More Strongly Associated  
4  
5 400 with Impaired Fasting Blood Glucose in Women Than in Men From A Community-  
6  
7 401 Dwelling Population. *PLoS One.* 2013; 8(6):1-5.  
8  
9  
10 402 25. Peng TC, Wang CC, Kao TW, *et al.* Relationship between Hyperuricemia and Lipid  
11  
12 403 Profiles in US Adults. *BioMed Res Int.* 2015.  
13  
14  
15 404 26. Maruhashi T, Nakashima A, Soga J, *et al.* Hyperuricemia is Independently Associated  
16  
17 405 with Endothelial Dysfunction in Post-Menopausal Women but not in Pre-Menopausal  
18  
19 406 Women. *BMJ Open.* 2013; 3:e003659.  
20  
21  
22 407  
23  
24 408  
25  
26 409  
27  
28  
29  
30  
31  
32  
33  
34  
35  
36  
37  
38  
39  
40  
41  
42  
43  
44  
45  
46  
47  
48  
49  
50  
51  
52  
53  
54  
55  
56  
57  
58  
59  
60

1  
2  
3 **410 Figure Legend**  
4

5  
6 411 Figure 1. The SUA/serum uric acid levels were significantly associated with total cholesterol  
7  
8 412 (p=0.001), LDL/low density lipoprotein (p=0.002), HDL/high density lipoprotein (p<0.001),  
9  
10 413 triglycerides (p<0.001) and fasting blood glucose (p=0.030).

11  
12 414 Figure 2. Significant differences were found in BMI (p<0.001) and triglycerides (p=0.002)  
13  
14 415 between subjects with normal SUA levels and those with high-normal and high SUA levels in  
15  
16 416 men. No significant difference was found (p>0.05) between subjects with normal SUA levels  
17  
18 417 and those with high-normal and high SUA levels in women.  
19  
20  
21  
22  
23  
24  
25  
26  
27  
28  
29  
30  
31  
32  
33  
34  
35  
36  
37  
38  
39  
40  
41  
42  
43  
44  
45  
46  
47  
48  
49  
50  
51  
52  
53  
54  
55  
56  
57  
58  
59  
60



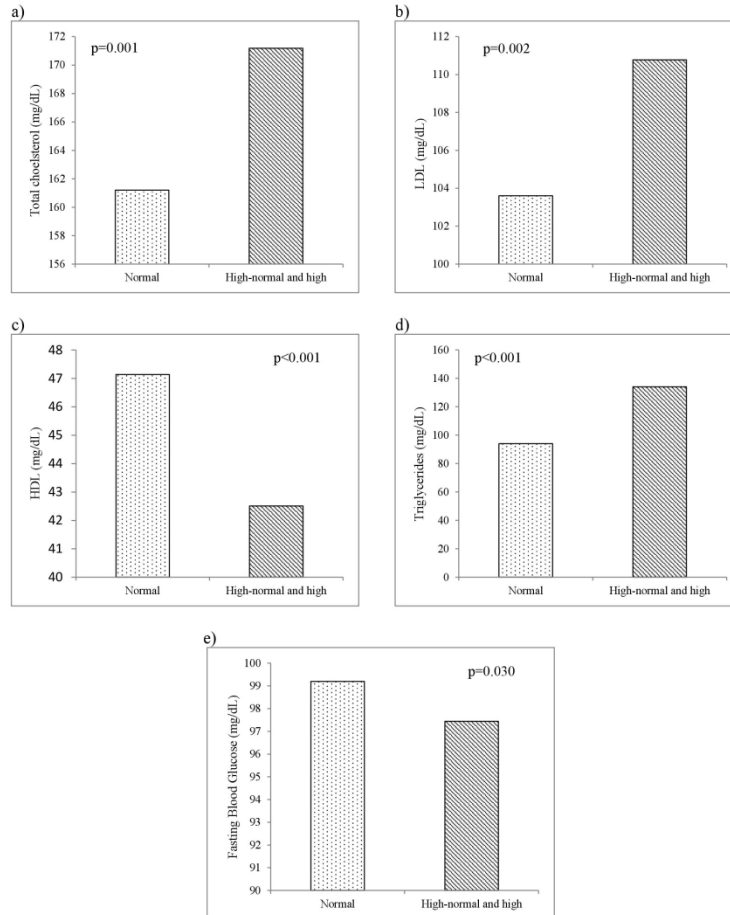

Fig. 1. Mean of cardiovascular risk factors in different serum uric acid levels

210x297mm (300 x 300 DPI)

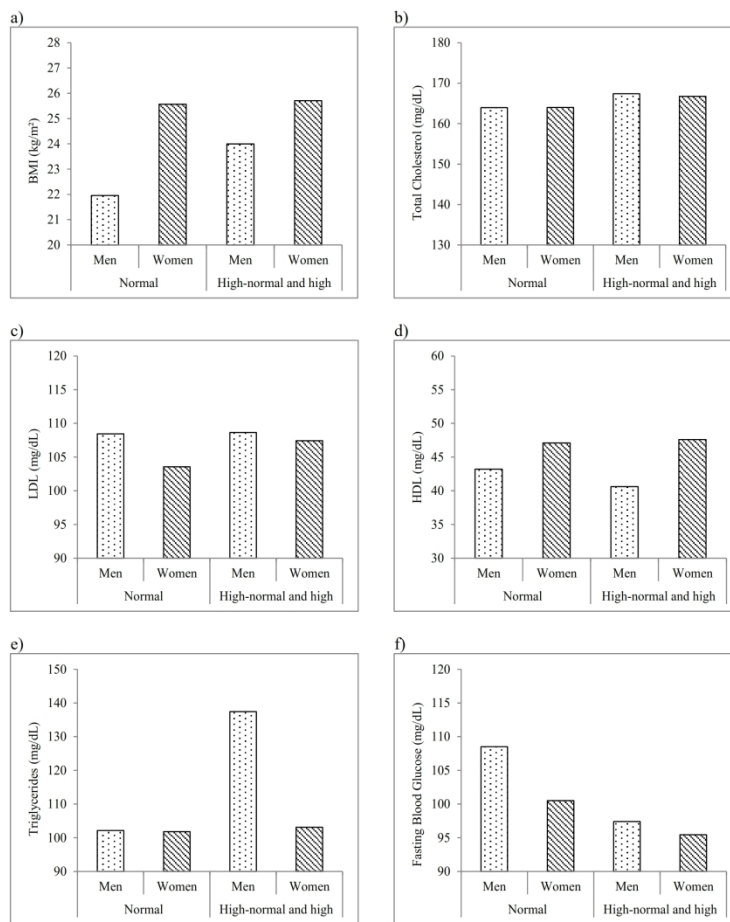

**Fig. 2.** Mean of cardiovascular risk factors in men and women between normal and high-normal/high SUA levels. In men, BMI, LDL, triglyceride and fasting blood glucose values were analysed using the Mann-Whitney U test; total cholesterol and HDL levels were analysed using independent samples t-tests. In women, BMI, total cholesterol, LDL, HDL and triglyceride levels were analysed using the Mann-Whitney U test; fasting blood glucose was analysed using independent samples t-tests.

209x297mm (300 x 300 DPI)

# BMJ Open

## Association of Serum Uric Acid, Morning Home Blood Pressure and Cardiovascular Risk Factors in a Prehypertensive Population

|                                 |                                                                                                                                                                                                                                                                                                                                                                                                                                                                                                                                                                                                                                                                                        |
|---------------------------------|----------------------------------------------------------------------------------------------------------------------------------------------------------------------------------------------------------------------------------------------------------------------------------------------------------------------------------------------------------------------------------------------------------------------------------------------------------------------------------------------------------------------------------------------------------------------------------------------------------------------------------------------------------------------------------------|
| Journal:                        | <i>BMJ Open</i>                                                                                                                                                                                                                                                                                                                                                                                                                                                                                                                                                                                                                                                                        |
| Manuscript ID                   | bmjopen-2020-038046.R1                                                                                                                                                                                                                                                                                                                                                                                                                                                                                                                                                                                                                                                                 |
| Article Type:                   | Original research                                                                                                                                                                                                                                                                                                                                                                                                                                                                                                                                                                                                                                                                      |
| Date Submitted by the Author:   | 14-May-2020                                                                                                                                                                                                                                                                                                                                                                                                                                                                                                                                                                                                                                                                            |
| Complete List of Authors:       | Bawazier, Lucky ; Universitas Indonesia, Department of Internal Medicine, Faculty of Medicine<br>Sja'bani, Mochammad; Universitas Gadjah Mada, Mlati Study, Department of Internal Medicine, Faculty of Medicine, Public Health and Nursing<br>Irijanto, Fredie; DR. Soeradji Tirtonegoro Hospital<br>Zulaela, Zulaela; Universitas Gadjah Mada, Faculty of Mathematics and Natural Sciences<br>Widiatmoko, Agus; Universitas Muhammadiyah Yogyakarta, Department of Internal Medicine, Faculty of Medicine and Health Sciences<br>Kholiq, Abdul; Universitas Muhammadiyah Yogyakarta, Faculty of Medicine and Health Sciences<br>Tomino, Yasuhiko; Medical Corporation Group Showakai |
| <b>Primary Subject Heading</b>: | Public health                                                                                                                                                                                                                                                                                                                                                                                                                                                                                                                                                                                                                                                                          |
| Secondary Subject Heading:      | Epidemiology                                                                                                                                                                                                                                                                                                                                                                                                                                                                                                                                                                                                                                                                           |
| Keywords:                       | Hypertension < CARDIOLOGY, PUBLIC HEALTH, EPIDEMIOLOGY                                                                                                                                                                                                                                                                                                                                                                                                                                                                                                                                                                                                                                 |
|                                 |                                                                                                                                                                                                                                                                                                                                                                                                                                                                                                                                                                                                                                                                                        |

SCHOLARONE™  
Manuscripts



I, the Submitting Author has the right to grant and does grant on behalf of all authors of the Work (as defined in the below author licence), an exclusive licence and/or a non-exclusive licence for contributions from authors who are: i) UK Crown employees; ii) where BMJ has agreed a CC-BY licence shall apply, and/or iii) in accordance with the terms applicable for US Federal Government officers or employees acting as part of their official duties; on a worldwide, perpetual, irrevocable, royalty-free basis to BMJ Publishing Group Ltd ("BMJ") its licensees and where the relevant Journal is co-owned by BMJ to the co-owners of the Journal, to publish the Work in this journal and any other BMJ products and to exploit all rights, as set out in our [licence](#).

The Submitting Author accepts and understands that any supply made under these terms is made by BMJ to the Submitting Author unless you are acting as an employee on behalf of your employer or a postgraduate student of an affiliated institution which is paying any applicable article publishing charge ("APC") for Open Access articles. Where the Submitting Author wishes to make the Work available on an Open Access basis (and intends to pay the relevant APC), the terms of reuse of such Open Access shall be governed by a Creative Commons licence – details of these licences and which [Creative Commons](#) licence will apply to this Work are set out in our licence referred to above.

Other than as permitted in any relevant BMJ Author's Self Archiving Policies, I confirm this Work has not been accepted for publication elsewhere, is not being considered for publication elsewhere and does not duplicate material already published. I confirm all authors consent to publication of this Work and authorise the granting of this licence.

1  
2  
3 1 **ASSOCIATION OF SERUM URIC ACID, MORNING HOME BLOOD PRESSURE**  
4  
5 2 **AND CARDIOVASCULAR RISK FACTORS IN A PREHYPERTENSIVE**  
6  
7 3 **POPULATION**  
8  
9 4

10  
11  
12 5 **Lucky A Bawazier<sup>1,2</sup>, Mochammad Sja'bani<sup>1</sup>, Freddie Irijanto<sup>1,3</sup>, Zulaela<sup>1,4</sup>, Agus**  
13  
14 6 **Widiatmoko<sup>1,5</sup>, Abdul Kholiq<sup>1,6</sup>, Yasuhiko Tomino<sup>7</sup>**  
15  
16  
17 7

18  
19 8 <sup>1</sup> Mlati Study Group, Department of Internal Medicine, Faculty of Medicine, Public Health and Nursing,  
20  
21 9 Universitas Gadjah Mada, Yogyakarta, Indonesia

22  
23 10 <sup>2</sup> Department of Internal Medicine, Faculty of Medicine, Universitas Indonesia, Jakarta, Indonesia

24  
25 11 <sup>3</sup> Dr. Soeradji Tirtonegoro General Hospital, Klaten, Central Java, Indonesia

26  
27 12 <sup>4</sup> Department of Mathematics, Faculty of Mathematics and Natural Sciences, Universitas Gadjah Mada,  
28  
29 13 Yogyakarta, Indonesia

30  
31 14 <sup>5</sup> Department of Internal Medicine, Faculty of Medicine, Universitas Muhammadiyah Yogyakarta, Yogyakarta,  
32  
33 15 Indonesia

34  
35 16 <sup>6</sup> Faculty of Medicine, Universitas Muhammadiyah Yogyakarta, Yogyakarta, Indonesia

36  
37 17 <sup>7</sup> Medical Corporation SHOWAKAI, Tokyo, Japan  
38  
39 18

40  
41 19 **Correspondence:**

42  
43 20 Name : Mochammad Sja'bani

44  
45 21 Address : Perumahan Nandan Griya Idaman, Jalan Nandan Baru 19A Sleman,  
46  
47 22 Yogyakarta 55284, Indonesia

48  
49 23 Telephone : +62811282830

50  
51 24 Fax : +62274 625225

52  
53 25 Email : msbani\_jogja@yahoo.com  
54  
55  
56  
57 26

58  
59 27 **Word count: 3537**  
60

**ABSTRACT**

**Objective:** To observe the changes in blood pressure (BP) over 10 years and to investigate its association to serum uric acid (SUA) levels and cardiovascular risk factors in the epidemiological data of a target group of prehypertensive patients in 2007.

**Design:** cross-sectional cohort study

**Setting:** Mlati Sub-district, Sleman District, Yogyakarta Province, Indonesia

**Participants:** Prehypertension population dataset (n=4190), with blood pressure classification of SBP of 120–139 mmHg and/or DBP of 80–89 mmHg, were used from the 2007 “Mlati Study Database”. A total of 733 patients were selected by simple random sampling using statistical software. Subjects had both physical and laboratory examinations.

**Outcome measures:** Morning home blood pressure and laboratory examination of urine (uric acid excretion and creatinine) and blood samples (SUA, blood urea nitrogen, creatinine, a lipid profile (total cholesterol, low density lipoprotein/LDL-C, high density lipoprotein/HDL-C and triglycerides), and fasting blood glucose levels)

**Results:** Mean (SD) of SUA levels were significantly higher in men than in women (5.78 (1.25) mg/dL vs 4.52 (1.10) mg/dL,  $p<0.001$ ). Furthermore, men tended to have high-normal (5–7 mg/dL) and high serum uric acid levels ( $\geq 7$  mg/dL) compared to women ( $p<0.001$ , RR=2.60). High-normal and high SUA levels were significantly associated with prehypertension and hypertension only in women ( $p=0.001$ , RR=1.21). Age and body mass index was found to be significantly associated with both systolic and diastolic BP in men, but only with systolic BP in women. Fasting blood glucose was significantly associated with systolic and diastolic BP in women; meanwhile, SUA was significantly associated with BP only in women.

1  
2  
3 52 **Conclusion:** We concluded that serum uric acid levels were significantly associated with  
4  
5 53 prehypertension and hypertension only in women. Blood pressure was associated with age,  
6  
7 54 body mass index, serum uric acid levels and fasting blood glucose in women, whereas in  
8  
9 55 men, blood pressure was only associated with age body mass index.  
10  
11  
12  
13

14 56  
15 57 **Keywords:** blood pressure, serum uric acid, cardiovascular risk factor, gender differences  
16  
17 58

### 19 59 **STRENGTH AND LIMITATION OF THIS STUDY**

- 20  
21 60 • This study followed up the changes of blood pressure on subjects for over 10 years.  
22  
23 61 • The association between serum uric acid, blood pressure, and cardiovascular risk factors  
24  
25 62 were analyzed based on gender.  
26  
27 63 • The analysis' were also performed by using both JNC 7 and 2017 ACC/AHA guideline.  
28  
29 64 • This study could not present the changes of all measured value over 10 year period  
30  
31 65 because in the prior study in 2007, these laboratory value were not examined, except for  
32  
33 66 blood pressure.  
34  
35  
36  
37  
38 67  
39  
40  
41  
42  
43  
44  
45  
46  
47  
48  
49  
50  
51  
52  
53  
54  
55  
56  
57  
58  
59  
60

## 68 INTRODUCTION

69 Hypertension is still a major problem worldwide, as reflected by a meta-analysis report  
70 in 2016 stating that in 2010, 40% of the world's population was hypertensive and that  
71 approximately 17 million people worldwide died due to hypertension.[1] In Indonesia, the  
72 prevalence of hypertension in 2013 was 25.8%, based on the Indonesian Ministry of Health  
73 report.[2] Therefore, it is important to facilitate the early diagnosis and treatment of  
74 hypertension and its possible effects. Patients with prehypertension were hypothesized to  
75 eventually become hypertensive after 10 years, and thus have a poorer quality of life [3,4].  
76 During the last two decades, it has been repeatedly published that the incidence of  
77 hypertension is associated with even moderate increases in levels of serum uric acid (SUA)  
78 and an increased risk of cardiovascular diseases (CVD).[5,6] The Framingham Heart Study  
79 reported an increased risk of blood pressure (BP) progression in 3157 subjects with  
80 hyperuricaemia. SUA was positively associated with increases in both systolic blood pressure  
81 (SBP) and diastolic blood pressure (DBP) after 4 years with no antihypertensive treatment.[7]  
82 Current findings based on a large-scale cohort study suggested that uric acid is a predictive  
83 factor of the development of prehypertension in adults.[8] A meta-analysis by Jiang *et al.*  
84 indicated that SUA was possibly associated with prehypertension but still found conflicting  
85 results.[9] The associations among SUA, hypertension, cardiovascular risk factors and gender  
86 remain controversial. Serum uric acid levels has been known to have an association with  
87 blood pressure and hypertension.[10-12] Some studies reported that hyperuricemia have  
88 higher susceptibility of developing hypertension especially in men [10,13], while the other  
89 study reported vice versa.[14] Lee *et al.* also showed that hyperuricemia in women led to  
90 higher risk of developing hypertension than in men.[15] In term of the association of SUA  
91 and cardiovascular risk, SUA did not have a causal role in the development of cardiovascular  
92 outcomes.[16] Another study stated that the serum uric acid level was an independent



1  
2  
3 93 predictive factor for cardiovascular risk in individual without hypertension and diabetic.[17]  
4  
5 94 SUA also being reported to have stronger association on cardiovascular risk [18] and risk of  
6  
7  
8 95 cardiovascular disease mortality [19,20] in women than in men.

9  
10 96 Therefore, the aim of this study was to observe the progression from prehypertension  
11  
12 97 to hypertension after 10 years of follow-up and its association with SUA as well as other  
13  
14  
15 98 cardiovascular risk factors.

16  
17 99

## 100 **METHODS**

### 101 *Study Design*

102 This study was a cross-sectional cohort study of ten years of follow-up (2007–2017)  
103 conducted in Mlati Sub-district, Sleman District in the Yogyakarta Special Region, Indonesia.  
104 The protocol of this study was approved by Medical and Health Research Ethics Committee  
105 of Faculty of Medicine, Public Health and Nursing, Universitas Gadjah Mada, Yogyakarta,  
106 Indonesia with the ID approval of KE/FK/0961/EC/2017.

### 107 *Study Population*

108 We pooled data from participants enrolled in the 2007 Mlati Study Database. The  
109 sample of the Mlati Study included 12,073 people aged 20–69 years who lived in 3 villages  
110 in Mlati (Tirtoadi, Sumberadi, and Tlogoadi), Sleman, Yogyakarta, Indonesia. The inclusion  
111 criteria for the prehypertensive subgroup of the study sample were SBP of 120–139 mmHg  
112 and/or DBP of 80–89 mmHg, no proteinuria, no glycosuria, and age between 20 and 49  
113 years; this subgroup included 4,190 participants (current age was 30–59 years). In 2017, of  
114 the 4,190 individuals with a history of prehypertension in 2007, 1500 subjects were selected  
115 as participants in the current study by simple random sampling using statistical software. All  
116 1500 subjects were invited to have a physical and laboratory examination; however, only 733  
117 subjects who participated in the sampling were examined (the other subjects who did not

1  
2  
3 118 show up during the laboratory examination were due to the change of residential area or  
4  
5 119 death or any other unknown reasons and were excluded from this study). All subjects did not  
6  
7  
8 120 take any drugs lowering BP and SUA. All subjects were provided informed consent at the  
9  
10 121 beginning of the study (Figure 1).

### 12 122 ***Patient and Public Involvement***

13  
14  
15 123 Patient were not involved in any of the design, analysis, and presentation of the study results.

### 16 124 ***Definition of Prehypertension and Hypertension***

17  
18  
19 125 The definitions of prehypertension and hypertension were based on the Seventh  
20  
21 126 Report of Joint National Committee (JNC 7) because the newer JNC 8 report renewed only  
22  
23 127 their treatment targets, not their classifications. The SBP of 120–139 mmHg and/or DBP of  
24  
25 128 80–89 mmHg are defined as prehypertension, while SBP of  $\geq 140$  mmHg and/or DBP of  $\geq 90$   
26  
27 129 mmHg are defined as hypertension.[21]

28  
29  
30 130 For further analysis, we applied the 2017 ACC/AHA guideline, which classifies BP as  
31  
32 131 follows: (1) normal BP = SBP  $< 120$  mmHg and DBP  $< 80$  mmHg, (2) elevated BP = SBP  
33  
34 132 120–129 mmHg and DBP  $< 80$  mmHg, (3) stage 1 hypertension = SBP 130–139 mmHg or  
35  
36 133 DBP 80–89 mmHg, and (4) stage 2 hypertension = SBP  $\geq 140$  mmHg or DBP  $\geq 90$  mmHg.[22]

### 37 134 ***Serum Uric Acid Cut-off Point***

38  
39  
40 135 Based on the study by Sja'bani (2014), the cut-off point of SUA was divided into 3  
41  
42 136 categories: normal ( $< 5$  mg/dL), high-normal (5–7 mg/dL), and high ( $\geq 7$  mg/dL).[23]

### 43 137 ***Data Collection***

44  
45  
46 138 The data collection was conducted twice during the study period. The first data  
47  
48 139 collection was conducted in 2007 to collect the prehypertension population (n=4,190). The  
49  
50 140 second data collection was performed in 2017 to collect samples from the Mlati Study  
51  
52 141 Database by the random sampling method (n=733).

1  
2  
3 142 In 2007, interviews were conducted on 12,073 subjects to obtain demographic data  
4  
5 143 (e.g. sex and age), family history and to perform physical and laboratory examinations.  
6  
7 144 Physical examinations, which included measurements of morning home BP (measured by  
8  
9 145 using sphygmomanometer), body weight, body height, upper-hand circumference, wrist  
10  
11 146 circumference, abdominal circumference and hip circumference, were conducted on day 1 in  
12  
13 147 subject's house or their neighbor. BP measurements were performed in the morning (at 6 – 8  
14  
15 148 a.m) by the medical team for 2 times (or until stable BP were obtained) while subjects in  
16  
17 149 sitting position. On day 2, we examined morning home BP and took urine and blood samples.  
18  
19  
20  
21

22 150 In 2017, we collected data from 733 subjects, including interviews of demographic  
23  
24 151 data, physical and laboratory examinations. On the first day, subjects were interviewed,  
25  
26 152 physically examined, and given urine containers for one-time urine samples, as well as for a  
27  
28 153 24-h urine collection that had to be submitted on day 2, in their home or neighbour. The  
29  
30 154 physical examination was performed by medical team, consisted of a morning home BP  
31  
32 155 measurement in the morning (at 6 – 8 a.m) for 2 times (or until stable BP were obtained),  
33  
34 156 while subjects in sitting position, using the Omron HEM-907 digital automatic blood pressure  
35  
36 157 monitor (manufactured by Omron Healthcare Co., Ltd, Kyoto, Japan) and measurements of  
37  
38 158 body weight, body height, upper-hand circumference, wrist circumference, abdominal  
39  
40 159 circumference and hip circumference. On the second day, subjects who were in fasting  
41  
42 160 condition were invited to come to the neighbor's hall in the morning and physically examined  
43  
44 161 for BP again (at 6 – 8 a.m) and drawn for their blood. Urine and blood samples were  
45  
46 162 examined in the laboratory (Prodia Laboratory, Yogyakarta, Indonesia). A 24-h urine sample  
47  
48 163 was collected to measure uric acid excretion and creatinine, and a blood sample was collected  
49  
50 164 to measure SUA, blood urea nitrogen, creatinine, a lipid profile (total cholesterol, low density  
51  
52 165 lipoprotein/LDL-C, high density lipoprotein/HDL-C and triglycerides), and fasting blood  
53  
54 166 glucose levels.  
55  
56  
57  
58  
59  
60

1  
2  
3 167 ***Statistical Analysis***  
4

5 168 All data presented later in results section were from data collection in 2017. Data were  
6  
7  
8 169 analysed using IBM SPSS Statistics 20. The data consisted of continuous and categorical  
9  
10 170 data, which were expressed as the mean (SD) for continuous data and as numbers and  
11  
12 171 percentages for categorical data. The continuous variables were analysed and compared by  
13  
14 172 independent samples t-tests and nonparametric Mann-Whitney U tests. The categorical  
15  
16 173 variables were analysed and compared by Pearson chi-square tests. Multivariable analysis  
17  
18 174 was performed using multiple linear regression to describe the association between SUA  
19  
20 175 levels and BP, with adjustment for age and cardiovascular risk factors. The significance of  
21  
22 176 associations between categorical variables and numerical variables were determined using  
23  
24 177 95% confidence intervals (CIs).  
25  
26  
27  
28  
29  
30  
31  
32  
33  
34  
35  
36  
37  
38  
39  
40  
41  
42  
43  
44  
45  
46  
47  
48  
49  
50  
51  
52  
53  
54  
55  
56  
57  
58  
59  
60

178 **RESULTS****Table 1.** Characteristic of Subjects by Gender Presented in Mean (SD)<sup>a</sup>

| Variables                     | Men<br>n=306 | Women<br>n=427 | p-value |
|-------------------------------|--------------|----------------|---------|
| Age (years)                   | 46 (7.71)    | 46 (7.76)      | 0.431   |
| 30 – 39 years                 | 35 (2.86)    | 36(2.63)       | 0.093   |
| 40 – 49 years                 | 45 (2.89)    | 45 (2.67)      | 0.372   |
| 50 – 59 years                 | 54 (3.18)    | 54 (2.77)      | 0.779   |
| BMI (kg/m <sup>2</sup> )      | 23.5 (3.70)  | 25.7 (4.81)    | <0.001* |
| SBP (mmHg)                    | 132 (17.26)  | 134 (21.62)    | 0.595   |
| DBP (mmHg)                    | 78 (11.96)   | 79 (12.32)     | 0.091   |
| Uric Acid (mg/dL)             | 5.8 (1.25)   | 4.5 (1.10)     | <0.001* |
| Total cholesterol (mg/dL)     | 167 (36.86)  | 166 (41.59)    | 0.559   |
| LDL (mg/dL)                   | 109 (29.59)  | 106 (33.27)    | 0.155   |
| HDL (mg/dL)                   | 41 (10.02)   | 47 (12.20)     | <0.001* |
| Triglyceride (mg/dL)          | 129 (79.09)  | 103 (63.84)    | <0.001* |
| Fasting Blood Glucose (mg/dL) | 100 (37.22)  | 97 (33.70)     | 0.101   |

\*Significant (p&lt;0.05)

<sup>a</sup> Characteristic of subjects collected in 2017

179 The subjects of this study consisted of 733 adults (aged 30–59 years) living in the  
 180 Mlati Subdistrict; 306 (41.75%) and 427 (58.25%) were men and women, respectively. The  
 181 characteristics of the subjects (by gender) are presented in Table 1. There was no significant  
 182 difference in age, SBP, DBP, total cholesterol, LDL and fasting blood glucose between men  
 183 and women (p>0.05). Significant differences were found in body mass index (BMI)  
 184 (p<0.001), SUA levels (p<0.001), HDL (p<0.001) and triglycerides (p<0.001). BMI and  
 185 HDL were significantly higher in women, whereas SUA levels and triglycerides were  
 186 significantly higher in men.

**Table 2.** Blood Pressure after 10 years and Serum Uric Acid Frequency Distribution

| Variables                | Frequency (%) |            |
|--------------------------|---------------|------------|
|                          | 2007          | 2017       |
| BP (n=733)               |               |            |
| Normal                   | 0             | 180 (24.6) |
| Prehypertension (Pre-HT) | 733 (100)     | 325 (44.3) |
| Hypertension (HT)        | 0             | 228 (31.1) |
| Uric Acid (n=733)        |               |            |
| Normal                   | -             | 369 (50.3) |
| High-normal              | -             | 316 (43.1) |
| High                     | -             | 48 (6.6)   |

187 After 10 years, among the 733 prehypertensive subjects, 180 (24.6%) returned to  
 188 normal blood pressure, 325 (44.3%) remained in a prehypertensive state, and 228 (31.1%)  
 189 became hypertensive. For SUA levels, 50.3% had normal SUA, 43.1% were high-normal,  
 190 and only 6.6% had high SUA levels (Table 2).

**Table 3.** Association between Gender, Age, BMI, Uric Acid Excretion, and Uric Acid Concentration to Serum Uric Acid Level

| Variables                               | SUA                      |            | p value | RR   | 95% CI      |
|-----------------------------------------|--------------------------|------------|---------|------|-------------|
|                                         | High-normal and high (%) | Normal (%) |         |      |             |
| Gender                                  |                          |            |         |      |             |
| Men                                     | 237 (32.3)               | 69 (9.4)   | <0.001  | 2.60 | 2.22-3.05   |
| Women                                   | 127 (17.3)               | 300 (40.9) |         |      |             |
| Age                                     |                          |            |         |      |             |
| Men                                     |                          |            |         |      |             |
| 30 – 39 years*                          | 52 (17.0)                | 11 (3.6)   | -       | 1    | -           |
| 40 – 49 years                           | 104 (34.0)               | 22 (7.2)   | 1,000   | 1.00 | 0.87-1.15   |
| 50 – 59 years                           | 81 (26.5)                | 36 (11.8)  | 0.053   | 0.84 | 0.71-0.99   |
| Women                                   |                          |            |         |      |             |
| 30 – 39 years*                          | 22 (5.2)                 | 85 (19.9)  | -       | 1    | -           |
| 40 – 49 years                           | 40 (9.4)                 | 128 (30.0) | 0.530   | 1.16 | 0.73-1.84   |
| 50 – 59 years                           | 65 (15.2)                | 87 (20.4)  | <0.001  | 2.08 | 1.37-3.15   |
| BMI <sup>a</sup>                        |                          |            |         |      |             |
| Overweight-Obese                        | 171 (23.3)               | 154 (21.0) | 0.153   | 1.13 | 0.96 - 1.32 |
| Underweight-normal                      | 193 (26.3)               | 215 (29.3) |         |      |             |
| Uric Acid Excretion (24-h) <sup>b</sup> |                          |            |         |      |             |
| High                                    | 169 (23.1)               | 130 (17.7) | 0.002   | 1.32 | 1.10 - 1.57 |
| Normal                                  | 195 (26.6)               | 239 (32.6) |         |      |             |
| Uric Acid Concentration <sup>c</sup>    |                          |            |         |      |             |
| Normal                                  | 200 (27.3)               | 202 (27.5) | 0.956   | 1.00 | 0.87 – 1.16 |
| High                                    | 164 (22.4)               | 167 (22.8) |         |      |             |

\* reference category

<sup>a</sup>BMI= body mass index, <18.5kg/m<sup>2</sup> = underweight, 18.5-24.9 kg/m<sup>2</sup> = normal, 25-29.9 kg/m<sup>2</sup> = overweight, >30 kg/m<sup>2</sup> = obese

<sup>b</sup>Uric acid excretion, <435.08 mg/day = normal, ≥435.08 mg/day = high

<sup>c</sup>Uric acid concentration (mg per 100 ml of urine), <46.63 mg% = normal, ≥46.63 mg% = high

191  
 192 In men, 32.3% of the subjects had high-normal or high levels of SUA, while in  
 193 women, only 17.3% had high-normal or high levels of SUA. There was a significant  
 194 difference in SUA between men and women (p<0.001, RR=2.60, 95% CI=2.22–3.05). When  
 195 gender was further analysed by age distribution, age was significantly associated with SUA

1  
2  
3 196 levels only in women aged 50–59 years ( $p < 0.001$ ,  $RR = 2.08$ , 95%  $CI = 1.36–3.15$ ).  
4  
5 197 Additionally, there was a significant association between SUA levels and uric acid excretion  
6  
7 198 by 24-h urine ( $p = 0.002$ ,  $RR = 1.32$ , 95%  $CI = 1.10–1.57$ ). On the other hand, no significant  
8  
9 199 association was observed between SUA levels and BMI ( $p = 0.153$ ,  $RR = 1.1$ , 95%  $CI = 0.96–$   
10  
11 200 1.32) or between SUA levels and uric acid concentration ( $p = 0.100$ ,  $RR = 0.786$ , 95%  
12  
13 201  $CI = 0.59–1.05$ ) (Table 3).  
14  
15

16  
17 202 The associations between gender and SUA levels on BP are shown in Table 4. There  
18  
19 203 was no significant association between gender and BP ( $p = 0.584$ ). To examine the association  
20  
21 204 between uric acid and hypertension, we compared SUA levels and morning home BP. The  
22  
23 205 association between SUA levels and BP was statistically significant ( $p = 0.008$ ,  $RR = 1.12$ , 95%  
24  
25 206  $CI = 1.03–1.22$ ). The risk of subjects with high-normal or high SUA levels for becoming  
26  
27 207 prehypertension or hypertension was 1.12 times higher than those who has normal SUA  
28  
29 208 levels. Furthermore, the association between SUA levels and BP in men and women is also  
30  
31 209 described in Table 4. In men, SUA levels were not significantly associated with BP ( $p = 0.805$ ,  
32  
33 210  $RR = 1.02$ , 95%  $CI = 0.88–1.19$ ). However, there was a significant association between SUA  
34  
35 211 levels and BP in women ( $p = 0.001$ ,  $RR = 1.21$ , 95%  $CI = 1.09–1.34$ ). In women, the risk of  
36  
37 212 having prehypertension or hypertension was 1.21 times higher in those who had high-normal  
38  
39 213 or high SUA levels than those with normal SUA levels. Additional analysis using 2017  
40  
41 214 ACC/AHA guideline for observing the associations between gender and SUA levels on BP  
42  
43 215 also showed similar results with the previous analysis using JNC 7 guideline regarding the  
44  
45 216 significant associations between SUA levels and BP.  
46  
47  
48  
49  
50  
51  
52  
53  
54  
55  
56  
57  
58  
59  
60

**Table 4.** Association between Gender and Serum Uric Acid on Blood Pressure

| Variables            | Blood Pressure     |            |        |                    |                           |                         |        |                    |
|----------------------|--------------------|------------|--------|--------------------|---------------------------|-------------------------|--------|--------------------|
|                      | JNC 7 <sup>a</sup> |            |        |                    | 2017 ACC/AHA <sup>b</sup> |                         |        |                    |
|                      | Pre-HT and HT (%)  | Normal (%) | p      | RR (95%CI)         | HT-1 and HT-2 (%)         | Normal and elevated (%) | p      | RR (95%CI)         |
| Gender               |                    |            |        |                    |                           |                         |        |                    |
| Men                  | 234 (31.9)         | 72 (9.8)   | 0.584  | 1.02 (0.94 – 1.11) | 159 (21.7)                | 147 (20.1)              | 0.129  | 0.9 (0.79 - 1.03)  |
| Women                | 319 (43.5)         | 108 (14.7) |        |                    | 246 (33.6)                | 181 (24.7)              |        |                    |
| SUA                  |                    |            |        |                    |                           |                         |        |                    |
| High-normal and High | 290 (39.6)         | 74 (10.1)  | 0.008* | 1.12 (1.03 - 1.22) | 224 (30.6)                | 140 (19.1)              | 0.001* | 1.26 (1.10 - 1.43) |
| Normal               | 263 (35.9)         | 106 (14.5) |        |                    | 181 (24.7)                | 188 (25.6)              |        |                    |
| SUA                  |                    |            |        |                    |                           |                         |        |                    |
| Men                  |                    |            |        |                    |                           |                         |        |                    |
| High-normal and High | 182 (59.5)         | 55 (18.0)  | 0.805  | 1.02 (0.88 – 1.19) | 129 (42.2)                | 108 (35.3)              | 0.109  | 1.25 (0.93 – 1.68) |
| Normal               | 52 (17.0)          | 17 (5.6)   |        |                    | 30 (9.8)                  | 39 (12.7)               |        |                    |
| Women                |                    |            |        |                    |                           |                         |        |                    |
| High-normal and High | 108 (25.3)         | 19 (4.4)   | 0.001* | 1.21 (1.09 – 1.34) | 95 (22.2)                 | 32 (7.5)                | 0.000* | 1.49 (1.28 – 1.73) |
| Normal               | 211 (49.4)         | 89(20.8)   |        |                    | 151 (35.4)                | 149 (34.9)              |        |                    |

<sup>a</sup> BP was categorized using the JNC 7 Guideline (prehypertension: SBP of 120–139 mmHg and/or DBP of 80–89 mmHg, hypertension: SBP of  $\geq$ 140 mmHg and/or DBP of  $\geq$ 90 mmHg)

<sup>b</sup> BP was categorized using the 2017 ACC/AHA Guideline (normal BP = SBP <120 mmHg and DBP <80 mmHg, elevated BP = SBP 120-129 mmHg and DBP <80 mmHg, stage 1 hypertension = SBP 130-139 mmHg or DBP 80-89 mmHg, stage 2 hypertension = SBP  $\geq$ 140 mmHg or DBP  $\geq$ 90 mmHg)



Figure 2 shows the association between SUA and cardiovascular risk factors. The SUA levels were significantly associated with total cholesterol ( $p=0.001$ ), LDL ( $p=0.002$ ), HDL ( $p<0.001$ ), triglycerides ( $p<0.001$ ) and fasting blood glucose ( $p=0.030$ ). Subjects with high-normal and high SUA levels had significantly higher total cholesterol, LDL, and triglyceride levels than subjects with normal SUA levels. On the other hand, HDL and fasting blood glucose were statistically lower among subjects with high-normal and high SUA levels than among those with normal SUA levels.

The relationships between SUA levels and cardiovascular risk factors among men and women are presented in Figure 3. In men, there were significant differences in BMI ( $p<0.001$ ) and triglycerides ( $p=0.002$ ) between subjects with normal SUA levels and those with high-normal and high SUA levels. In women, there was no significant differences in all cardiovascular risk factors ( $p>0.05$ ) between subjects with normal SUA levels and those with high-normal and high SUA levels.

**Table 5.** Multiple Linear Regression of Association of Age, Cardiovascular Risk Factors and SUA on Blood Pressure

| Variables             | Blood Pressure of Men |         |               |         | Blood Pressure of Women |         |               |         |
|-----------------------|-----------------------|---------|---------------|---------|-------------------------|---------|---------------|---------|
|                       | Systolic              |         | Diastolic     |         | Systolic                |         | Diastolic     |         |
|                       | Coef. $\beta$         | p-value | Coef. $\beta$ | p-value | Coef. $\beta$           | p-value | Coef. $\beta$ | p-value |
| Age                   | 0.704                 | <0.001* | 0.336         | <0.001* | 0.674                   | <0.001* | -0.017        | 0.817   |
| SUA                   | -0.247                | 0.745   | 0.582         | 0.267   | 4.527                   | <0.001* | 2.223         | <0.001* |
| BMI                   | 1.602                 | <0.001* | 1.295         | <0.001* | 0.929                   | <0.001* | 0.722         | <0.001* |
| Total Cholesterol     | 0.044                 | 0.696   | 0.042         | 0.591   | 0.119                   | 0.279   | 0.030         | 0.643   |
| LDL                   | -0.074                | 0.529   | -0.036        | 0.657   | -0.102                  | 0.365   | -0.014        | 0.828   |
| HDL                   | 0.184                 | 0.174   | 0.042         | 0.653   | -0.054                  | 0.656   | -0.049        | 0.483   |
| Triglycerides         | -0.005                | 0.828   | -0.001        | 0.941   | -0.029                  | 0.280   | 0.006         | 0.721   |
| Fasting Blood Glucose | 0.032                 | 0.213   | -0.001        | 0.941   | 0.098                   | 0.001*  | 0.040         | 0.020*  |

\*Significant ( $p<0.05$ )

SUA=Serum uric acid, BMI=Body mass index, LDL=Low density lipoprotein, HDL=High density lipoprotein

Multivariable analysis was conducted to describe the association between SUA levels and BP, with adjustment for age and cardiovascular risk factors. Cardiovascular risk factors

1  
2  
3 234 such as BMI, total cholesterol, LDL, HDL, triglycerides, and fasting blood glucose were all  
4  
5 235 taken into account for adjustment in multiple linear regression (Table 5). Age, BMI, fasting  
6  
7 236 blood glucose, and SUA levels were significantly associated with BP. Significant association  
8  
9  
10 237 were found between age and SBP both in men ( $p<0.001$ ) and women ( $p<0.001$ ), and DBP  
11  
12 238 only in men ( $p<0.001$ ). BMI was significantly associated with SBP and DBP both in men  
13  
14 239 ( $p<0.001$  and  $p<0.001$ ) and women ( $p<0.001$  and  $p<0.001$ ). In addition, fasting blood glucose  
15  
16 240 was found to be associated with SBP and DBP in women ( $p=0.001$  and  $p=0.020$ ). Regarding  
17  
18 241 SUA levels, SUA was significantly associated with both SBP and DBP in women ( $p<0.001$   
19  
20 242 and  $p<0.001$ , respectively) but such association was not found in men.  
21  
22  
23  
24 243  
25  
26

## 27 244 **DISCUSSION**

28  
29  
30 245 This study consisted of two parts of data collection. The first data collection was  
31  
32 246 performed in 2007 to gather data on the prehypertension population ( $n=4,190$ ); this study was  
33  
34 247 later called the “Mlati Study Database”. In 2017, after 10 years, the second data collection  
35  
36 248 was performed to gather samples from the Mlati Study Database by a random sampling  
37  
38 249 method ( $n=733$ ) to show the change in BP status from prehypertension to hypertension. The  
39  
40 250 data collection in 2017 also aimed to show the association between uric acid (serum, urinary  
41  
42 251 excretion, and concentrate) and hypertension.  
43  
44  
45

46 252 The results of our study showed that gender and uric acid excretion (by 24-h urine)  
47  
48 253 were significantly associated with SUA levels. The mean SUA levels in men were  
49  
50 254 significantly higher than those in women. In addition, subjects with high-normal and high  
51  
52 255 SUA levels had a risk of having prehypertension and hypertension that was 1.12 times higher  
53  
54 256 than those with normal SUA levels. When analysed by gender, high-normal and high SUA  
55  
56 257 levels were significantly associated with prehypertension and hypertension only in women.  
57  
58 258 The relationship between SUA levels and the development of hypertension or renal disease  
59  
60

1  
2  
3 259 had been shown in several previous studies. This relationship was significantly higher in  
4  
5 260 women than in men.[15,24]  
6  
7

8 261 The study by Kawabe *et al.* revealed that in women, the older the age was, the higher  
9  
10 262 the quartile of SUA, but in men, the quartile of SUA did not increase with age. However, an  
11  
12 263 increase in the quartile of SUA along with higher BMI was only found in men but not in  
13  
14 264 women. Additionally, the mean value of SUA in men was higher than in women.[25] These  
15  
16 265 results were consistent with our finding that SUA levels were significantly higher in men and  
17  
18 266 that SUA levels were significantly associated with higher BMI in men. However, the study  
19  
20 267 populations in this study and in the study by Kawabe *et al.* were different in terms of the age  
21  
22 268 group examined, which were adults (30–59 years old) and elderly adults, respectively.[25]  
23  
24 269 Similar finding was also found by Zhang, *et al.* which reported that SUA levels were  
25  
26 270 statistically higher in men than in women, though the SUA level did not increase with the age  
27  
28 271 both in men and women.[26] These studies results were consistent with our finding which  
29  
30 272 stated that SUA level was significantly higher in men and SUA level was significantly  
31  
32 273 associated with higher BMI also in men. However, the study population in this study and in  
33  
34 274 the study by Kawabe, *et al.* was different in the age group which were adults (30-59 years)  
35  
36 275 and elderly, respectively.  
37  
38  
39  
40  
41

42 276 Chen *et al.* reported a different result in a cross-sectional analysis regarding the  
43  
44 277 association between SUA levels and the presence of hypertension when analysed by gender.  
45  
46 278 For the total population, SUA levels had significant associations with hypertension. The  
47  
48 279 levels of SUA had a significant relationship with hypertension in men aged <30 years, 30–40  
49  
50 280 years, and >40 years but only in women aged >40 years.[10] This situation could be  
51  
52 281 explained with Table 3, which provides the age distribution of women and its association  
53  
54 282 with SUA levels. In Table 3, the proportion of women aged 40–49 years combined with those  
55  
56 283 aged 50–59 years having high-normal and high SUA levels was 24.6%. This age range in  
57  
58  
59  
60

1  
2  
3 284 women is associated with menopausal problems. A study by Hak *et al.* stated that menopause  
4  
5 285 was associated with an increased risk of incident gout, which may help explain why the age  
6  
7 286 of the women in this study could play a significant role in their SUA levels.[27]  
8  
9

10 287       Regarding the cardiovascular risk factors, the result of this study found that the SUA  
11  
12 288 levels were significantly associated with total cholesterol ( $p=0.001$ ), LDL ( $p=0.002$ ), HDL  
13  
14 289 ( $p<0.001$ ), triglycerides ( $p<0.001$ ) and fasting blood glucose ( $p=0.030$ ), regardless of gender.  
15  
16 290 When the data were analysed by gender, significant differences were found only in BMI and  
17  
18 291 triglycerides and only in men ( $p<0.001$  and  $p=0.002$ , respectively). Another study has shown  
19  
20 292 a stronger association between the increasing of SUA level and cardiovascular mortality  
21  
22 293 among women in healthy subjects compared to men.[28] Meta-analysis showed that there  
23  
24 294 was significant association between hyperuricemia and cardiovascular mortality in women,  
25  
26 295 but not in men.[29] Chen *et al.* reported that SUA levels were significantly associated with  
27  
28 296 the occurrence of metabolic syndrome and hypertension in the total population. In men, SUA  
29  
30 297 levels had a positive association with the occurrence of metabolic syndrome in the age groups  
31  
32 298 of  $<30$  and  $30-40$ . In women, SUA levels were significantly associated with the occurrence  
33  
34 299 of metabolic syndrome in the age groups of  $<30$  and  $>40$ .[10]  
35  
36  
37  
38  
39

40 300       In this study, BMI was significantly associated with SBP and DBP in both gender.  
41  
42 301 This finding was in line with those of a previous study by Droyvold *et al.*, in which the  
43  
44 302 authors reported that an increase in BMI was associated with increased BP in men and  
45  
46 303 women.[30] With regard to the association between BMI and SUA levels, our findings were  
47  
48 304 different from those of a report by Rodrigues *et al.*, in which the authors reported a  
49  
50 305 significant correlation between BMI and SUA levels in both men and women.[31] The link  
51  
52 306 between BMI and hyperuricaemia has not been well elucidated; however, insulin resistance  
53  
54 307 might be the bridging gap. Obese people are more likely to have metabolic syndrome, and  
55  
56 308 metabolic syndrome itself is associated with insulin resistance. It is thought that insulin  
57  
58  
59  
60

1  
2  
3 309 resistance impairs the ability of the kidney to excrete uric acid and therefore leads to  
4  
5 310 hyperuricaemia.[32]  
6

7  
8 311 This study found that fasting blood glucose was associated with SBP and DBP only in  
9  
10 312 women. The same result was observed in a study by Yan *et al.*, which revealed that fasting  
11  
12 313 plasma glucose was independent of both SBP and DBP.[33] Fasting blood glucose was also  
13  
14 314 associated with SUA levels, but when analysed by gender, no significant different was found.  
15  
16 315 This finding is contradictory to those of a study by Kawamoto *et al.*, which revealed that  
17  
18 316 SUA levels were associated with fasting plasma glucose in females.[34] The mechanism of  
19  
20 317 how this phenomenon occurred remains unclear, and further study is needed to observe a  
21  
22 318 cause-effect relationship. Serum triglycerides were also associated with SUA levels in this  
23  
24 319 study. The relationship between SUA levels and lipid profiles has been described in various  
25  
26 320 studies, but the exact mechanism remains unclear. A study by Peng *et al.* revealed that all  
27  
28 321 lipid profile parameters, including triglycerides but not HDL cholesterol, were associated  
29  
30 322 with SUA levels.[35] SUA levels were associated with both SBP and DBP but only in  
31  
32 323 women. This result is similar to those of previous studies.[34, 36] It has been suggested that  
33  
34 324 the mechanism by which uric acid causes hypertension is due to endothelial dysfunction after  
35  
36 325 oxidative stress damage to the endothelium during excessive uric acid formation.[36]  
37  
38  
39  
40  
41

42 326 There were several limitations in this study. First, subject in this study were collected  
43  
44 327 from database made in 2007. From 1500 subjects randomly selected in the beginning of this  
45  
46 328 study, only 733 subjects joined and attend the 2-days examination. More than half of the  
47  
48 329 selected subjects did not attend the examination invitation due to several reasons, thus, this  
49  
50 330 had lessened the total samples of subjects of this study. Second, this study could not present  
51  
52 331 the changes of all measured value over 10-year period because in the prior study in 2007,  
53  
54 332 these laboratory value were not examined, except for blood pressure. Therefore, only the  
55  
56 333 changes on blood pressure which can be presented on the results. Third, the instruments used  
57  
58  
59  
60

1  
2  
3 334 to measure blood pressure in 2007 and 2017 were different. In 2007, we used  
4  
5 335 sphygmomanometer, whereas in 2017 we used digital automatic blood pressure monitor.  
6  
7  
8 336 Thus, this may lead bias in blood pressure data measurement between 2007 and 2017.  
9

10 337

## 11 338 **CONCLUSION**

12  
13  
14 339 In conclusion, after 10 years of follow-up, the SUA levels in men are significantly  
15  
16 340 higher than those in women. Moreover, high-normal and high SUA levels were significantly  
17  
18 341 associated with prehypertension and hypertension in women but not in men. For the total  
19  
20 342 population, SUA levels were significantly associated with the levels of total cholesterol,  
21  
22 343 LDL, HDL, triglycerides and fasting blood glucose. The BMI was found to be significantly  
23  
24 344 associated with BP in both men and women. Fasting blood glucose is significantly associated  
25  
26 345 with SBP in men and with SBP and DBP in women; meanwhile, SUA levels were  
27  
28 346 significantly associated with BP only in women.  
29  
30  
31  
32

33 347

## 34 348 **ACKNOWLEDGEMENTS**

35  
36  
37 349 We would like to thank the Mlati Study Group, which assisted in this research. We would  
38  
39 350 also like to thank Prodia Laboratory for performing laboratory examinations.  
40  
41

## 42 351 **CONTRIBUTORS**

43  
44 352 LAB and MS composed the idea of the study and arranged the study's design. MS, FI, AW,  
45  
46 353 and AK obtained the data. ZZ led the statistical analysis with the supervision of MS. MS,  
47  
48 354 LAB and ZZ wrote the first draft of this paper and all authors read, revised, and approved the  
49  
50 355 final manuscript.  
51  
52

## 53 356 **FUNDING**

54  
55  
56 357 This research was supported by the Mlati Study Group, Faculty of Medicine, University of  
57  
58 358 Gadjah Mada, Indonesia.  
59  
60

1  
2  
3 359 **COMPETING INTEREST**  
4

5 360 There were no conflicts of interest to disclose.  
6  
7

8 361 **DATA SHARING STATEMENT**  
9

10 362 Data may be obtained from the corresponding author upon reasonable request.  
11  
12

13 363  
14

15 364 **REFERENCES**  
16  
17

- 18 365 1. Mills KT, Bundy JD, Kelly TN, *et al.* Global disparities of hypertension prevalence  
19  
20 366 and control: A systematic analysis of population-based studies from 90 countries.  
21  
22 367 *Circulation*. 2016; 134:441-50.  
23  
24 368 2. Annual Health Research Report. Division of Research and Health Development:  
25  
26 Indonesian Ministry of Health. 2013.  
27 369  
28  
29 370 3. Ruchira P, Gajendra Singh M. PS 15-11 Impact of Hypertension on Quality of Life  
30  
31 371 among People Living in an Urban Area of Delhi, India. *J Hypertens* 2016; 34:e462.  
32  
33 372 doi: 10.1097/01.hjh.0000501221.33083.08  
34  
35 373 4. de Carvalho MV, Siqueira LB, Sousa ALL, *et al.* The Influence of Hypertension on  
36  
37 374 Quality of Life. *Arq Bras Cardiol* 2013; 100(2):164-174. doi: 10.5935/abc.20130030  
38  
39 375 5. Cicero AFG, Rosticci M, Fogacci F, *et al.* High Serum Uric Acid is Associated to  
40  
41 376 Poorly Controlled Blood Pressure and Higher Arterial Stiffness in Hypertensive  
42  
43 377 Subjects. *Eur J Int Med* 2017; 37:38–42.  
44  
45 378 6. Jin M, Yang F, Yang I, *et al.* Uric Acid, Hyperuricemia and Vascular Diseases. *Front*  
46  
47 379 *Biosci* 2012; 17:656–69.  
48  
49 380 7. Grayson PC, Kim SY, LaValley M, *et al.* Hyperuricemia and Incident Hypertension:  
50  
51 381 A Systematic Review and Meta-analysis. *Arthritis Care Res* 2011; 63:102–10.  
52  
53  
54  
55  
56  
57  
58  
59  
60



- 1  
2  
3 382 8. Sundström J, Sullivan L, D'Agostino RB, *et al.* Relations of Serum Uric Acid to  
4  
5 383 Longitudinal Blood Pressure Tracking and Hypertension Incidence. *Hypertens* 2005;  
6  
7 384 45:28-33  
8  
9  
10 385 9. Jiang M, Gong D, Fan Y. Serum uric acid levels and risk of prehypertension: a meta-  
11  
12 386 analysis. *Clin Chem Lab Med.* 2016; DOI:10.1515.  
13  
14 387 10. Chen YY, Kao TW, Yang HF, *et al.* The Association of Uric Acid with The Risk of  
15  
16 388 Metabolic Syndrome, Arterial Hypertension or Diabetes in Young Subjects - An  
17  
18 389 Observational Study. *Clin Chim Acta* 2018; 48:68-73.  
19  
20 390 11. Ali N, Mahmood S, Islam F, *et al.* Relationship between Serum Uric Acid and  
21  
22 391 Hypertension: A Cross-sectional Study in Bangladeshi Adults. *Sci Rep* 2019; 9:9061.  
23  
24 392 <https://doi.org/10.1038/s41598-019-45680-4>  
25  
26 393 12. Chen Q, Yin YJ, Chen WY, *et al.* Assessment of The Association between Serum  
27  
28 394 Uric Acid Levels and The Incidence of Hypertension in Nonmetabolic Syndrome  
29  
30 395 Subjects: A prospective Observational Study. *Medicine* 2018; 97:6.  
31  
32 396 13. Lin X, Wang X, Li X, *et al.* Gender- and Age-Specific Differences in The  
33  
34 397 Assocoation of Hyperuricemia and Hypertension: A Cross-Sectional Study. *Int J*  
35  
36 398 *Endocrinol* 2019; <https://doi.org/10.1155/2019/7545137>  
37  
38 399 14. Nishio S, Maruyama Y, Sugano N, *et al.* Gender Interaction of Uric Acid in the  
39  
40 400 Development of Hypertension. *Clin Exp Hypertens* 2018; 40(5):446-451,  
41  
42 401 <https://doi.org/10.1080/10641963.2017.1392556>  
43  
44 402 15. Lee JJ, Ahn JH, Hwang JS, *et al.* Relationship between uric Acid and Blood Pressure  
45  
46 403 in Different Age Groups. *Clin Hypertens* 2015; 21:14, DOI 10.1186/s40885-015-  
47  
48 404 0022-9  
49  
50  
51  
52  
53  
54  
55  
56  
57  
58  
59  
60



- 1  
2  
3 405 16. Culleton BF, Larson MG, Kannel WB, *et al.* Serum Uric Acid and Risk for  
4  
5 406 Cardiovascular Disease and Death: The Framingham Heart Study. *Ann Intern Med*  
6  
7 407 1999; 131:7-13  
8  
9  
10 408 17. Chang CC, Wu CH, Liu LK, *et al.* Association between Serum Uric Acid and  
11  
12 409 Cardiovascular Risk in Nonhypertensive and Nondiabetic Individuals: The Taiwan I-  
13  
14 410 Lan Longitudinal Aging Study. *Sci Rep* 2018; 8:5234, DOI:10.1038/s41598-018-  
15  
16 411 22997-0  
17  
18  
19 412 18. Høiegggen A, Alderman MH, Kjeldsen SE, *et al.* The Impact of Serum uric Acid on  
20  
21 413 Cardiovascular Outcomes in LIFE Study. *Kidney Int* 2004; 65:1041-1049  
22  
23  
24 414 19. Borghi C, Rodriguez-Artalejo F, De Backer G, *et al.* Serum Uric Acid Levels are  
25  
26 415 Associated with Cardiovascular Risk Score: A Post hoc Analysis of the EURIKA  
27  
28 416 Study. *Int J of Cardiol* 2018; 253:167-173  
29  
30  
31 417 20. Rahimi-Sakak F, Maroofi M, Rahmani J, *et al.* Serum Uric Acid and Risk of  
32  
33 418 Cardiovascular Mortality: A Systematic Review and Dose-response Meta-analysis of  
34  
35 419 Cohort Studies of over a Million Participants. *BMC Cardiovasc Disord* 2019; 19:218,  
36  
37 420 <https://doi.org/10.1186/s12872-019-1215-z>  
38  
39  
40 421 21. Chobanian AV, Bakris GL, Black HR, *et al.* The Seventh Report of The JNC on  
41  
42 422 Prevention, Detection and Treatment of High Blood Pressure: The JNC 7 Report. *J*  
43  
44 423 *Am Med Assoc* 2003; 289(19): 2560-72.  
45  
46  
47 424 22. Whelton PK, Carey RM, Aronow WS, *et al.* 2017 ACC/AHA/AAPA/ABC/ACPM/  
48  
49 425 AGS/APhA/ASH/ASPC/NMA/PCNA Guideline for the Prevention, Detection,  
50  
51 426 Evaluation, and Management of High Blood Pressure in Adults: Executive Summary.  
52  
53 427 A Report of the American College of Cardiology/American Heart Association Task  
54  
55 428 Force on Clinical Practice Guidelines. *Hypertension* 2018; 71(6):1269-1324.  
56  
57  
58  
59  
60

- 1  
2  
3 429 23. Sja'bani M. Hypertension and Renoprotective Effects of High Serum Uric Acid  
4  
5 430 Treatment. In Annual Scientific Meeting of Indonesian Nephrology in Palembang.  
6  
7 431 South Sumatra, Indonesia: Lembaga Penerbit Ilmu Penyakit Dalam, Bagian Ilmu  
8  
9 432 Penyakit Dalam Fakultas Kedokteran UNSRI, Palembang. 2014.
- 10  
11  
12 433 24. Zhang W, Sun K, Yang Y, *et al.* Plasma Uric Acid and  
13  
14 434 Hypertension in a Chinese Community: Prospective Study and Meta-Analysis. *Clin*  
15  
16 435 *Chem* 2009; 55:2026–34.
- 17  
18  
19 436 25. Kawabe M, Sato A, Hoshi T, *et al.* Gender Differences in The Association Between  
20  
21 437 Serum Uric Acid and Prognosis in Patients with Acute Coronary Syndrome. *J Cardiol*  
22  
23 438 2016; 67:170–176.
- 24  
25  
26 439 26. Zhang C, Liu R, Yuan J, *et al.* Gender-related Differences in The Association  
27  
28 440 between Serum Uric Acid and Left Ventricular Mass Index in Patients with  
29  
30 441 Obstructive Hypertrophic Cardiomyopathy. *Biol Sex Differ* 2016; 7:22.
- 31  
32  
33 442 27. Hak AE, Curhan GC, Grodstein F, *et al.* Menopause, post-menopausal hormone use  
34  
35 443 and risk of incident gout. *Ann Rheum Dis* 2010;69(7):1305-9.
- 36  
37  
38 444 28. Freedman DS, Williamson DF, Gunter EW, *et al.* Relation of serum uric acid to  
39  
40 445 mortality and ischemic heart disease. The NHANES I Epidemiologic Followup Study.  
41  
42 446 *Am J Epidemiol* 1995; 141:637–44.
- 43  
44  
45 447 29. Kim SY, Guevara JP, Kim KM, *et al.* Hyperuricemia and coronary heart disease: a  
46  
47 448 systematic review and meta-analysis. *Arthritis Care Res (Hoboken)* 2010; 62:170–80.
- 48  
49 449 30. Droyvold WB, Midtjhell K, Nilsen TIL, *et al.* Change in Body Mass Index and Its  
50  
51 450 Impact on Blood Pressure: A Prospective Population Study. *Int J Obes.* 2005; 29:650-  
52  
53 451 655.
- 54  
55  
56  
57  
58  
59  
60

- 1  
2  
3 452 31. Rodrigues SL, Baldo MP, Capingana DP, *et al.* Gender Difference of Serum Uric  
4  
5 453 Acid and Cardiovascular Risk Factors: Population Based Study. *Arq Bras Cardiol.*  
6  
7 454 2011.  
8  
9  
10 455 32. Li C, Hsieh MC, Chang SJ. Metabolic Syndrome, Diabetes, and Hyperuricemia. *Curr*  
11  
12 456 *Opin Rheumatol.* 2013; 25:210-216.  
13  
14 457 33. Yan Q, Sun D, Li X, *et al.* Association of Blood Glucose Level and Hypertension in  
15  
16 458 Elderly Chinese Subjects: A Community Based Study. *BMC Endocr Disord.* 2016;  
17  
18 459 16:40.  
19  
20  
21 460 34. Kawamoto R, Tabara Y, Kohara K, *et al.* Serum Uric Acid is More Strongly  
22  
23 461 Associated with Impaired Fasting Blood Glucose in Women Than in Men From A  
24  
25 462 Community-Dwelling Population. *PLoS One.* 2013; 8(6):1-5.  
26  
27  
28 463 35. Peng TC, Wang CC, Kao TW, *et al.* Relationship between Hyperuricemia and Lipid  
29  
30 464 Profiles in US Adults. *BioMed Res Int.* 2015.  
31  
32  
33 465 36. Maruhashi T, Nakashima A, Soga J, *et al.* Hyperuricemia is Independently Associated  
34  
35 466 with Endothelial Dysfunction in Post-Menopausal Women but not in Pre-Menopausal  
36  
37 467 Women. *BMJ Open.* 2013; 3:e003659.  
38  
39  
40 468  
41  
42 469  
43  
44 470  
45  
46  
47  
48  
49  
50  
51  
52  
53  
54  
55  
56  
57  
58  
59  
60

1  
2  
3 **471 Figure Legend**  
4

5  
6 472 Figure 2. The SUA/serum uric acid levels were significantly associated with total cholesterol  
7  
8 473 ( $p=0.001$ ), LDL/low density lipoprotein ( $p=0.002$ ), HDL/high density lipoprotein ( $p<0.001$ ),  
9  
10 474 triglycerides ( $p<0.001$ ) and fasting blood glucose ( $p=0.030$ ). The SUA category: normal ( $<5$   
11  
12 475 mg/dL), high-normal ( $5-7$  mg/dL), and high ( $\geq 7$  mg/dL).

14 476 Figure 3. Significant differences were found in BMI ( $p<0.001$ ) and triglycerides ( $p=0.002$ )  
15  
16  
17 477 between subjects with normal SUA levels and those with high-normal and high SUA levels in  
18  
19 478 men. No significant difference was found ( $p>0.05$ ) between subjects with normal SUA levels  
20  
21 479 and those with high-normal and high SUA levels in women. The SUA category: normal ( $<5$   
22  
23 480 mg/dL), high-normal ( $5-7$  mg/dL), and high ( $\geq 7$  mg/dL).  
24  
25

26 481  
27  
28  
29  
30  
31  
32  
33  
34  
35  
36  
37  
38  
39  
40  
41  
42  
43  
44  
45  
46  
47  
48  
49  
50  
51  
52  
53  
54  
55  
56  
57  
58  
59  
60

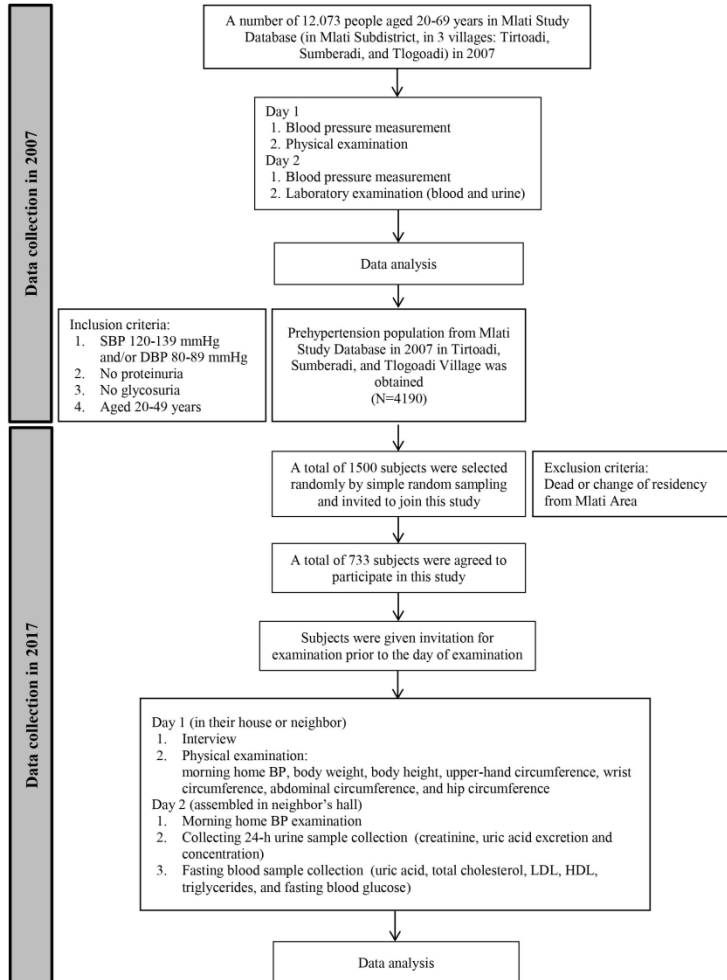

Fig 1. Study Flow Chart

Fig 1. Study Flow Chart

210x297mm (300 x 300 DPI)

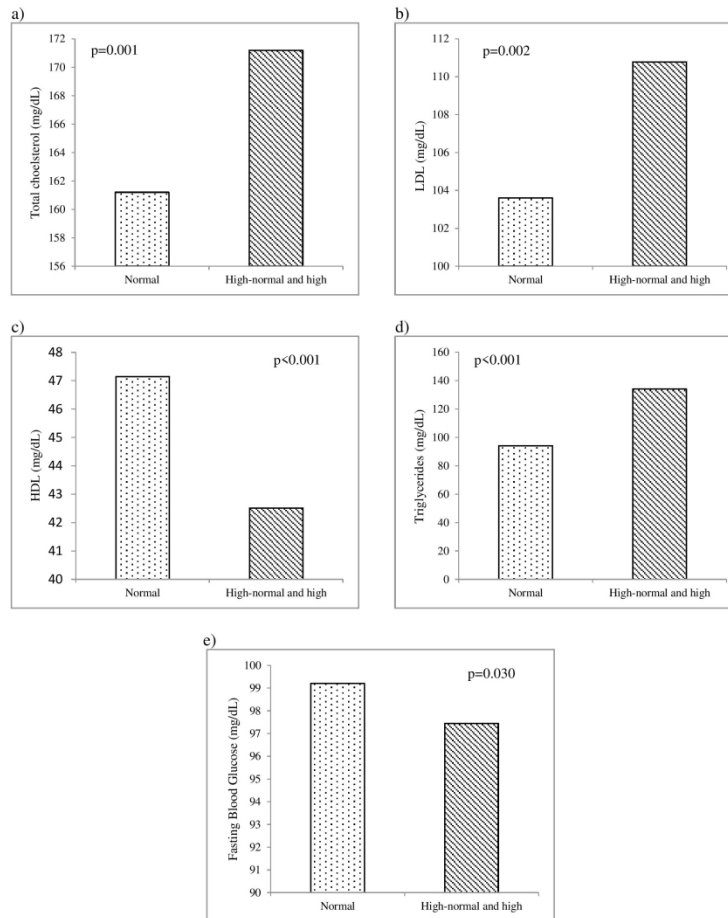

**Fig. 2.** Mean of cardiovascular risk factors in different serum uric acid levels  
The SUA/serum uric acid levels were significantly associated with total cholesterol ( $p=0.001$ ), LDL/low density lipoprotein ( $p=0.002$ ), HDL/high density lipoprotein ( $p<0.001$ ), triglycerides ( $p<0.001$ ) and fasting blood glucose ( $p=0.030$ ).

Figure 2. Mean of cardiovascular risk factors in different serum uric acid levels

210x297mm (300 x 300 DPI)

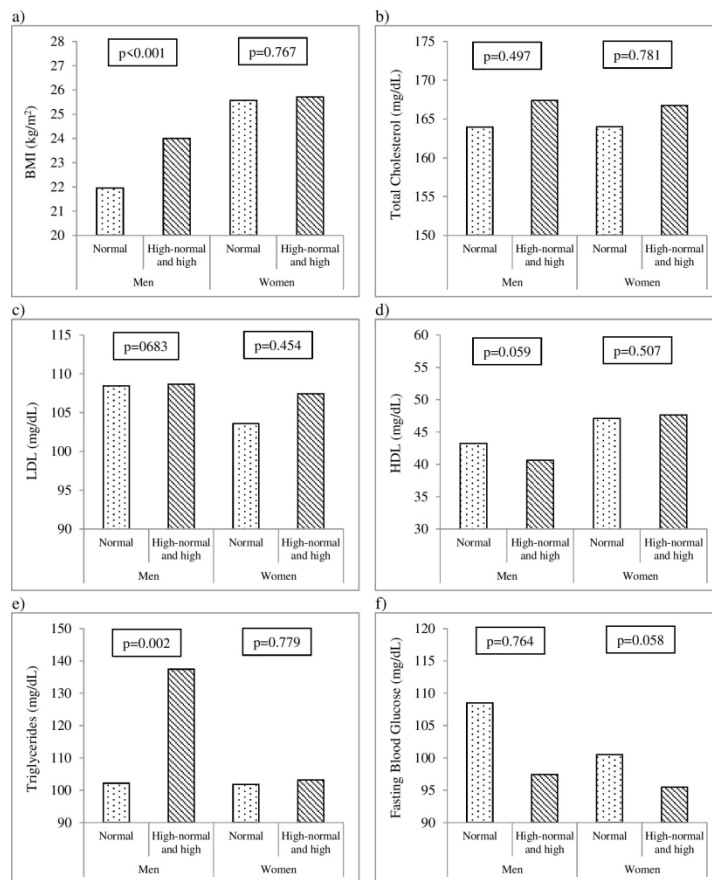

**Fig. 3.** Mean of cardiovascular risk factors in men and women between normal and high-normal/high SUA levels. In men, BMI, LDL, triglyceride and fasting blood glucose values were analysed using the Mann-Whitney U test; total cholesterol and HDL levels were analysed using independent samples t-tests. In women, BMI, total cholesterol, LDL, HDL and triglyceride levels were analysed using the Mann-Whitney U test; fasting blood glucose was analysed using independent samples t-tests.

Figure 3. Mean of cardiovascular risk factors in men and women between normal and high-normal/high SUA levels.

210x297mm (300 x 300 DPI)

**STROBE 2007 (v4) Statement—Checklist of items that should be included in reports of *cross-sectional studies***

| Section/Topic                | Item # | Recommendation                                                                                                                                                                       | Reported on page # |
|------------------------------|--------|--------------------------------------------------------------------------------------------------------------------------------------------------------------------------------------|--------------------|
| <b>Title and abstract</b>    | 1      | (a) Indicate the study's design with a commonly used term in the title or the abstract                                                                                               | 2                  |
|                              |        | (b) Provide in the abstract an informative and balanced summary of what was done and what was found                                                                                  | 2                  |
| <b>Introduction</b>          |        |                                                                                                                                                                                      |                    |
| Background/rationale         | 2      | Explain the scientific background and rationale for the investigation being reported                                                                                                 | 3                  |
| Objectives                   | 3      | State specific objectives, including any prespecified hypotheses                                                                                                                     | 4                  |
| <b>Methods</b>               |        |                                                                                                                                                                                      |                    |
| Study design                 | 4      | Present key elements of study design early in the paper                                                                                                                              | 5                  |
| Setting                      | 5      | Describe the setting, locations, and relevant dates, including periods of recruitment, exposure, follow-up, and data collection                                                      | 5                  |
| Participants                 | 6      | (a) Give the eligibility criteria, and the sources and methods of selection of participants                                                                                          | 5                  |
| Variables                    | 7      | Clearly define all outcomes, exposures, predictors, potential confounders, and effect modifiers. Give diagnostic criteria, if applicable                                             | 6                  |
| Data sources/<br>measurement | 8*     | For each variable of interest, give sources of data and details of methods of assessment (measurement). Describe comparability of assessment methods if there is more than one group | 6                  |
| Bias                         | 9      | Describe any efforts to address potential sources of bias                                                                                                                            | N/A                |
| Study size                   | 10     | Explain how the study size was arrived at                                                                                                                                            | 5                  |
| Quantitative variables       | 11     | Explain how quantitative variables were handled in the analyses. If applicable, describe which groupings were chosen and why                                                         | N/A                |
| Statistical methods          | 12     | (a) Describe all statistical methods, including those used to control for confounding                                                                                                | 8                  |
|                              |        | (b) Describe any methods used to examine subgroups and interactions                                                                                                                  | 8                  |
|                              |        | (c) Explain how missing data were addressed                                                                                                                                          | N/A                |
|                              |        | (d) If applicable, describe analytical methods taking account of sampling strategy                                                                                                   | N/A                |
|                              |        | (e) Describe any sensitivity analyses                                                                                                                                                |                    |
| <b>Results</b>               |        |                                                                                                                                                                                      |                    |



|                          |     |                                                                                                                                                                                                              |                       |
|--------------------------|-----|--------------------------------------------------------------------------------------------------------------------------------------------------------------------------------------------------------------|-----------------------|
| Participants             | 13* | (a) Report numbers of individuals at each stage of study—eg numbers potentially eligible, examined for eligibility, confirmed eligible, included in the study, completing follow-up, and analysed            | Figure 1              |
|                          |     | (b) Give reasons for non-participation at each stage                                                                                                                                                         | N/A                   |
|                          |     | (c) Consider use of a flow diagram                                                                                                                                                                           | Figure 1              |
| Descriptive data         | 14* | (a) Give characteristics of study participants (eg demographic, clinical, social) and information on exposures and potential confounders                                                                     | 9                     |
|                          |     | (b) Indicate number of participants with missing data for each variable of interest                                                                                                                          | N/A                   |
| Outcome data             | 15* | Report numbers of outcome events or summary measures                                                                                                                                                         | N/A                   |
| Main results             | 16  | (a) Give unadjusted estimates and, if applicable, confounder-adjusted estimates and their precision (eg, 95% confidence interval). Make clear which confounders were adjusted for and why they were included | 10-14                 |
|                          |     | (b) Report category boundaries when continuous variables were categorized                                                                                                                                    | Written on each table |
|                          |     | (c) If relevant, consider translating estimates of relative risk into absolute risk for a meaningful time period                                                                                             | N/A                   |
| Other analyses           | 17  | Report other analyses done—eg analyses of subgroups and interactions, and sensitivity analyses                                                                                                               | N/A                   |
| <b>Discussion</b>        |     |                                                                                                                                                                                                              |                       |
| Key results              | 18  | Summarise key results with reference to study objectives                                                                                                                                                     | 14                    |
| Limitations              | 19  | Discuss limitations of the study, taking into account sources of potential bias or imprecision. Discuss both direction and magnitude of any potential bias                                                   | 17                    |
| Interpretation           | 20  | Give a cautious overall interpretation of results considering objectives, limitations, multiplicity of analyses, results from similar studies, and other relevant evidence                                   | 14-17                 |
| Generalisability         | 21  | Discuss the generalisability (external validity) of the study results                                                                                                                                        | N/A                   |
| <b>Other information</b> |     |                                                                                                                                                                                                              |                       |
| Funding                  | 22  | Give the source of funding and the role of the funders for the present study and, if applicable, for the original study on which the present article is based                                                | 18                    |

\*Give information separately for cases and controls in case-control studies and, if applicable, for exposed and unexposed groups in cohort and cross-sectional studies.

**Note:** An Explanation and Elaboration article discusses each checklist item and gives methodological background and published examples of transparent reporting. The STROBE checklist is best used in conjunction with this article (freely available on the Web sites of PLoS Medicine at <http://www.plosmedicine.org/>, Annals of Internal Medicine at <http://www.annals.org/>, and Epidemiology at <http://www.epidem.com/>). Information on the STROBE Initiative is available at [www.strobe-statement.org](http://www.strobe-statement.org).

# BMJ Open

## Association of Serum Uric Acid, Morning Home Blood Pressure and Cardiovascular Risk Factors in a Population with Previous Prehypertension

|                                 |                                                                                                                                                                                                                                                                                                                                                                                                                                                                                                                                                                                                                                                                                        |
|---------------------------------|----------------------------------------------------------------------------------------------------------------------------------------------------------------------------------------------------------------------------------------------------------------------------------------------------------------------------------------------------------------------------------------------------------------------------------------------------------------------------------------------------------------------------------------------------------------------------------------------------------------------------------------------------------------------------------------|
| Journal:                        | <i>BMJ Open</i>                                                                                                                                                                                                                                                                                                                                                                                                                                                                                                                                                                                                                                                                        |
| Manuscript ID                   | bmjopen-2020-038046.R2                                                                                                                                                                                                                                                                                                                                                                                                                                                                                                                                                                                                                                                                 |
| Article Type:                   | Original research                                                                                                                                                                                                                                                                                                                                                                                                                                                                                                                                                                                                                                                                      |
| Date Submitted by the Author:   | 28-Jun-2020                                                                                                                                                                                                                                                                                                                                                                                                                                                                                                                                                                                                                                                                            |
| Complete List of Authors:       | Bawazier, Lucky ; Universitas Indonesia, Department of Internal Medicine, Faculty of Medicine<br>Sja'bani, Mochammad; Universitas Gadjah Mada, Mlati Study, Department of Internal Medicine, Faculty of Medicine, Public Health and Nursing<br>Irijanto, Fredie; DR. Soeradji Tirtonegoro Hospital<br>Zulaela, Zulaela; Universitas Gadjah Mada, Faculty of Mathematics and Natural Sciences<br>Widiatmoko, Agus; Universitas Muhammadiyah Yogyakarta, Department of Internal Medicine, Faculty of Medicine and Health Sciences<br>Kholiq, Abdul; Universitas Muhammadiyah Yogyakarta, Faculty of Medicine and Health Sciences<br>Tomino, Yasuhiko; Medical Corporation Group Showakai |
| <b>Primary Subject Heading</b>: | Public health                                                                                                                                                                                                                                                                                                                                                                                                                                                                                                                                                                                                                                                                          |
| Secondary Subject Heading:      | Epidemiology                                                                                                                                                                                                                                                                                                                                                                                                                                                                                                                                                                                                                                                                           |
| Keywords:                       | Hypertension < CARDIOLOGY, PUBLIC HEALTH, EPIDEMIOLOGY                                                                                                                                                                                                                                                                                                                                                                                                                                                                                                                                                                                                                                 |
|                                 |                                                                                                                                                                                                                                                                                                                                                                                                                                                                                                                                                                                                                                                                                        |

SCHOLARONE™  
Manuscripts



I, the Submitting Author has the right to grant and does grant on behalf of all authors of the Work (as defined in the below author licence), an exclusive licence and/or a non-exclusive licence for contributions from authors who are: i) UK Crown employees; ii) where BMJ has agreed a CC-BY licence shall apply, and/or iii) in accordance with the terms applicable for US Federal Government officers or employees acting as part of their official duties; on a worldwide, perpetual, irrevocable, royalty-free basis to BMJ Publishing Group Ltd ("BMJ") its licensees and where the relevant Journal is co-owned by BMJ to the co-owners of the Journal, to publish the Work in this journal and any other BMJ products and to exploit all rights, as set out in our [licence](#).

The Submitting Author accepts and understands that any supply made under these terms is made by BMJ to the Submitting Author unless you are acting as an employee on behalf of your employer or a postgraduate student of an affiliated institution which is paying any applicable article publishing charge ("APC") for Open Access articles. Where the Submitting Author wishes to make the Work available on an Open Access basis (and intends to pay the relevant APC), the terms of reuse of such Open Access shall be governed by a Creative Commons licence – details of these licences and which [Creative Commons](#) licence will apply to this Work are set out in our licence referred to above.

Other than as permitted in any relevant BMJ Author's Self Archiving Policies, I confirm this Work has not been accepted for publication elsewhere, is not being considered for publication elsewhere and does not duplicate material already published. I confirm all authors consent to publication of this Work and authorise the granting of this licence.

1  
2  
3 1 **ASSOCIATION OF SERUM URIC ACID, MORNING HOME BLOOD PRESSURE**  
4  
5 2 **AND CARDIOVASCULAR RISK FACTORS IN A POPULATION WITH PREVIOUS**  
6  
7 **PREHYPERTENSION**  
8  
9  
10 4

11  
12 5 **Lucky A Bawazier<sup>1,2</sup>, Mochammad Sja'bani<sup>1</sup>, Freddie Irijanto<sup>1,3</sup>, Zulaela<sup>1,4</sup>, Agus**  
13  
14 6 **Widiatmoko<sup>1,5</sup>, Abdul Kholiq<sup>1,6</sup>, Yasuhiko Tomino<sup>7</sup>**  
15  
16  
17 7

18  
19 8 <sup>1</sup> Mlati Study Group, Department of Internal Medicine, Faculty of Medicine, Public Health and Nursing,  
20  
21 9 Universitas Gadjah Mada, Yogyakarta, Indonesia

22  
23 10 <sup>2</sup> Department of Internal Medicine, Faculty of Medicine, Universitas Indonesia, Jakarta, Indonesia

24  
25 11 <sup>3</sup> Dr. Soeradji Tirtonegoro General Hospital, Klaten, Central Java, Indonesia

26  
27 12 <sup>4</sup> Department of Mathematics, Faculty of Mathematics and Natural Sciences, Universitas Gadjah Mada,  
28  
29 13 Yogyakarta, Indonesia

30  
31 14 <sup>5</sup> Department of Internal Medicine, Faculty of Medicine, Universitas Muhammadiyah Yogyakarta, Yogyakarta,  
32  
33 15 Indonesia

34  
35 16 <sup>6</sup> Faculty of Medicine, Universitas Muhammadiyah Yogyakarta, Yogyakarta, Indonesia

36  
37 17 <sup>7</sup> Medical Corporation SHOWAKAI, Tokyo, Japan  
38  
39 18

40  
41 19 **Correspondence:**

42  
43 20 Name : Mochammad Sja'bani

44  
45 21 Address : Perumahan Nandan Griya Idaman, Jalan Nandan Baru 19A Sleman,  
46  
47 22 Yogyakarta 55284, Indonesia

48  
49 23 Telephone : +62811282830

50  
51 24 Fax : +62274 625225

52  
53 25 Email : msbani\_jogja@yahoo.com  
54  
55  
56  
57 26

58  
59 27 **Word count: 3801**  
60

**ABSTRACT**

**Objective:** To observe the changes in blood pressure (BP) over 10 years and to investigate current BP association to serum uric acid (SUA) levels and cardiovascular risk factors in the epidemiological data of a target group of prehypertensive patients in 2007.

**Design:** cross-sectional study

**Setting:** Mlati Sub-district, Sleman District, Yogyakarta Province, Indonesia

**Participants:** A total of 733 patients from “Mlati Study Database” in 2007 were selected by simple random sampling using statistical software. Subjects had both physical and laboratory examinations.

**Outcome measures:** Morning home blood pressure and laboratory examination of urine (uric acid excretion and creatinine) and blood samples (SUA, blood urea nitrogen, creatinine, a lipid profile, and fasting blood glucose levels)

**Results:** About 31,1% of 733 prehypertensive subjects became hypertension after 10 years, 24,6% returned to normal tension, and the rest of it remained in prehypertensive state. Mean (SD) of SUA levels in 2017 were significantly higher in men than in women (5.78 (1.25) mg/dL vs 4.52 (1.10) mg/dL,  $p<0.001$ ). Furthermore, men tended to have high-normal (5–7 mg/dL) or high SUA levels ( $\geq 7$  mg/dL) compared to women ( $p<0.001$ , RR=2.60). High-normal and high SUA levels in population with a history of prehypertension were significantly associated with current prehypertension and hypertension only in women ( $p=0.001$ , RR=1.21). Age and body mass index was found to be significantly associated with both systolic and diastolic BP in men, but only with systolic BP in women. Fasting blood glucose and SUA levels were significantly associated with systolic and diastolic BP only in women.

1  
2  
3 52 **Conclusion:** We concluded that after 10 years, of 733 prehypertensive subjects, 31.1%  
4  
5  
6 53 became hypertensive. The SUA levels in men are significantly higher than those in women.  
7  
8 54 Moreover, High-normal and high SUA levels were significantly associated with  
9  
10 55 prehypertension and hypertension in women but not in men.  
11  
12

13 56

14  
15 57 **Keywords:** blood pressure, serum uric acid, cardiovascular risk factor, gender differences  
16  
17 58

18 59

### 19 59 **STRENGTH AND LIMITATION OF THIS STUDY**

- 20  
21 60
- 22 • This study followed up the changes in blood pressure on subjects for over 10 years.
  - 23
  - 24 61 • The association between serum uric acid, blood pressure, and cardiovascular risk factors  
25  
26 62 were analysed based on gender.  
27  
28
  - 29 63 • The analysis' was also performed by using both JNC 7 and 2017 ACC/AHA guideline.  
30  
31 64 • This study could not present the changes of all measured values over 10 year period  
32  
33 65 because, in the prior study in 2007, these laboratory values were not examined, except  
34  
35 66 for blood pressure.  
36  
37

38 67

## 68 INTRODUCTION

69 Hypertension is still a major problem worldwide, as reflected by a meta-analysis report  
70 in 2016 stating that in 2010, 40% of the world's population was hypertensive and that  
71 approximately 17 million people worldwide died due to hypertension.[1] In Indonesia, the  
72 prevalence of hypertension in 2013 was 25.8%, based on the Indonesian Ministry of Health  
73 report.[2] Therefore, it is important to facilitate the early diagnosis and treatment of  
74 hypertension and its possible effects. Patients with prehypertension were hypothesized to  
75 eventually become hypertensive after 10 years, and thus have a poorer quality of life [3,4].  
76 During the last two decades, it has been repeatedly published that the incidence of  
77 hypertension is associated with even moderate increases in levels of serum uric acid (SUA)  
78 and an increased risk of cardiovascular diseases (CVD).[5,6] The Framingham Heart Study  
79 reported an increased risk of blood pressure (BP) progression in 3157 subjects with  
80 hyperuricemia. SUA was positively associated with increases in both systolic blood pressure  
81 (SBP) and diastolic blood pressure (DBP) after 4 years with no antihypertensive treatment.[7]  
82 Current findings based on a large-scale cohort study suggested that uric acid is a predictive  
83 factor of the development of prehypertension in adults.[8] A meta-analysis by Jiang *et al.*  
84 indicated that SUA was possibly associated with prehypertension but still found conflicting  
85 results.[9] The associations among SUA, hypertension, cardiovascular risk factors and gender  
86 remain controversial. Serum uric acid levels have been known to have an association with  
87 blood pressure and hypertension.[10-12] Some studies reported that hyperuricemia has higher  
88 susceptibility of developing hypertension especially in men [10,13], while the other study  
89 reported vice versa.[14] Lee *et al.* also showed that hyperuricemia in women led to a higher  
90 risk of developing hypertension than in men.[15] In terms of the association of SUA and  
91 cardiovascular risk, SUA did not have a causal role in the development of cardiovascular  
92 outcomes.[16] Another study stated that the serum uric acid level was an independent

1  
2  
3 93 predictive factor for cardiovascular risk in individuals without hypertension and diabetes.[17]  
4  
5 94 Serum uric acid also being reported to have a stronger association with cardiovascular risk  
6  
7 [18] and risk of cardiovascular disease mortality [19,20] in women than in men.  
8  
9

10 96 Therefore, the aim of this study was to observe the progression from prehypertension  
11  
12 97 to hypertension after 10 years (2007-2017) and the association of BP with SUA as well as  
13  
14 98 other cardiovascular risk factors in 2017.  
15  
16

17 99

## 100 **METHODS**

### 101 *Study Design*

102 This study was a cross-sectional study conducted in Mlati Sub-district, Sleman  
103 District in the Yogyakarta Special Region, Indonesia. The protocol of this study was  
104 approved by the Medical and Health Research Ethics Committee of Faculty of Medicine,  
105 Public Health and Nursing, Universitas Gadjah Mada, Yogyakarta, Indonesia with the ID  
106 approval of KE/FK/0961/EC/2017.

### 107 *Study Population*

108 We pooled data from participants enrolled in the 2007 Mlati Study Database. The  
109 sample of the Mlati Study included 12,073 people aged 20–69 years who lived in 3 villages  
110 in Mlati (Tirtoadi, Sumberadi, and Tlogoadi), Sleman, Yogyakarta, Indonesia. The inclusion  
111 criteria for the prehypertensive subgroup of the study sample were SBP of 120–139 mmHg  
112 and/or DBP of 80–89 mmHg, no proteinuria, no glycosuria, and age between 20 and 49  
113 years; this subgroup included 4,190 participants (current age was 30–59 years). In 2017, of  
114 the 4,190 individuals with a history of prehypertension in 2007, 1500 subjects were selected  
115 as participants in the current study by simple random sampling using statistical software. All  
116 1500 subjects were invited to have a physical and laboratory examination; however, only 733  
117 subjects who participated in the sampling were examined (the other subjects who did not  
118  
119  
120



1  
2  
3 118 show up during the laboratory examination were due to the change of residential area or  
4  
5 119 death or any other unknown reasons and were excluded from this study). All subjects did not  
6  
7  
8 120 take any drugs lowering BP and SUA. All subjects were provided informed consent at the  
9  
10 121 beginning of the study (Figure 1).

### 12 122 ***Patient and Public Involvement***

14 123 Patients were not involved in any of the design, analysis, and presentation of the study  
15  
16  
17 124 results.

### 19 125 ***Definition of Prehypertension and Hypertension***

21 126 The definitions of prehypertension and hypertension were based on the Seventh  
22  
23  
24 127 Report of Joint National Committee (JNC 7) because the newer JNC 8 report renewed only  
25  
26 128 their treatment targets, not their classifications. The SBP of 120–139 mmHg and/or DBP of  
27  
28 129 80–89 mmHg are defined as prehypertension, while SBP of  $\geq 140$  mmHg and/or DBP of  $\geq 90$   
29  
30 130 mmHg are defined as hypertension.[21]

32  
33 131 For further analysis, we applied the 2017 ACC/AHA guideline, which classifies BP as  
34  
35 132 follows: (1) normal BP = SBP  $< 120$  mmHg and DBP  $< 80$  mmHg, (2) elevated BP = SBP  
36  
37 133 120–129 mmHg and DBP  $< 80$  mmHg, (3) stage 1 hypertension = SBP 130–139 mmHg or  
38  
39 134 DBP 80–89 mmHg, and (4) stage 2 hypertension = SBP  $\geq 140$  mmHg or DBP  $\geq 90$  mmHg.[22]

### 42 135 ***Serum Uric Acid Cut-off Point***

44 136 Based on the study by Sja'bani (2014), the cut-off point of SUA was divided into 3  
45  
46 137 categories: normal ( $< 5$  mg/dL), high-normal (5–7 mg/dL), and high ( $\geq 7$  mg/dL).[23]

### 49 138 ***Data Collection***

51 139 The data collection was conducted twice during the study period. The first data  
52  
53 140 collection was conducted in 2007 to collect the prehypertension population (n=4,190). The  
54  
55 141 second data collection was performed in 2017 to collect samples from the Mlati Study  
56  
57  
58 142 Database by the random sampling method (n=733).

1  
2  
3 143 In 2007, interviews were conducted on 12,073 subjects to obtain demographic data  
4  
5 144 (e.g. sex and age), family history of hypertension and diabetes mellitus, patients' history of  
6  
7 145 diabetes mellitus, patients' history of consuming hypertension and uric acid drugs, and to  
8  
9 146 perform physical and laboratory examinations. Physical examinations, which included  
10  
11 147 measurements of morning home BP (measured by using sphygmomanometer), body weight,  
12  
13 148 body height, upper-hand circumference, wrist circumference, abdominal circumference, and  
14  
15 149 hip circumference, were conducted on day 1 in subject's house or their neighbor. BP  
16  
17 150 measurements were performed in the morning (at 6 – 8 a.m) by the medical team for 2 times  
18  
19 151 (or until stable BP were obtained) while subjects in sitting position. On day 2, we examined  
20  
21 152 morning home BP and took urine and blood samples.  
22  
23  
24  
25

26 153 In 2017, we collected data from 733 subjects, including interviews of demographic  
27  
28 154 data, physical and laboratory examinations. On the first day, subjects were interviewed,  
29  
30 155 physically examined, and given urine containers for one-time urine samples, as well as for a  
31  
32 156 24-h urine collection that had to be submitted on day 2, in their home or neighbour. The  
33  
34 157 physical examination was performed by the medical team, consisting of a morning home BP  
35  
36 158 measurement in the morning (at 6 – 8 a.m) for 2 times (or until stable BP were obtained),  
37  
38 159 while subjects in sitting position, using the Omron HEM-907 digital automatic blood pressure  
39  
40 160 monitor (manufactured by Omron Healthcare Co., Ltd, Kyoto, Japan) and measurements of  
41  
42 161 body weight, body height, upper-hand circumference, wrist circumference, abdominal  
43  
44 162 circumference, and hip circumference. On the second day, subjects who were in fasting  
45  
46 163 condition were invited to come to the neighbour's hall in the morning and physically  
47  
48 164 examined for BP again (at 6 – 8 a.m) and drawn for their blood. Urine and blood samples  
49  
50 165 were examined in the laboratory (Prodia Laboratory, Yogyakarta, Indonesia). A 24-h urine  
51  
52 166 sample was collected to measure uric acid excretion and creatinine, and a blood sample was  
53  
54 167 collected to measure SUA, blood urea nitrogen, creatinine, a lipid profile (total cholesterol,  
55  
56  
57  
58  
59  
60

1  
2  
3 168 low-density lipoprotein/LDL-C, high-density lipoprotein/HDL-C and triglycerides), and  
4  
5 169 fasting blood glucose levels.  
6  
7

### 8 170 *Statistical Analysis*

9

10 171 The outcomes of this study were presented in two primary analyses which were (1)  
11  
12 172 blood pressure changes during the period of 2007-2017 to measure the progression from  
13  
14 173 prehypertension (2007) to hypertension (2017) (Table 2), and (2) the association of current  
15  
16 174 BP with SUA levels and cardiovascular risk factors (Table 4 and Table 5). Additional  
17  
18 175 analyses were also being performed to observed the SUA association with cardiovascular risk  
19  
20 176 factors (Figure 2 and Figure 3). The data analyses were mostly performed based on gender in  
21  
22 177 order to know about the gender differences in the analyses mentioned above.  
23  
24  
25

26 178 Data presented later in the results section were collected in 2007 and 2017. Data were  
27  
28 179 analysed using IBM SPSS Statistics for Windows, Version 22.0.[24] The data consisted of  
29  
30 180 continuous and categorical data, which were expressed as the mean (SD) for continuous data  
31  
32 181 and as numbers and percentages for categorical data. The continuous variables were analysed  
33  
34 182 and compared by independent samples t-tests and nonparametric Mann-Whitney U tests. The  
35  
36 183 categorical variables were analysed and compared by Pearson chi-square tests. Multivariable  
37  
38 184 analysis was performed using multiple linear regressions to describe the association between  
39  
40 185 SUA levels and BP, with adjustment for age and cardiovascular risk factors. The significance  
41  
42 186 of associations between categorical variables and numerical variables was determined using  
43  
44 187 95% confidence intervals (CIs).  
45  
46  
47  
48

49 188  
50  
51  
52  
53  
54  
55  
56  
57  
58  
59  
60

## 189 RESULTS

**Table 1.** Characteristics of Subjects by Gender in 2017 in Mean (SD)

| Variables                     | Men<br>n=306 | Women<br>n=427 | p-value |
|-------------------------------|--------------|----------------|---------|
| Age (years)                   | 46 (7.71)    | 46 (7.76)      | 0.431   |
| 30 – 39 years                 | 35 (2.86)    | 36(2.63)       | 0.093   |
| 40 – 49 years                 | 45 (2.89)    | 45 (2.67)      | 0.372   |
| 50 – 59 years                 | 54 (3.18)    | 54 (2.77)      | 0.779   |
| BMI (kg/m <sup>2</sup> )      | 23.5 (3.70)  | 25.7 (4.81)    | <0.001* |
| SBP (mmHg)                    | 132 (17.26)  | 134 (21.62)    | 0.595   |
| DBP (mmHg)                    | 78 (11.96)   | 79 (12.32)     | 0.091   |
| Uric Acid (mg/dL)             | 5.8 (1.25)   | 4.5 (1.10)     | <0.001* |
| Total cholesterol (mg/dL)     | 167 (36.86)  | 166 (41.59)    | 0.559   |
| LDL (mg/dL)                   | 109 (29.59)  | 106 (33.27)    | 0.155   |
| HDL (mg/dL)                   | 41 (10.02)   | 47 (12.20)     | <0.001* |
| Triglyceride (mg/dL)          | 129 (79.09)  | 103 (63.84)    | <0.001* |
| Fasting Blood Glucose (mg/dL) | 100 (37.22)  | 97 (33.70)     | 0.101   |

\*Significant (p&lt;0.05)

The subjects of this study consisted of 733 adults (aged 30–59 years) living in the Mlati Subdistrict; 306 (41.75%) and 427 (58.25%) were men and women, respectively. The characteristics of the subjects (by gender) are presented in Table 1. There was no significant difference in age, SBP, DBP, total cholesterol, LDL, and fasting blood glucose between men and women (p>0.05). Significant differences were found in body mass index (BMI) (p<0.001), SUA levels (p<0.001), HDL (p<0.001) and triglycerides (p<0.001). BMI and HDL were significantly higher in women, whereas SUA levels and triglycerides were significantly higher in men.

**Table 2.** Blood Pressure changes after 10 years and Serum Uric Acid Frequency Distribution (n=733)

| Variables                | Frequency (%) |            |
|--------------------------|---------------|------------|
|                          | 2007          | 2017       |
| BP <sup>a</sup>          |               |            |
| Normal                   | 0             | 180 (24.6) |
| Prehypertension (Pre-HT) | 733 (100)     | 325 (44.3) |
| Hypertension (HT)        | 0             | 228 (31.1) |
| SUA <sup>b</sup>         |               |            |
| Normal                   | -             | 369 (50.3) |
| High-normal              | -             | 316 (43.1) |

High - 48 (6.6)

<sup>a</sup> BP (blood pressure), normal: SBP < 120 mmHg and DBP < 80 mmHg, prehypertension: SBP of 120–139 mmHg and/or DBP of 80–89 mmHg, hypertension: SBP of ≥140 mmHg and/or DBP of ≥90 mmHg)

<sup>b</sup> SUA (serum uric acid), normal <5 mg/dL, high-normal = 5–7 mg/dL, and high ≥7 mg/dL

198

199 After 10 years, among the 733 prehypertensive subjects, 180 (24.6%) returned to  
200 normal blood pressure, 325 (44.3%) remained in a prehypertensive state, and 228 (31.1%)  
201 became hypertensive. For SUA levels, 50.3% had normal SUA, 43.1% were high-normal,  
202 and only 6.6% had high SUA levels (Table 2).

**Table 3.** Association between Gender, Age, BMI, Uric Acid Excretion, and Uric Acid Concentration to Serum Uric Acid Level

| Variables                               | SUA <sup>a</sup>         |            | P value | RR   | 95% CI      |
|-----------------------------------------|--------------------------|------------|---------|------|-------------|
|                                         | High-normal and high (%) | Normal (%) |         |      |             |
| Gender                                  |                          |            |         |      |             |
| Men                                     | 237 (32.3)               | 69 (9.4)   | <0.001  | 2.60 | 2.22-3.05   |
| Women                                   | 127 (17.3)               | 300 (40.9) |         |      |             |
| Age                                     |                          |            |         |      |             |
| Men                                     |                          |            |         |      |             |
| 30 – 39 years*                          | 52 (17.0)                | 11 (3.6)   | -       | 1    | -           |
| 40 – 49 years                           | 104 (34.0)               | 22 (7.2)   | 1,000   | 1.00 | 0.87-1.15   |
| 50 – 59 years                           | 81 (26.5)                | 36 (11.8)  | 0.053   | 0.84 | 0.71-0.99   |
| Women                                   |                          |            |         |      |             |
| 30 – 39 years*                          | 22 (5.2)                 | 85 (19.9)  | -       | 1    | -           |
| 40 – 49 years                           | 40 (9.4)                 | 128 (30.0) | 0.530   | 1.16 | 0.73-1.84   |
| 50 – 59 years                           | 65 (15.2)                | 87 (20.4)  | <0.001  | 2.08 | 1.37-3.15   |
| BMI <sup>b</sup>                        |                          |            |         |      |             |
| Overweight-Obese                        | 171 (23.3)               | 154 (21.0) | 0.153   | 1.13 | 0.96 - 1.32 |
| Underweight-normal                      | 193 (26.3)               | 215 (29.3) |         |      |             |
| Uric Acid Excretion (24-h) <sup>c</sup> |                          |            |         |      |             |
| High                                    | 169 (23.1)               | 130 (17.7) | 0.002   | 1.32 | 1.10 - 1.57 |
| Normal                                  | 195 (26.6)               | 239 (32.6) |         |      |             |
| Uric Acid Concentration <sup>d</sup>    |                          |            |         |      |             |
| Normal                                  | 200 (27.3)               | 202 (27.5) | 0.956   | 1.00 | 0.87 – 1.16 |
| High                                    | 164 (22.4)               | 167 (22.8) |         |      |             |

\* reference category

<sup>a</sup> SUA, normal <5 mg/dL, high-normal = 5–7 mg/dL, and high ≥7 mg/dL

<sup>b</sup> BMI= body mass index, <18.5kg/m<sup>2</sup> = underweight, 18.5-24.9 kg/m<sup>2</sup> = normal, 25-29.9 kg/m<sup>2</sup> = overweight, >30 kg/m<sup>2</sup> = obese

<sup>c</sup> Uric acid excretion, <435.08 mg/day = normal, ≥435.08 mg/day = high

<sup>d</sup> Uric acid concentration (mg per 100 ml of urine), <46.63 mg% = normal, ≥46.63 mg% = high

203

1  
2  
3 204 In men, 32.3% of the subjects had high-normal or high levels of SUA, while in  
4  
5  
6 205 women, only 17.3% had high-normal or high levels of SUA. There was a significant  
7  
8 206 difference in SUA between men and women ( $p < 0.001$ ,  $RR = 2.60$ ,  $95\% \text{ CI} = 2.22\text{--}3.05$ ). When  
9  
10 207 gender was further analysed by age distribution, age was significantly associated with SUA  
11  
12 208 levels only in women aged 50–59 years ( $p < 0.001$ ,  $RR = 2.08$ ,  $95\% \text{ CI} = 1.36\text{--}3.15$ ).  
13  
14 209 Additionally, there was a significant association between SUA levels and uric acid excretion  
15  
16 210 by 24-h urine ( $p = 0.002$ ,  $RR = 1.32$ ,  $95\% \text{ CI} = 1.10\text{--}1.57$ ). On the other hand, no significant  
17  
18 211 association was observed between SUA levels and BMI ( $p = 0.153$ ,  $RR = 1.1$ ,  $95\% \text{ CI} = 0.96\text{--}$   
19  
20 212  $1.32$ ) or between SUA levels and uric acid concentration ( $p = 0.100$ ,  $RR = 0.786$ ,  $95\%$   
21  
22 213  $\text{CI} = 0.59\text{--}1.05$ ) (Table 3).

26 214 The associations between gender and SUA levels on BP are shown in Table 4. There  
27  
28 215 was no significant association between gender and BP ( $p = 0.584$ ). To examine the association  
29  
30 216 between uric acid and hypertension, we compared SUA levels and morning home BP. The  
31  
32 217 association between SUA levels and BP was statistically significant ( $p = 0.008$ ,  $RR = 1.12$ ,  $95\%$   
33  
34 218  $\text{CI} = 1.03\text{--}1.22$ ). In subjects with previous history of prehypertension, high-normal SUA or  
35  
36 219 high SUA levels were associated with current prehypertension or hypertension. Furthermore,  
37  
38 220 the association between SUA levels and BP in men and women is also described in Table 4.  
39  
40 221 In men, SUA levels were not significantly associated with BP ( $p = 0.805$ ,  $RR = 1.02$ ,  $95\%$   
41  
42 222  $\text{CI} = 0.88\text{--}1.19$ ). However, there was a significant association between SUA levels and BP in  
43  
44 223 women ( $p = 0.001$ ,  $RR = 1.21$ ,  $95\% \text{ CI} = 1.09\text{--}1.34$ ). In women, the risk of having  
45  
46 224 prehypertension or hypertension was 1.21 times higher in those who had high-normal or high  
47  
48 225 SUA levels than those with normal SUA levels. Additional analysis using the 2017  
49  
50 226 ACC/AHA guideline for observing the associations between gender and SUA levels on BP  
51  
52 227 also showed similar results with the previous analysis using JNC 7 guideline regarding the  
53  
54 228 significant associations between SUA levels and BP.  
55  
56  
57  
58  
59  
60

**Table 4.** Association between Gender and Serum Uric Acid on Blood Pressure

| Variables            | Blood Pressure     |            |        |                    |                           |                         |        |                    |
|----------------------|--------------------|------------|--------|--------------------|---------------------------|-------------------------|--------|--------------------|
|                      | JNC 7 <sup>a</sup> |            |        |                    | 2017 ACC/AHA <sup>b</sup> |                         |        |                    |
|                      | Pre-HT and HT (%)  | Normal (%) | p      | RR (95%CI)         | HT-1 and HT-2 (%)         | Normal and elevated (%) | p      | RR (95%CI)         |
| Gender               |                    |            |        |                    |                           |                         |        |                    |
| Men                  | 234 (31.9)         | 72 (9.8)   | 0.584  | 1.02 (0.94 – 1.11) | 159 (21.7)                | 147 (20.1)              | 0.129  | 0.9 (0.79 - 1.03)  |
| Women                | 319 (43.5)         | 108 (14.7) |        |                    | 246 (33.6)                | 181 (24.7)              |        |                    |
| SUA <sup>c</sup>     |                    |            |        |                    |                           |                         |        |                    |
| High-normal and High | 290 (39.6)         | 74 (10.1)  | 0.008* | 1.12 (1.03 - 1.22) | 224 (30.6)                | 140 (19.1)              | 0.001* | 1.26 (1.10 - 1.43) |
| Normal               | 263 (35.9)         | 106 (14.5) |        |                    | 181 (24.7)                | 188 (25.6)              |        |                    |
| SUA                  |                    |            |        |                    |                           |                         |        |                    |
| Men                  |                    |            |        |                    |                           |                         |        |                    |
| High-normal and High | 182 (59.5)         | 55 (18.0)  | 0.805  | 1.02 (0.88 – 1.19) | 129 (42.2)                | 108 (35.3)              | 0.109  | 1.25 (0.93 – 1.68) |
| Normal               | 52 (17.0)          | 17 (5.6)   |        |                    | 30 (9.8)                  | 39 (12.7)               |        |                    |
| Women                |                    |            |        |                    |                           |                         |        |                    |
| High-normal and High | 108 (25.3)         | 19 (4.4)   | 0.001* | 1.21 (1.09 – 1.34) | 95 (22.2)                 | 32 (7.5)                | 0.000* | 1.49 (1.28 – 1.73) |
| Normal               | 211 (49.4)         | 89(20.8)   |        |                    | 151 (35.4)                | 149 (34.9)              |        |                    |

<sup>a</sup> BP was categorized using the JNC 7 Guideline (prehypertension: SBP of 120–139 mmHg and/or DBP of 80–89 mmHg, hypertension: SBP of ≥140 mmHg and/or DBP of ≥90 mmHg)

<sup>b</sup> BP was categorized using the 2017 ACC/AHA Guideline (normal BP = SBP <120 mmHg and DBP <80 mmHg, elevated BP = SBP 120-129 mmHg and DBP <80 mmHg, stage 1 hypertension = SBP 130-139 mmHg or DBP 80-89 mmHg, stage 2 hypertension = SBP ≥140 mmHg or DBP ≥90 mmHg)

<sup>c</sup> SUA, normal <5 mg/dL, high-normal = 5–7 mg/dL, and high ≥7 mg/dL



Figure 2 shows the association between SUA and cardiovascular risk factors. The SUA levels were significantly associated with total cholesterol ( $p=0.001$ ), LDL ( $p=0.002$ ), HDL ( $p<0.001$ ), triglycerides ( $p<0.001$ ) and fasting blood glucose ( $p=0.030$ ). Subjects with high-normal and high SUA levels had significantly higher total cholesterol, LDL, and triglyceride levels than subjects with normal SUA levels. On the other hand, HDL and fasting blood glucose were statistically lower among subjects with high-normal and high SUA levels than among those with normal SUA levels.

The relationships between SUA levels and cardiovascular risk factors among men and women are presented in Figure 3. In men, there were significant differences in BMI ( $p<0.001$ ) and triglycerides ( $p=0.002$ ) between subjects with normal SUA levels and those with high-normal and high SUA levels. In women, there was no significant differences in all cardiovascular risk factors ( $p>0.05$ ) between subjects with normal SUA levels and those with high-normal and high SUA levels.

**Table 5.** Multiple Linear Regression of Association of Age, Cardiovascular Risk Factors and SUA on Blood Pressure

| Variables             | Blood Pressure of Men |         |               |         | Blood Pressure of Women |         |               |         |
|-----------------------|-----------------------|---------|---------------|---------|-------------------------|---------|---------------|---------|
|                       | Systolic              |         | Diastolic     |         | Systolic                |         | Diastolic     |         |
|                       | Coef. $\beta$         | p-value | Coef. $\beta$ | p-value | Coef. $\beta$           | p-value | Coef. $\beta$ | p-value |
| Age                   | 0.704                 | <0.001* | 0.336         | <0.001* | 0.674                   | <0.001* | -0.017        | 0.817   |
| SUA                   | -0.247                | 0.745   | 0.582         | 0.267   | 4.527                   | <0.001* | 2.223         | <0.001* |
| BMI                   | 1.602                 | <0.001* | 1.295         | <0.001* | 0.929                   | <0.001* | 0.722         | <0.001* |
| Total Cholesterol     | 0.044                 | 0.696   | 0.042         | 0.591   | 0.119                   | 0.279   | 0.030         | 0.643   |
| LDL                   | -0.074                | 0.529   | -0.036        | 0.657   | -0.102                  | 0.365   | -0.014        | 0.828   |
| HDL                   | 0.184                 | 0.174   | 0.042         | 0.653   | -0.054                  | 0.656   | -0.049        | 0.483   |
| Triglycerides         | -0.005                | 0.828   | -0.001        | 0.941   | -0.029                  | 0.280   | 0.006         | 0.721   |
| Fasting Blood Glucose | 0.032                 | 0.213   | -0.001        | 0.941   | 0.098                   | 0.001*  | 0.040         | 0.020*  |

\*Significant ( $p<0.05$ )

SUA=Serum uric acid, BMI=Body mass index, LDL=Low density lipoprotein, HDL=High density lipoprotein

Multivariable analysis was conducted to describe the association between SUA levels and BP, with adjustment for age and cardiovascular risk factors. Cardiovascular risk factors



1  
2  
3 246 such as BMI, total cholesterol, LDL, HDL, triglycerides, and fasting blood glucose were all  
4  
5 247 taken into account for adjustment in multiple linear regression (Table 5). Age, BMI, fasting  
6  
7 248 blood glucose, and SUA levels were significantly associated with BP. Significant  
8  
9 249 associations were found between age and SBP both in men ( $p<0.001$ ) and women ( $p<0.001$ ),  
10  
11 250 and DBP only in men ( $p<0.001$ ). BMI was significantly associated with SBP and DBP both  
12  
13 251 in men ( $p<0.001$  and  $p<0.001$ ) and women ( $p<0.001$  and  $p<0.001$ ). In addition, fasting blood  
14  
15 252 glucose was found to be associated with SBP and DBP in women ( $p=0.001$  and  $p=0.020$ ).  
16  
17 253 Regarding SUA levels, SUA was significantly associated with both SBP and DBP in women  
18  
19 254 ( $p<0.001$  and  $p<0.001$ , respectively) but such association was not found in men.  
20  
21  
22  
23  
24  
25  
26

## 27 256 **DISCUSSION**

28  
29  
30 257 This study consisted of two parts of data collection. The first data collection was  
31  
32 258 performed in 2007 to gather data on the prehypertension population ( $n=4,190$ ); this study was  
33  
34 259 later called the “Mlati Study Database”. In 2017, after 10 years, the second data collection  
35  
36 260 was performed to gather samples from the Mlati Study Database by a random sampling  
37  
38 261 method ( $n=733$ ) to show the change in BP status from prehypertension to hypertension. The  
39  
40 262 data collection in 2017 also aimed to show the association between uric acid (serum, urinary  
41  
42 263 excretion, and concentrate) and hypertension.  
43  
44  
45

46 264 The results of our study showed that gender and uric acid excretion (by 24-h urine)  
47  
48 265 were significantly associated with SUA levels. The mean SUA levels in men were  
49  
50 266 significantly higher than those in women. In addition, subjects with high-normal and high  
51  
52 267 SUA levels had a risk of having prehypertension and hypertension that was 1.12 times higher  
53  
54 268 than those with normal SUA levels. When analysed by gender, high-normal and high SUA  
55  
56 269 levels were significantly associated with prehypertension and hypertension only in women.  
57  
58  
59 270 The relationship between SUA levels and the development of hypertension or renal disease  
60

1  
2  
3 271 had been shown in several previous studies. This relationship was significantly higher in  
4  
5 272 women than in men.[15,25]  
6

7  
8 273 The study by Kawabe *et al.* revealed that in women, the older the age was, the higher  
9  
10 274 the quartile of SUA, but in men, the quartile of SUA did not increase with age. However, an  
11  
12 275 increase in the quartile of SUA along with higher BMI was only found in men but not in  
13  
14 276 women. Additionally, the mean value of SUA in men was higher than in women.[26] These  
15  
16 277 results were consistent with our finding that SUA levels were significantly higher in men and  
17  
18 278 that SUA levels were significantly associated with higher BMI in men. However, the study  
19  
20 279 populations in this study and the study by Kawabe *et al.* were different in terms of the age  
21  
22 280 group examined, which were adults (30–59 years old) and elderly adults, respectively.[26] A  
23  
24 281 similar finding was also found by Zhang, *et al.* which reported that SUA levels were  
25  
26 282 statistically higher in men than in women, though the SUA level did not increase with the age  
27  
28 283 both in men and women.[27] These studies' results were consistent with our finding which  
29  
30 284 stated that SUA level was significantly higher in men and SUA level was significantly  
31  
32 285 associated with higher BMI also in men. However, the study population in this study and the  
33  
34 286 study by Kawabe, *et al.* was different in the age group which was adults (30-59 years) and  
35  
36 287 elderly, respectively.  
37  
38  
39  
40  
41

42 288 Chen *et al.* reported a different result in a cross-sectional analysis regarding the  
43  
44 289 association between SUA levels and the presence of hypertension when analysed by gender.  
45  
46 290 For the total population, SUA levels had significant associations with hypertension. The  
47  
48 291 levels of SUA had a significant relationship with hypertension in men aged <30 years, 30–40  
49  
50 292 years, and >40 years but only in women aged >40 years.[10] This situation could be  
51  
52 293 explained in Table 3, which provides the age distribution of women and its association with  
53  
54 294 SUA levels. In Table 3, the proportion of women aged 40–49 years combined with those  
55  
56 295 aged 50–59 years having high-normal and high SUA levels was 24.6%. This age range in  
57  
58  
59  
60

1  
2  
3 296 women is associated with menopausal problems. A study by Hak *et al.* stated that menopause  
4  
5 297 was associated with an increased risk of incident gout, which may help explain why the age  
6  
7 298 of the women in this study could play a significant role in their SUA levels.[28]  
8  
9

10 299       Regarding the cardiovascular risk factors, the result of this study found that the SUA  
11  
12 300 levels were significantly associated with total cholesterol ( $p=0.001$ ), LDL ( $p=0.002$ ), HDL  
13  
14 301 ( $p<0.001$ ), triglycerides ( $p<0.001$ ) and fasting blood glucose ( $p=0.030$ ), regardless of gender.  
15  
16 302 When the data were analysed by gender, significant differences were found only in BMI and  
17  
18 303 triglycerides and only in men ( $p<0.001$  and  $p=0.002$ , respectively). Another study has shown  
19  
20 304 a stronger association between the increase of SUA level and cardiovascular mortality among  
21  
22 305 women in healthy subjects compared to men.[29] Meta-analysis showed that there was a  
23  
24 306 significant association between hyperuricemia and cardiovascular mortality in women, but  
25  
26 307 not in men.[30] Chen *et al.* reported that SUA levels were significantly associated with the  
27  
28 308 occurrence of metabolic syndrome and hypertension in the total population. In men, SUA  
29  
30 309 levels had a positive association with the occurrence of metabolic syndrome in the age groups  
31  
32 310 of  $<30$  and  $30-40$ . In women, SUA levels were significantly associated with the occurrence  
33  
34 311 of metabolic syndrome in the age groups of  $<30$  and  $>40$ .[10]  
35  
36  
37  
38  
39

40 312       In this study, BMI was significantly associated with SBP and DBP in both genders.  
41  
42 313 This finding was in line with those of a previous study by Droyvold *et al.*, in which the  
43  
44 314 authors reported that an increase in BMI was associated with increased BP in men and  
45  
46 315 women.[31] With regard to the association between BMI and SUA levels, our findings were  
47  
48 316 different from those of a report by Rodrigues *et al.*, in which the authors reported a  
49  
50 317 significant correlation between BMI and SUA levels in both men and women.[32] The link  
51  
52 318 between BMI and hyperuricemia has not been well elucidated; however, insulin resistance  
53  
54 319 might be the bridging gap. Obese people are more likely to have metabolic syndrome, and the  
55  
56 320 metabolic syndrome itself is associated with insulin resistance. It is thought that insulin  
57  
58  
59  
60

1  
2  
3 321 resistance impairs the ability of the kidney to excrete uric acid and therefore leads to  
4  
5 322 hyperuricemia.[33]  
6

7  
8 323 This study found that fasting blood glucose was associated with SBP and DBP only in  
9  
10 324 women. The same result was observed in a study by Yan *et al.*, which revealed that fasting  
11  
12 325 plasma glucose was independent of both SBP and DBP.[34] Fasting blood glucose was also  
13  
14 326 associated with SUA levels, but when analysed by gender, no significant difference was  
15  
16 327 found. This finding is contradictory to those of a study by Kawamoto *et al.*, which revealed  
17  
18 328 that SUA levels were associated with fasting plasma glucose in females.[35] The mechanism  
19  
20 329 of how this phenomenon occurred remains unclear, and further study is needed to observe a  
21  
22 330 cause-effect relationship. Serum triglycerides were also associated with SUA levels in this  
23  
24 331 study. The relationship between SUA levels and lipid profiles has been described in various  
25  
26 332 studies, but the exact mechanism remains unclear. A study by Peng *et al.* revealed that all  
27  
28 333 lipid profile parameters, including triglycerides but not HDL cholesterol, were associated  
29  
30 334 with SUA levels.[36] SUA levels were associated with both SBP and DBP but only in  
31  
32 335 women. This result is similar to those of previous studies.[35, 37] It has been suggested that  
33  
34 336 the mechanism by which uric acid causes hypertension is due to endothelial dysfunction after  
35  
36 337 oxidative stress damage to the endothelium during excessive uric acid formation.[37]  
37  
38  
39  
40  
41

42 338 There were several limitations to this study. First, subjects in this study were collected  
43  
44 339 from the database made in 2007. From 1500 subjects randomly selected at the beginning of  
45  
46 340 this study, only 733 subjects joined and attend the 2-days examination. More than half of the  
47  
48 341 selected subjects did not attend the examination invitation due to several reasons, thus, this  
49  
50 342 had lessened the total samples of subjects of this study. However, a total sample of 733 has  
51  
52 343 met the minimum sample requirement for this study based on sample size calculation (a  
53  
54 344 minimum sample size of 661 subjects are needed for this study). We invited 1500 subjects at  
55  
56 345 the beginning of this study to anticipate any subjects that could not participate in this study  
57  
58  
59  
60

1  
2  
3 346 due to any reasons, so that the minimum number of samples could still be met. This was one  
4  
5 347 of the difficulties we met since this study was a community-based study. The findings of this  
6  
7 348 study were expected to be generalized to the 4190 prehypertensive patients whom collected  
8  
9 349 from “Mlati Study” database in 2007. Second, this study could not present the changes of all  
10  
11 350 measured values over a 10-year period because, in the prior study in 2007, these laboratory  
12  
13 351 values were not examined, except for blood pressure. Therefore, only the changes in blood  
14  
15 352 pressure can be presented on the results. Third, the instruments used to measure blood  
16  
17 353 pressure in 2007 and 2017 were different that might cause instrument bias. In 2007, we used  
18  
19 354 sphygmomanometers, whereas in 2017 we used digital automatic blood pressure monitors.  
20  
21 355 Thus, this may lead to bias in blood pressure data measurement between 2007 and 2017.  
22  
23 356 Nevertheless, we tried to minimize the bias by calibrating both the sphygmomanometers and  
24  
25 357 digital automatic blood pressure monitors before data collection, so that, the blood pressure  
26  
27 358 data were all accurate.  
28  
29  
30  
31  
32

33 359

## 34 35 360 **CONCLUSION**

36  
37 361 In conclusion, after 10 years of follow-up (2007-2017), of 733 prehypertensive  
38  
39 362 subjects, 180 (24.6%) returned to normal blood pressure, 325 (44.3%) remained in a  
40  
41 363 prehypertensive state, and 228 (31.1%) got hypertension. In the cross-sectional analyses of  
42  
43 364 SUA in 2017, the SUA levels in men were significantly higher than those in women.  
44  
45 365 Moreover, high-normal and high SUA levels were significantly associated with  
46  
47 366 prehypertension and hypertension in women but not in men.  
48  
49  
50

51 367

## 52 53 368 **ACKNOWLEDGMENTS**

54  
55 369 We would like to thank the Mlati Study Group, which assisted in this research. We would  
56  
57 370 also like to thank Prodia Laboratory for performing laboratory examinations.  
58  
59  
60

1  
2  
3 371 **CONTRIBUTORS**  
4

5 372 LAB, MS and YT composed the idea of the study and arranged the study's design. MS, FI,  
6  
7 373 AW, and AK obtained the data. ZZ led the statistical analysis with the supervision of MS.  
8  
9 374 MS, LAB and ZZ wrote the first draft of this paper and all authors read, revised, and  
10  
11 375 approved the final manuscript.  
12  
13

14 376 **FUNDING**

15  
16 377 This research was supported by the Mlati Study Group, Faculty of Medicine, University of  
17  
18 378 Gadjah Mada, Indonesia.  
19  
20

21 379 **COMPETING INTEREST**

22  
23 380 There were no conflicts of interest to disclose.  
24  
25

26 381 **DATA SHARING STATEMENT**

27  
28 382 Data may be obtained from the corresponding author upon reasonable request.  
29  
30  
31 383

32  
33 384 **REFERENCES**  
34  
35

- 36 385 1. Mills KT, Bundy JD, Kelly TN, *et al.* Global disparities of hypertension prevalence  
37  
38 386 and control: A systematic analysis of population-based studies from 90 countries.  
39  
40 387 *Circulation*. 2016; 134:441-50.  
41  
42 388 2. Annual Health Research Report. Division of Research and Health Development:  
43  
44 389 Indonesian Ministry of Health. 2013.  
45  
46 390 3. Ruchira P, Gajendra Singh M. PS 15-11 Impact of Hypertension on Quality of Life  
47  
48 391 among People Living in an Urban Area of Delhi, India. *J Hypertens* 2016; 34:e462.  
49  
50 392 doi: 10.1097/01.hjh.0000501221.33083.08  
51  
52 393 4. de Carvalho MV, Siqueira LB, Sousa ALL, *et al.* The Influence of Hypertension on  
53  
54 394 Quality of Life. *Arq Bras Cardiol* 2013; 100(2):164-174. doi: 10.5935/abc.20130030  
55  
56  
57  
58  
59  
60

- 1  
2  
3 395 5. Cicero AFG, Rosticci M, Fogacci F, *et al.* High Serum Uric Acid is Associated to  
4  
5 396 Poorly Controlled Blood Pressure and Higher Arterial Stiffness in Hypertensive  
6  
7 397 Subjects. *Eur J Int Med* 2017; 37:38–42.
- 8  
9  
10 398 6. Jin M, Yang F, Yang I, *et al.* Uric Acid, Hyperuricemia and Vascular Diseases. *Front*  
11  
12 399 *Biosci* 2012; 17:656–69.
- 13  
14 400 7. Grayson PC, Kim SY, LaValley M, *et al.* Hyperuricemia and Incident Hypertension:  
15  
16 401 A Systematic Review and Meta-analysis. *Arthritis Care Res* 2011; 63:102–10.
- 17  
18 402 8. Sundström J, Sullivan L, D’Agostino RB, *et al.* Relations of Serum Uric Acid to  
19  
20 403 Longitudinal Blood Pressure Tracking and Hypertension Incidence. *Hypertens* 2005;  
21  
22 404 45:28-33
- 23  
24 405 9. Jiang M, Gong D, Fan Y. Serum uric acid levels and risk of prehypertension: a meta-  
25  
26 406 analysis. *Clin Chem Lab Med.* 2016; DOI:10.1515.
- 27  
28 407 10. Chen YY, Kao TW, Yang HF, *et al.* The Association of Uric Acid with The Risk of  
29  
30 408 Metabolic Syndrome, Arterial Hypertension or Diabetes in Young Subjects - An  
31  
32 409 Observational Study. *Clin Chim Acta* 2018; 48:68-73.
- 33  
34 410 11. Ali N, Mahmood S, Islam F, *et al.* Relationship between Serum Uric Acid and  
35  
36 411 Hypertension: A Cross-sectional Study in Bangladeshi Adults. *Sci Rep* 2019; 9:9061.  
37  
38 412 <https://doi.org/10.1038/s41598-019-45680-4>
- 39  
40 413 12. Chen Q, Yin YJ, Chen WY, *et al.* Assessment of The Association between Serum  
41  
42 414 Uric Acid Levels and The Incidence of Hypertension in Nonmetabolic Syndrome  
43  
44 415 Subjects: A prospective Observational Study. *Medicine* 2018; 97:6.
- 45  
46 416 13. Lin X, Wang X, Li X, *et al.* Gender- and Age-Specific Differences in The  
47  
48 417 Association of Hyperuricemia and Hypertension: A Cross-Sectional Study. *Int J*  
49  
50 418 *Endocrinol* 2019; <https://doi.org/10.1155/2019/7545137>
- 51  
52  
53  
54  
55  
56  
57  
58  
59  
60



- 1  
2  
3 419 14. Nishio S, Maruyama Y, Sugano N, *et al.* Gender Interaction of Uric Acid in the  
4  
5 420 Development of Hypertension. *Clin Exp Hypertens* 2018; 40(5):446-451,  
6  
7 421 <https://doi.org/10.1080/10641963.2017.1392556>  
8  
9  
10 422 15. Lee JJ, Ahn JH, Hwang JS, *et al.* Relationship between uric Acid and Blood Pressure  
11  
12 423 in Different Age Groups. *Clin Hypertens* 2015; 21:14, DOI 10.1186/s40885-015-  
13  
14 424 0022-9  
15  
16 425 16. Culleton BF, Larson MG, Kannel WB, *et al.* Serum Uric Acid and Risk for  
17  
18 426 Cardiovascular Disease and Death: The Framingham Heart Study. *Ann Intern Med*  
19  
20 427 1999; 131:7-13  
21  
22 428 17. Chang CC, Wu CH, Liu LK, *et al.* Association between Serum Uric Acid and  
23  
24 429 Cardiovascular Risk in Nonhypertensive and Nondiabetic Individuals: The Taiwan I-  
25  
26 430 Lan Longitudinal Aging Study. *Sci Rep* 2018; 8:5234, DOI:10.1038/s41598-018-  
27  
28 431 22997-0  
29  
30 432 18. Høiegggen A, Alderman MH, Kjeldsen SE, *et al.* The Impact of Serum uric Acid on  
31  
32 433 Cardiovascular Outcomes in LIFE Study. *Kidney Int* 2004; 65:1041-1049  
33  
34 434 19. Borghi C, Rodriguez-Artalejo F, De Backer G, *et al.* Serum Uric Acid Levels are  
35  
36 435 Associated with Cardiovascular Risk Score: A Post hoc Analysis of the EURIKA  
37  
38 436 Study. *Int J of Cardiol* 2018; 253:167-173  
39  
40 437 20. Rahimi-Sakak F, Maroofi M, Rahmani J, *et al.* Serum Uric Acid and Risk of  
41  
42 438 Cardiovascular Mortality: A Systematic Review and Dose-response Meta-analysis of  
43  
44 439 Cohort Studies of over a Million Participants. *BMC Cardiovasc Disord* 2019; 19:218,  
45  
46 440 <https://doi.org/10.1186/s12872-019-1215-z>  
47  
48 441 21. Chobanian AV, Bakris GL, Black HR, *et al.* The Seventh Report of The JNC on  
49  
50 442 Prevention, Detection and Treatment of High Blood Pressure: The JNC 7 Report. *J*  
51  
52 443 *Am Med Assoc* 2003; 289(19): 2560-72.  
53  
54  
55  
56  
57  
58  
59  
60



- 1  
2  
3 444 22. Whelton PK, Carey RM, Aronow WS, *et al.* 2017 ACC/AHA/AAPA/ABC/ACPM/  
4  
5 445 AGS/APhA/ASH/ASPC/NMA/PCNA Guideline for the Prevention, Detection,  
6  
7 446 Evaluation, and Management of High Blood Pressure in Adults: Executive Summary.  
8  
9 447 A Report of the American College of Cardiology/American Heart Association Task  
10  
11 448 Force on Clinical Practice Guidelines. *Hypertension* 2018; 71(6):1269-1324.
- 12  
13  
14 449 23. Sja'bani M. Hypertension and Renoprotective Effects of High Serum Uric Acid  
15  
16 450 Treatment. In Annual Scientific Meeting of Indonesian Nephrology in Palembang.  
17  
18 451 South Sumatra, Indonesia: Lembaga Penerbit Ilmu Penyakit Dalam, Bagian Ilmu  
19  
20 452 Penyakit Dalam Fakultas Kedokteran UNSRI, Palembang. 2014.
- 21  
22  
23 453 24. IBM Corp. Released 2013. IBM SPSS Statistics for Windows, Version 22.0. Armonk,  
24  
25 454 NY: IBM Corp
- 26  
27  
28 455 25. Zhang W, Sun K, Yang Y, *et al.* Plasma Uric Acid and  
29  
30 456 Hypertension in a Chinese Community: Prospective Study and Meta-Analysis. *Clin*  
31  
32 457 *Chem* 2009; 55:2026–34.
- 33  
34  
35 458 26. Kawabe M, Sato A, Hoshi T, *et al.* Gender Differences in The Association Between  
36  
37 459 Serum Uric Acid and Prognosis in Patients with Acute Coronary Syndrome. *J Cardiol*  
38  
39 460 2016; 67:170–176.
- 40  
41  
42 461 27. Zhang C, Liu R, Yuan J, *et al.* Gender-related Differences in The Association  
43  
44 462 between Serum Uric Acid and Left Ventricular Mass Index in Patients with  
45  
46 463 Obstructive Hypertrophic Cardiomyopathy. *Biol Sex Differ* 2016; 7:22.
- 47  
48  
49 464 28. Hak AE, Curhan GC, Grodstein F, *et al.* Menopause, post-menopausal hormone use  
50  
51 465 and risk of incident gout. *Ann Rheum Dis* 2010;69(7):1305-9.
- 52  
53  
54 466 29. Freedman DS, Williamson DF, Gunter EW, *et al.* Relation of serum uric acid to  
55  
56 467 mortality and ischemic heart disease. The NHANES I Epidemiologic Followup Study.  
57  
58 468 *Am J Epidemiol* 1995; 141:637–44.
- 59  
60

- 1  
2  
3 469 30. Kim SY, Guevara JP, Kim KM, *et al.* Hyperuricemia and coronary heart disease: a  
4  
5 470 systematic review and meta-analysis. *Arthritis Care Res (Hoboken)* 2010; 62:170–80.  
6  
7  
8 471 31. Droyvold WB, Midtjhell K, Nilsen TIL, *et al.* Change in Body Mass Index and Its  
9  
10 472 Impact on Blood Pressure: A Prospective Population Study. *Int J Obes.* 2005; 29:650-  
11  
12 473 655.  
13  
14 474 32. Rodrigues SL, Baldo MP, Capingana DP, *et al.* Gender Difference of Serum Uric  
15  
16 475 Acid and Cardiovascular Risk Factors: Population Based Study. *Arq Bras Cardiol.*  
17  
18 476 2011.  
19  
20 477 33. Li C, Hsieh MC, Chang SJ. Metabolic Syndrome, Diabetes, and Hyperuricemia. *Curr*  
21  
22 478 *Opin Rheumatol.* 2013; 25:210-216.  
23  
24 479 34. Yan Q, Sun D, Li X, *et al.* Association of Blood Glucose Level and Hypertension in  
25  
26 480 Elderly Chinese Subjects: A Community Based Study. *BMC Endocr Disord.* 2016;  
27  
28 481 16:40.  
29  
30 482 35. Kawamoto R, Tabara Y, Kohara K, *et al.* Serum Uric Acid is More Strongly  
31  
32 483 Associated with Impaired Fasting Blood Glucose in Women Than in Men From A  
33  
34 484 Community-Dwelling Population. *PLoS One.* 2013; 8(6):1-5.  
35  
36 485 36. Peng TC, Wang CC, Kao TW, *et al.* Relationship between Hyperuricemia and Lipid  
37  
38 486 Profiles in US Adults. *BioMed Res Int.* 2015.  
39  
40 487 37. Maruhashi T, Nakashima A, Soga J, *et al.* Hyperuricemia is Independently Associated  
41  
42 488 with Endothelial Dysfunction in Post-Menopausal Women but not in Pre-Menopausal  
43  
44 489 Women. *BMJ Open.* 2013; 3:e003659.  
45  
46  
47  
48  
49  
50  
51 490  
52  
53 491  
54  
55 492  
56  
57  
58  
59  
60

1  
2  
3 **493 Figure Legend**  
4

5  
6 494 Figure 1. Data collection was conducted twice in 2007 (resulting in a collection of  
7  
8 495 prehypertensive population of 4190 patients) and 2017 (to collect the study sample of 733  
9  
10 496 and obtained physical and laboratory examinations data)

11  
12 497 Figure 2. The SUA/serum uric acid levels were significantly associated with total cholesterol  
13  
14 498 (p=0.001), LDL/low density lipoprotein (p=0.002), HDL/high density lipoprotein (p<0.001),  
15  
16 499 triglycerides (p<0.001) and fasting blood glucose (p=0.030). The SUA category: normal (<5  
17  
18 500 mg/dL), high-normal (5–7 mg/dL), and high ( $\geq$ 7 mg/dL).  
19  
20

21 501 Figure 3. Significant differences were found in BMI (p<0.001) and triglycerides (p=0.002)  
22  
23 502 between subjects with normal SUA levels and those with high-normal and high SUA levels in  
24  
25 503 men. No significant difference was found (p>0.05) between subjects with normal SUA levels  
26  
27 504 and those with high-normal and high SUA levels in women. The SUA category: normal (<5  
28  
29 505 mg/dL), high-normal (5–7 mg/dL), and high ( $\geq$ 7 mg/dL).  
30  
31  
32

33 506  
34  
35  
36  
37  
38  
39  
40  
41  
42  
43  
44  
45  
46  
47  
48  
49  
50  
51  
52  
53  
54  
55  
56  
57  
58  
59  
60

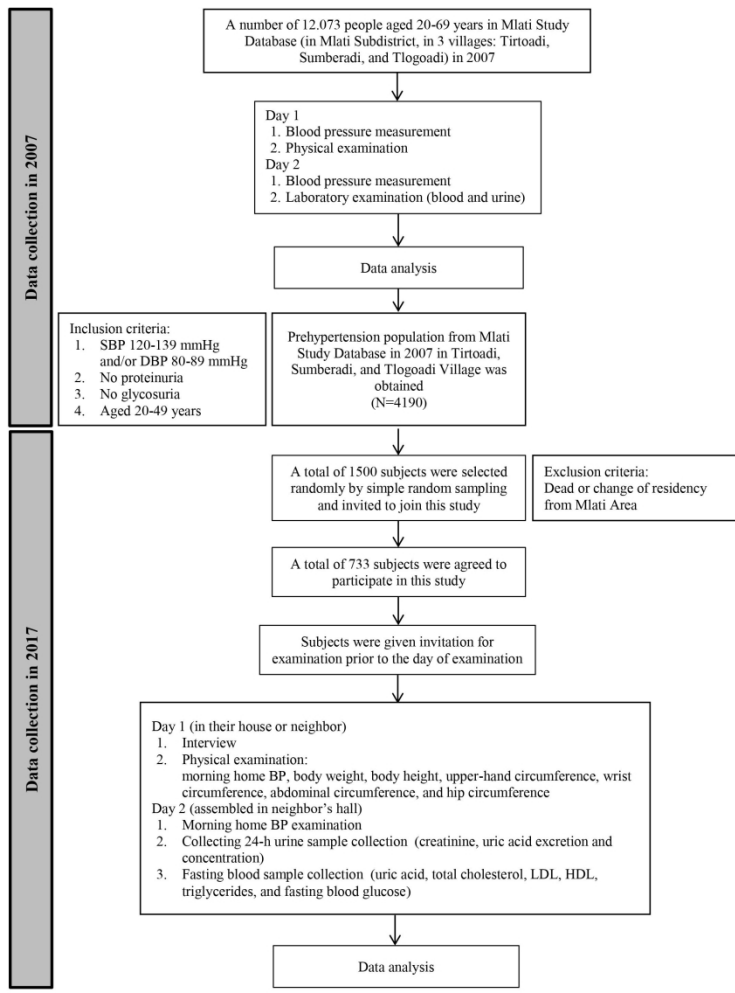

Fig 1. Study Flow Chart

Fig 1. Study Flow Chart

210x297mm (300 x 300 DPI)



**Fig. 2.** Mean of cardiovascular risk factors in different serum uric acid levels  
 The SUA/serum uric acid levels were significantly associated with total cholesterol ( $p=0.001$ ), LDL/low density lipoprotein ( $p=0.002$ ), HDL/high density lipoprotein ( $p<0.001$ ), triglycerides ( $p<0.001$ ) and fasting blood glucose ( $p=0.030$ ).

Figure 2. Mean of cardiovascular risk factors in different serum uric acid levels

210x297mm (300 x 300 DPI)



**Fig. 3.** Mean of cardiovascular risk factors in men and women between normal and high-normal/high SUA levels. In men, BMI, LDL, triglyceride and fasting blood glucose values were analysed using the Mann-Whitney U test; total cholesterol and HDL levels were analysed using independent samples t-tests. In women, BMI, total cholesterol, LDL, HDL and triglyceride levels were analysed using the Mann-Whitney U test; fasting blood glucose was analysed using independent samples t-tests.

Figure 3. Mean of cardiovascular risk factors in men and women between normal and high-normal/high SUA levels.

210x297mm (300 x 300 DPI)

**STROBE 2007 (v4) Statement—Checklist of items that should be included in reports of *cross-sectional studies***

| Section/Topic                | Item # | Recommendation                                                                                                                                                                       | Reported on page # |
|------------------------------|--------|--------------------------------------------------------------------------------------------------------------------------------------------------------------------------------------|--------------------|
| <b>Title and abstract</b>    | 1      | (a) Indicate the study’s design with a commonly used term in the title or the abstract                                                                                               | 2                  |
|                              |        | (b) Provide in the abstract an informative and balanced summary of what was done and what was found                                                                                  | 2                  |
| <b>Introduction</b>          |        |                                                                                                                                                                                      |                    |
| Background/rationale         | 2      | Explain the scientific background and rationale for the investigation being reported                                                                                                 | 3                  |
| Objectives                   | 3      | State specific objectives, including any prespecified hypotheses                                                                                                                     | 4                  |
| <b>Methods</b>               |        |                                                                                                                                                                                      |                    |
| Study design                 | 4      | Present key elements of study design early in the paper                                                                                                                              | 5                  |
| Setting                      | 5      | Describe the setting, locations, and relevant dates, including periods of recruitment, exposure, follow-up, and data collection                                                      | 5                  |
| Participants                 | 6      | (a) Give the eligibility criteria, and the sources and methods of selection of participants                                                                                          | 5                  |
| Variables                    | 7      | Clearly define all outcomes, exposures, predictors, potential confounders, and effect modifiers. Give diagnostic criteria, if applicable                                             | 8                  |
| Data sources/<br>measurement | 8*     | For each variable of interest, give sources of data and details of methods of assessment (measurement). Describe comparability of assessment methods if there is more than one group | 6                  |
| Bias                         | 9      | Describe any efforts to address potential sources of bias                                                                                                                            | 17-18              |
| Study size                   | 10     | Explain how the study size was arrived at                                                                                                                                            | 5                  |
| Quantitative variables       | 11     | Explain how quantitative variables were handled in the analyses. If applicable, describe which groupings were chosen and why                                                         | 8                  |
| Statistical methods          | 12     | (a) Describe all statistical methods, including those used to control for confounding                                                                                                | 8                  |
|                              |        | (b) Describe any methods used to examine subgroups and interactions                                                                                                                  | 8                  |
|                              |        | (c) Explain how missing data were addressed                                                                                                                                          | N/A                |
|                              |        | (d) If applicable, describe analytical methods taking account of sampling strategy                                                                                                   | N/A                |
|                              |        | (e) Describe any sensitivity analyses                                                                                                                                                |                    |
| <b>Results</b>               |        |                                                                                                                                                                                      |                    |

|                          |     |                                                                                                                                                                                                              |                       |
|--------------------------|-----|--------------------------------------------------------------------------------------------------------------------------------------------------------------------------------------------------------------|-----------------------|
| Participants             | 13* | (a) Report numbers of individuals at each stage of study—eg numbers potentially eligible, examined for eligibility, confirmed eligible, included in the study, completing follow-up, and analysed            | Figure 1              |
|                          |     | (b) Give reasons for non-participation at each stage                                                                                                                                                         | N/A                   |
|                          |     | (c) Consider use of a flow diagram                                                                                                                                                                           | Figure 1              |
| Descriptive data         | 14* | (a) Give characteristics of study participants (eg demographic, clinical, social) and information on exposures and potential confounders                                                                     | 9                     |
|                          |     | (b) Indicate number of participants with missing data for each variable of interest                                                                                                                          | N/A                   |
| Outcome data             | 15* | Report numbers of outcome events or summary measures                                                                                                                                                         | 8                     |
| Main results             | 16  | (a) Give unadjusted estimates and, if applicable, confounder-adjusted estimates and their precision (eg, 95% confidence interval). Make clear which confounders were adjusted for and why they were included | 10-14                 |
|                          |     | (b) Report category boundaries when continuous variables were categorized                                                                                                                                    | Written on each table |
|                          |     | (c) If relevant, consider translating estimates of relative risk into absolute risk for a meaningful time period                                                                                             | N/A                   |
| Other analyses           | 17  | Report other analyses done—eg analyses of subgroups and interactions, and sensitivity analyses                                                                                                               | N/A                   |
| <b>Discussion</b>        |     |                                                                                                                                                                                                              |                       |
| Key results              | 18  | Summarise key results with reference to study objectives                                                                                                                                                     | 14                    |
| Limitations              | 19  | Discuss limitations of the study, taking into account sources of potential bias or imprecision. Discuss both direction and magnitude of any potential bias                                                   | 17                    |
| Interpretation           | 20  | Give a cautious overall interpretation of results considering objectives, limitations, multiplicity of analyses, results from similar studies, and other relevant evidence                                   | 14-17                 |
| Generalisability         | 21  | Discuss the generalisability (external validity) of the study results                                                                                                                                        | 18                    |
| <b>Other information</b> |     |                                                                                                                                                                                                              |                       |
| Funding                  | 22  | Give the source of funding and the role of the funders for the present study and, if applicable, for the original study on which the present article is based                                                | 19                    |

\*Give information separately for cases and controls in case-control studies and, if applicable, for exposed and unexposed groups in cohort and cross-sectional studies.

**Note:** An Explanation and Elaboration article discusses each checklist item and gives methodological background and published examples of transparent reporting. The STROBE checklist is best used in conjunction with this article (freely available on the Web sites of PLoS Medicine at <http://www.plosmedicine.org/>, Annals of Internal Medicine at <http://www.annals.org/>, and Epidemiology at <http://www.epidem.com/>). Information on the STROBE Initiative is available at [www.strobe-statement.org](http://www.strobe-statement.org).



# BMJ Open

## Association of serum uric acid, morning home blood pressure and cardiovascular risk factors in a population with previous prehypertension : a cross-sectional study

|                                 |                                                                                                                                                                                                                                                                                                                                                                                                                                                                                                                                                                                                                                                                                        |
|---------------------------------|----------------------------------------------------------------------------------------------------------------------------------------------------------------------------------------------------------------------------------------------------------------------------------------------------------------------------------------------------------------------------------------------------------------------------------------------------------------------------------------------------------------------------------------------------------------------------------------------------------------------------------------------------------------------------------------|
| Journal:                        | <i>BMJ Open</i>                                                                                                                                                                                                                                                                                                                                                                                                                                                                                                                                                                                                                                                                        |
| Manuscript ID                   | bmjopen-2020-038046.R3                                                                                                                                                                                                                                                                                                                                                                                                                                                                                                                                                                                                                                                                 |
| Article Type:                   | Original research                                                                                                                                                                                                                                                                                                                                                                                                                                                                                                                                                                                                                                                                      |
| Date Submitted by the Author:   | 29-Jul-2020                                                                                                                                                                                                                                                                                                                                                                                                                                                                                                                                                                                                                                                                            |
| Complete List of Authors:       | Bawazier, Lucky ; Universitas Indonesia, Department of Internal Medicine, Faculty of Medicine<br>Sja'bani, Mochammad; Universitas Gadjah Mada, Mlati Study, Department of Internal Medicine, Faculty of Medicine, Public Health and Nursing<br>Irijanto, Fredie; DR. Soeradji Tirtonegoro Hospital<br>Zulaela, Zulaela; Universitas Gadjah Mada, Faculty of Mathematics and Natural Sciences<br>Widiatmoko, Agus; Universitas Muhammadiyah Yogyakarta, Department of Internal Medicine, Faculty of Medicine and Health Sciences<br>Kholiq, Abdul; Universitas Muhammadiyah Yogyakarta, Faculty of Medicine and Health Sciences<br>Tomino, Yasuhiko; Medical Corporation Group Showakai |
| <b>Primary Subject Heading</b>: | Public health                                                                                                                                                                                                                                                                                                                                                                                                                                                                                                                                                                                                                                                                          |
| Secondary Subject Heading:      | Epidemiology                                                                                                                                                                                                                                                                                                                                                                                                                                                                                                                                                                                                                                                                           |
| Keywords:                       | Hypertension < CARDIOLOGY, PUBLIC HEALTH, EPIDEMIOLOGY                                                                                                                                                                                                                                                                                                                                                                                                                                                                                                                                                                                                                                 |
|                                 |                                                                                                                                                                                                                                                                                                                                                                                                                                                                                                                                                                                                                                                                                        |

SCHOLARONE™  
Manuscripts

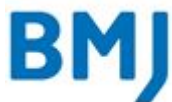

I, the Submitting Author has the right to grant and does grant on behalf of all authors of the Work (as defined in the below author licence), an exclusive licence and/or a non-exclusive licence for contributions from authors who are: i) UK Crown employees; ii) where BMJ has agreed a CC-BY licence shall apply, and/or iii) in accordance with the terms applicable for US Federal Government officers or employees acting as part of their official duties; on a worldwide, perpetual, irrevocable, royalty-free basis to BMJ Publishing Group Ltd ("BMJ") its licensees and where the relevant Journal is co-owned by BMJ to the co-owners of the Journal, to publish the Work in this journal and any other BMJ products and to exploit all rights, as set out in our [licence](#).

The Submitting Author accepts and understands that any supply made under these terms is made by BMJ to the Submitting Author unless you are acting as an employee on behalf of your employer or a postgraduate student of an affiliated institution which is paying any applicable article publishing charge ("APC") for Open Access articles. Where the Submitting Author wishes to make the Work available on an Open Access basis (and intends to pay the relevant APC), the terms of reuse of such Open Access shall be governed by a Creative Commons licence – details of these licences and which [Creative Commons](#) licence will apply to this Work are set out in our licence referred to above.

Other than as permitted in any relevant BMJ Author's Self Archiving Policies, I confirm this Work has not been accepted for publication elsewhere, is not being considered for publication elsewhere and does not duplicate material already published. I confirm all authors consent to publication of this Work and authorise the granting of this licence.

1  
2  
3 1 **Association of serum uric acid, morning home blood pressure and cardiovascular risk**  
4  
5 2 **factors in a population with previous prehypertension : a cross-sectional study**  
6  
7  
8 3

9  
10 4 **Lucky A Bawazier<sup>1,2</sup>, Mochammad Sja'bani<sup>1</sup>, Freddie Irijanto<sup>1,3</sup>, Zulaela<sup>1,4</sup>, Agus**  
11  
12 5 **Widiatmoko<sup>1,5</sup>, Abdul Kholiq<sup>1,6</sup>, Yasuhiko Tomino<sup>7</sup>**  
13  
14 6

15  
16 7 <sup>1</sup> Mlati Study Group, Department of Internal Medicine, Faculty of Medicine, Public Health and Nursing,  
17  
18 8 Universitas Gadjah Mada, Yogyakarta, Indonesia

19  
20 9 <sup>2</sup> Department of Internal Medicine, Faculty of Medicine, Universitas Indonesia, Jakarta, Indonesia

21  
22 10 <sup>3</sup> Dr. Soeradji Tirtonegoro General Hospital, Klaten, Central Java, Indonesia

23  
24 11 <sup>4</sup> Department of Mathematics, Faculty of Mathematics and Natural Sciences, Universitas Gadjah Mada,  
25  
26 12 Yogyakarta, Indonesia

27  
28 13 <sup>5</sup> Department of Internal Medicine, Faculty of Medicine, Universitas Muhammadiyah Yogyakarta, Yogyakarta,  
29  
30 14 Indonesia

31  
32 15 <sup>6</sup> Faculty of Medicine, Universitas Muhammadiyah Yogyakarta, Yogyakarta, Indonesia

33  
34 16 <sup>7</sup> Medical Corporation SHOWAKAI, Tokyo, Japan  
35  
36 17

37  
38 18 **Correspondence:**

39  
40 19 Name : Mochammad Sja'bani

41  
42 20 Address : Perumahan Nandan Griya Idaman, Jalan Nandan Baru 19A Sleman,  
43  
44 21 Yogyakarta 55284, Indonesia

45  
46 22 Telephone : +62811282830

47  
48 23 Fax : +62274 625225

49  
50 24 Email : msbani\_jogja@yahoo.com  
51  
52 25

53  
54  
55  
56 26 **Word count: 3845**  
57  
58  
59  
60

**ABSTRACT**

**Objective:** To observe the changes in blood pressure (BP) over 10 years and to investigate current BP association to serum uric acid (SUA) levels and cardiovascular risk factors in the epidemiological data of a target group of prehypertensive patients in 2007.

**Design:** cross-sectional study

**Setting:** Mlati Sub-district, Sleman District, Yogyakarta Province, Indonesia

**Participants:** A total of 733 patients from “Mlati Study Database” in 2007 were selected by simple random sampling using statistical software. Subjects had both physical and laboratory examinations.

**Outcome measures:** Morning home blood pressure and laboratory examination of urine (uric acid excretion and creatinine) and blood samples (SUA, blood urea nitrogen, creatinine, a lipid profile, and fasting blood glucose levels)

**Results:** About 31.1% of 733 prehypertensive subjects became hypertension after 10 years, 24.6% returned to normal tension, and the rest of it remained in prehypertensive state. Mean (SD) of SUA levels in 2017 were significantly higher in men than in women (5.78 (1.25) mg/dL vs 4.52 (1.10) mg/dL,  $p < 0.001$ ). Furthermore, men tended to have high-normal (5–7 mg/dL) or high SUA levels ( $\geq 7$  mg/dL) compared to women ( $p < 0.001$ , RR=2.60). High-normal and high SUA levels in population with a history of prehypertension were significantly associated with current prehypertension and hypertension only in women ( $p = 0.001$ , RR=1.21). Age and body mass index was found to be significantly associated with both systolic and diastolic BP in men, but only with systolic BP in women. Fasting blood glucose and SUA levels were significantly associated with systolic and diastolic BP only in women.

1  
2  
3 51 **Conclusion:** We concluded that after 10 years, of 733 prehypertensive subjects, 31.1%  
4  
5  
6 52 became hypertensive. The SUA levels in men are significantly higher than those in women.  
7  
8 53 Moreover, high-normal and high SUA levels were significantly associated with  
9  
10 54 prehypertension and hypertension in women but not in men.  
11  
12

13 55

14 56 **Keywords:** blood pressure, serum uric acid, cardiovascular risk factor, gender differences  
15  
16  
17 57

18 58

## 19 58 **STRENGTH AND LIMITATION OF THIS STUDY**

- 20  
21 59
- 22 • This study followed up the changes in blood pressure on subjects for over 10 years.
  - 23 • The association between serum uric acid, blood pressure, and cardiovascular risk factors  
24 60 were analysed based on gender.  
25  
26 61
  - 27 • The analysis' was also performed by using both JNC 7 and 2017 ACC/AHA guideline.  
28  
29 62
  - 30 • This study could not present the changes of all measured values over 10 year period  
31 63 because, in the prior study in 2007, these laboratory values were not examined, except  
32  
33 64 for blood pressure.  
34  
35 65  
36  
37  
38 66
- 39  
40  
41  
42  
43  
44  
45  
46  
47  
48  
49  
50  
51  
52  
53  
54  
55  
56  
57  
58  
59  
60

## 67 INTRODUCTION

68 Hypertension is still a major problem worldwide, as reflected by a meta-analysis report  
69 in 2016 stating that in 2010, 40% of the world's population was hypertensive and that  
70 approximately 17 million people worldwide died due to hypertension.[1] In Indonesia, the  
71 prevalence of hypertension in 2013 was 25.8%, based on the Indonesian Ministry of Health  
72 report.[2] Therefore, it is important to facilitate the early diagnosis and treatment of  
73 hypertension and its possible effects. Patients with prehypertension were hypothesized to  
74 eventually become hypertensive after 10 years, and thus have a poorer quality of life [3,4].  
75 During the last two decades, it has been repeatedly published that the incidence of  
76 hypertension is associated with even moderate increases in levels of serum uric acid (SUA)  
77 and an increased risk of cardiovascular diseases (CVD).[5,6] The Framingham Heart Study  
78 reported an increased risk of blood pressure (BP) progression in 3157 subjects with  
79 hyperuricemia. SUA was positively associated with increases in both systolic blood pressure  
80 (SBP) and diastolic blood pressure (DBP) after 4 years with no antihypertensive treatment.[7]  
81 Current findings based on a large-scale cohort study suggested that uric acid is a predictive  
82 factor of the development of prehypertension in adults.[8] A meta-analysis by Jiang *et al.*  
83 indicated that SUA was possibly associated with prehypertension but still found conflicting  
84 results.[9] The associations among SUA, hypertension, cardiovascular risk factors and gender  
85 remain controversial. Serum uric acid levels have been known to have an association with  
86 blood pressure and hypertension.[10-12] Some studies reported that hyperuricemia has higher  
87 susceptibility of developing hypertension especially in men [10,13], while the other study  
88 reported vice versa.[14] Lee *et al.* also showed that hyperuricemia in women led to a higher  
89 risk of developing hypertension than in men.[15] In terms of the association of SUA and  
90 cardiovascular risk, SUA did not have a causal role in the development of cardiovascular  
91 outcomes.[16] Another study stated that the serum uric acid level was an independent

1  
2  
3 92 predictive factor for cardiovascular risk in individuals without hypertension and diabetes.[17]  
4  
5 93 Serum uric acid also being reported to have a stronger association with cardiovascular risk  
6  
7 94 [18] and risk of cardiovascular disease mortality [19,20] in women than in men.  
8  
9

10 95 Therefore, the aim of this study was to observe the progression from prehypertension  
11  
12 96 to hypertension after 10 years (2007-2017) and the association of BP with SUA as well as  
13  
14 97 other cardiovascular risk factors in 2017.  
15  
16

17 98

## 19 99 **METHODS**

### 21 100 *Study Design*

22  
23  
24 101 This study was a cross-sectional study conducted in Mlati Sub-district, Sleman  
25  
26 102 District in the Yogyakarta Special Region, Indonesia. The protocol of this study was  
27  
28 103 approved by the Medical and Health Research Ethics Committee of Faculty of Medicine,  
29  
30 104 Public Health and Nursing, Universitas Gadjah Mada, Yogyakarta, Indonesia with the ID  
31  
32 105 approval of KE/FK/0961/EC/2017.  
33  
34

### 35 106 *Study Population*

36  
37 107 We pooled data from participants enrolled in the 2007 Mlati Study Database. The  
38  
39 108 sample of the Mlati Study included 12,073 people aged 20–69 years who lived in 3 villages  
40  
41 109 in Mlati (Tirtoadi, Sumberadi, and Tlogoadi), Sleman, Yogyakarta, Indonesia. The inclusion  
42  
43 110 criteria for the prehypertensive subgroup of the study sample were SBP of 120–139 mmHg  
44  
45 111 and/or DBP of 80–89 mmHg, no proteinuria, no glycosuria, and age between 20 and 49  
46  
47 112 years; this subgroup included 4,190 participants (current age was 30–59 years). In 2017, of  
48  
49 113 the 4,190 individuals with a history of prehypertension in 2007, 1500 subjects were selected  
50  
51 114 as participants in the current study by simple random sampling using statistical software. All  
52  
53 115 1500 subjects were invited to have a physical and laboratory examination; however, only 733  
54  
55 116 subjects who participated in the sampling were examined (the other subjects who did not  
56  
57  
58  
59  
60

1  
2  
3 117 show up during the laboratory examination were due to the change of residential area or  
4  
5 118 death or any other unknown reasons and were excluded from this study). All subjects did not  
6  
7  
8 119 take any drugs lowering BP and SUA. All subjects were provided informed consent at the  
9  
10 120 beginning of the study (Figure 1).

### 121 ***Patient and Public Involvement***

122 Patients were not involved in any of the design, analysis, and presentation of the study  
13  
14  
15  
16  
17 123 results.

### 124 ***Definition of Prehypertension and Hypertension***

125 The definitions of prehypertension and hypertension were based on the Seventh  
126 Report of Joint National Committee (JNC 7) because the newer JNC 8 report renewed only  
127 their treatment targets, not their classifications. The SBP of 120–139 mmHg and/or DBP of  
128 80–89 mmHg are defined as prehypertension, while SBP of  $\geq 140$  mmHg and/or DBP of  $\geq 90$   
129 mmHg are defined as hypertension.[21]

130 For further analysis, we applied the 2017 ACC/AHA guideline, which classifies BP as  
131 follows: (1) normal BP = SBP  $< 120$  mmHg and DBP  $< 80$  mmHg, (2) elevated BP = SBP  
132 120–129 mmHg and DBP  $< 80$  mmHg, (3) stage 1 hypertension = SBP 130–139 mmHg or  
133 DBP 80–89 mmHg, and (4) stage 2 hypertension = SBP  $\geq 140$  mmHg or DBP  $\geq 90$  mmHg.[22]

### 134 ***Serum Uric Acid Cut-off Point***

135 Based on the study by Sja'bani (2014), the cut-off point of SUA was divided into 3  
136 categories: normal ( $< 5$  mg/dL), high-normal (5–7 mg/dL), and high ( $\geq 7$  mg/dL).[23]

### 137 ***Data Collection***

138 The data collection was conducted twice during the study period. The first data  
139 collection was conducted in 2007 to collect the prehypertension population (n=4,190). The  
140 second data collection was performed in 2017 to collect samples from the Mlati Study  
141 Database by the random sampling method (n=733).



1  
2  
3 142 In 2007, interviews were conducted on 12,073 subjects to obtain demographic data  
4  
5 143 (e.g. sex and age), family history of hypertension and diabetes mellitus, patients' history of  
6  
7 144 diabetes mellitus, patients' history of consuming hypertension and uric acid drugs, and to  
8  
9 145 perform physical and laboratory examinations. Physical examinations, which included  
10  
11 146 measurements of morning home BP (measured by using sphygmomanometer), body weight,  
12  
13 147 body height, upper-hand circumference, wrist circumference, abdominal circumference, and  
14  
15 148 hip circumference, were conducted on day 1 in subject's house or their neighbor. BP  
16  
17 149 measurements were performed in the morning (at 6 – 8 a.m) by the medical team for 2 times  
18  
19 150 (or until stable BP were obtained) while subjects in sitting position. On day 2, we examined  
20  
21 151 morning home BP and took urine and blood samples.  
22  
23  
24  
25

26 152 In 2017, we collected data from 733 subjects, including interviews of demographic  
27  
28 153 data, physical and laboratory examinations. On the first day, subjects were interviewed,  
29  
30 154 physically examined, and given urine containers for one-time urine samples, as well as for a  
31  
32 155 24-h urine collection that had to be submitted on day 2, in their home or neighbour. The  
33  
34 156 physical examination was performed by the medical team, consisting of a morning home BP  
35  
36 157 measurement in the morning (at 6 – 8 a.m) for 2 times (or until stable BP were obtained),  
37  
38 158 while subjects in sitting position, using the Omron HEM-907 digital automatic blood pressure  
39  
40 159 monitor (manufactured by Omron Healthcare Co., Ltd, Kyoto, Japan) and measurements of  
41  
42 160 body weight, body height, upper-hand circumference, wrist circumference, abdominal  
43  
44 161 circumference, and hip circumference. On the second day, subjects who were in fasting  
45  
46 162 condition were invited to come to the neighbour's hall in the morning and physically  
47  
48 163 examined for BP again (at 6 – 8 a.m) and drawn for their blood. Urine and blood samples  
49  
50 164 were examined in the laboratory (Prodia Laboratory, Yogyakarta, Indonesia). A 24-h urine  
51  
52 165 sample was collected to measure uric acid excretion and creatinine, and a blood sample was  
53  
54 166 collected to measure SUA, blood urea nitrogen, creatinine, a lipid profile (total cholesterol,  
55  
56  
57  
58  
59  
60

1  
2  
3 167 low-density lipoprotein/LDL-C, high-density lipoprotein/HDL-C and triglycerides), and  
4  
5 168 fasting blood glucose levels.  
6  
7

### 8 169 *Statistical Analysis*

9

10 170 The outcomes of this study were presented in two primary analyses which were (1)  
11  
12 171 blood pressure changes during the period of 2007-2017 to measure the progression from  
13  
14 172 prehypertension (2007) to hypertension (2017), and (2) the association of current BP with  
15  
16 173 SUA levels and cardiovascular risk factors. Additional analyses were also performed to  
17  
18 174 observe the SUA association with cardiovascular risk factors. The data analyses were mostly  
19  
20 175 performed based on gender to know about the gender differences in the analyses mentioned  
21  
22 176 above.  
23  
24  
25

26 177 Data presented later in the results section were collected in 2007 and 2017. Data were  
27  
28 178 analysed using IBM SPSS Statistics for Windows, Version 22.0.[24] The data consisted of  
29  
30 179 continuous and categorical data, which were expressed as the mean (SD) for continuous data  
31  
32 180 and as numbers and percentages for categorical data. The continuous variables were analysed  
33  
34 181 and compared by independent samples t-tests and nonparametric Mann-Whitney U tests. The  
35  
36 182 categorical variables were analysed and compared by Pearson chi-square tests. Blood  
37  
38 183 pressure changes during the period of 2007-2017 were presented using frequencies and  
39  
40 184 percentages. The associations of current BP with SUA levels and gender were analysed using  
41  
42 185 the Pearson chi-square test. Multivariable analysis was performed using multiple linear  
43  
44 186 regressions to describe the association between SUA levels and BP, with adjustment for age  
45  
46 187 and cardiovascular risk factors. Additional analysis to observe the association between SUA  
47  
48 188 levels and cardiovascular risk factors and gender were performed using independent samples  
49  
50 189 t-tests and nonparametric Mann-Whitney U tests. The significance of associations between  
51  
52 190 categorical and numerical variables was determined using 95% confidence intervals (CIs).  
53  
54  
55  
56  
57  
58  
59  
60

192 **RESULTS****Table 1.** Characteristics of Subjects by Gender in 2017 in Mean (SD)

| Variables                     | Men<br>n=306 | Women<br>n=427 | p-value |
|-------------------------------|--------------|----------------|---------|
| Age (years)                   | 46 (7.71)    | 46 (7.76)      | 0.431   |
| 30 – 39 years                 | 35 (2.86)    | 36(2.63)       | 0.093   |
| 40 – 49 years                 | 45 (2.89)    | 45 (2.67)      | 0.372   |
| 50 – 59 years                 | 54 (3.18)    | 54 (2.77)      | 0.779   |
| BMI (kg/m <sup>2</sup> )      | 23.5 (3.70)  | 25.7 (4.81)    | <0.001* |
| SBP (mmHg)                    | 132 (17.26)  | 134 (21.62)    | 0.595   |
| DBP (mmHg)                    | 78 (11.96)   | 79 (12.32)     | 0.091   |
| Uric Acid (mg/dL)             | 5.8 (1.25)   | 4.5 (1.10)     | <0.001* |
| Total cholesterol (mg/dL)     | 167 (36.86)  | 166 (41.59)    | 0.559   |
| LDL (mg/dL)                   | 109 (29.59)  | 106 (33.27)    | 0.155   |
| HDL (mg/dL)                   | 41 (10.02)   | 47 (12.20)     | <0.001* |
| Triglyceride (mg/dL)          | 129 (79.09)  | 103 (63.84)    | <0.001* |
| Fasting Blood Glucose (mg/dL) | 100 (37.22)  | 97 (33.70)     | 0.101   |

\*Significant (p&lt;0.05)

193 The subjects of this study consisted of 733 adults (aged 30–59 years) living in the  
 194 Mlati Subdistrict; 306 (41.75%) and 427 (58.25%) were men and women, respectively. The  
 195 characteristics of the subjects (by gender) are presented in Table 1. There was no significant  
 196 difference in age, SBP, DBP, total cholesterol, LDL, and fasting blood glucose between men  
 197 and women (p>0.05). Significant differences were found in body mass index (BMI)  
 198 (p<0.001), SUA levels (p<0.001), HDL (p<0.001) and triglycerides (p<0.001). BMI and  
 199 HDL were significantly higher in women, whereas SUA levels and triglycerides were  
 200 significantly higher in men.

**Table 2.** Blood Pressure changes after 10 years and Serum Uric Acid Frequency Distribution (n=733)

| Variables                | Frequency (%) |            |
|--------------------------|---------------|------------|
|                          | 2007          | 2017       |
| BP <sup>a</sup>          |               |            |
| Normal                   | 0             | 180 (24.6) |
| Prehypertension (Pre-HT) | 733 (100)     | 325 (44.3) |
| Hypertension (HT)        | 0             | 228 (31.1) |
| SUA <sup>b</sup>         |               |            |
| Normal                   | -             | 369 (50.3) |
| High-normal              | -             | 316 (43.1) |

High - 48 (6.6)

<sup>a</sup> BP (blood pressure), normal: SBP < 120 mmHg and DBP < 80 mmHg, prehypertension: SBP of 120–139 mmHg and/or DBP of 80–89 mmHg, hypertension: SBP of ≥140 mmHg and/or DBP of ≥90 mmHg)

<sup>b</sup> SUA (serum uric acid), normal <5 mg/dL, high-normal = 5–7 mg/dL, and high ≥7 mg/dL

201

202 After 10 years, among the 733 prehypertensive subjects, 180 (24.6%) returned to  
 203 normal blood pressure, 325 (44.3%) remained in a prehypertensive state, and 228 (31.1%)  
 204 became hypertensive. For SUA levels, 50.3% had normal SUA, 43.1% were high-normal,  
 205 and only 6.6% had high SUA levels (Table 2).

**Table 3.** Association between Gender, Age, BMI, Uric Acid Excretion, and Uric Acid Concentration to Serum Uric Acid Level

| Variables                               | SUA <sup>a</sup>         |            | P value | RR   | 95% CI      |
|-----------------------------------------|--------------------------|------------|---------|------|-------------|
|                                         | High-normal and high (%) | Normal (%) |         |      |             |
| Gender                                  |                          |            |         |      |             |
| Men                                     | 237 (32.3)               | 69 (9.4)   | <0.001  | 2.60 | 2.22-3.05   |
| Women                                   | 127 (17.3)               | 300 (40.9) |         |      |             |
| Age                                     |                          |            |         |      |             |
| Men                                     |                          |            |         |      |             |
| 30 – 39 years*                          | 52 (17.0)                | 11 (3.6)   | -       | 1    | -           |
| 40 – 49 years                           | 104 (34.0)               | 22 (7.2)   | 1,000   | 1.00 | 0.87-1.15   |
| 50 – 59 years                           | 81 (26.5)                | 36 (11.8)  | 0.053   | 0.84 | 0.71-0.99   |
| Women                                   |                          |            |         |      |             |
| 30 – 39 years*                          | 22 (5.2)                 | 85 (19.9)  | -       | 1    | -           |
| 40 – 49 years                           | 40 (9.4)                 | 128 (30.0) | 0.530   | 1.16 | 0.73-1.84   |
| 50 – 59 years                           | 65 (15.2)                | 87 (20.4)  | <0.001  | 2.08 | 1.37-3.15   |
| BMI <sup>b</sup>                        |                          |            |         |      |             |
| Overweight-Obese                        | 171 (23.3)               | 154 (21.0) | 0.153   | 1.13 | 0.96 - 1.32 |
| Underweight-normal                      | 193 (26.3)               | 215 (29.3) |         |      |             |
| Uric Acid Excretion (24-h) <sup>c</sup> |                          |            |         |      |             |
| High                                    | 169 (23.1)               | 130 (17.7) | 0.002   | 1.32 | 1.10 - 1.57 |
| Normal                                  | 195 (26.6)               | 239 (32.6) |         |      |             |
| Uric Acid Concentration <sup>d</sup>    |                          |            |         |      |             |
| Normal                                  | 200 (27.3)               | 202 (27.5) | 0.956   | 1.00 | 0.87 – 1.16 |
| High                                    | 164 (22.4)               | 167 (22.8) |         |      |             |

\* reference category

<sup>a</sup> SUA, normal <5 mg/dL, high-normal = 5–7 mg/dL, and high ≥7 mg/dL

<sup>b</sup> BMI= body mass index, <18.5kg/m<sup>2</sup> = underweight, 18.5-24.9 kg/m<sup>2</sup> = normal, 25-29.9 kg/m<sup>2</sup> = overweight, >30 kg/m<sup>2</sup> = obese

<sup>c</sup> Uric acid excretion, <435.08 mg/day = normal, ≥435.08 mg/day = high

<sup>d</sup> Uric acid concentration (mg per 100 ml of urine), <46.63 mg% = normal, ≥46.63 mg% = high

206

1  
2  
3 207 In men, 32.3% of the subjects had high-normal or high levels of SUA, while in  
4  
5  
6 208 women, only 17.3% had high-normal or high levels of SUA. There was a significant  
7  
8 209 difference in SUA between men and women ( $p < 0.001$ ,  $RR = 2.60$ , 95%  $CI = 2.22-3.05$ ). When  
9  
10 210 gender was further analysed by age distribution, age was significantly associated with SUA  
11  
12 211 levels only in women aged 50–59 years ( $p < 0.001$ ,  $RR = 2.08$ , 95%  $CI = 1.36-3.15$ ).  
13  
14 212 Additionally, there was a significant association between SUA levels and uric acid excretion  
15  
16 213 by 24-h urine ( $p = 0.002$ ,  $RR = 1.32$ , 95%  $CI = 1.10-1.57$ ). On the other hand, no significant  
17  
18 214 association was observed between SUA levels and BMI ( $p = 0.153$ ,  $RR = 1.1$ , 95%  $CI = 0.96-$   
19  
20 215  $1.32$ ) or between SUA levels and uric acid concentration ( $p = 0.100$ ,  $RR = 0.786$ , 95%  
21  
22 216  $CI = 0.59-1.05$ ) (Table 3).

26 217 The associations between gender and SUA levels on BP are shown in Table 4. There  
27  
28 218 was no significant association between gender and BP ( $p = 0.584$ ). To examine the association  
29  
30 219 between uric acid and hypertension, we compared SUA levels and morning home BP. The  
31  
32 220 association between SUA levels and BP was statistically significant ( $p = 0.008$ ,  $RR = 1.12$ , 95%  
33  
34 221  $CI = 1.03-1.22$ ). In subjects with previous history of prehypertension, high-normal SUA or  
35  
36 222 high SUA levels were associated with current prehypertension or hypertension. Furthermore,  
37  
38 223 the association between SUA levels and BP in men and women is also described in Table 4.  
39  
40 224 In men, SUA levels were not significantly associated with BP ( $p = 0.805$ ,  $RR = 1.02$ , 95%  
41  
42 225  $CI = 0.88-1.19$ ). However, there was a significant association between SUA levels and BP in  
43  
44 226 women ( $p = 0.001$ ,  $RR = 1.21$ , 95%  $CI = 1.09-1.34$ ). In women, the risk of having  
45  
46 227 prehypertension or hypertension was 1.21 times higher in those who had high-normal or high  
47  
48 228 SUA levels than those with normal SUA levels. Additional analysis using the 2017  
49  
50 229 ACC/AHA guideline for observing the associations between gender and SUA levels on BP  
51  
52 230 also showed similar results with the previous analysis using JNC 7 guideline regarding the  
53  
54 231 significant associations between SUA levels and BP.

**Table 4.** Association between Gender and Serum Uric Acid on Blood Pressure

| Variables            | Blood Pressure     |            |        |                    |                           |                         |        |                    |
|----------------------|--------------------|------------|--------|--------------------|---------------------------|-------------------------|--------|--------------------|
|                      | JNC 7 <sup>a</sup> |            |        |                    | 2017 ACC/AHA <sup>b</sup> |                         |        |                    |
|                      | Pre-HT and HT (%)  | Normal (%) | p      | RR (95%CI)         | HT-1 and HT-2 (%)         | Normal and elevated (%) | p      | RR (95%CI)         |
| Gender               |                    |            |        |                    |                           |                         |        |                    |
| Men                  | 234 (31.9)         | 72 (9.8)   | 0.584  | 1.02 (0.94 – 1.11) | 159 (21.7)                | 147 (20.1)              | 0.129  | 0.9 (0.79 - 1.03)  |
| Women                | 319 (43.5)         | 108 (14.7) |        |                    | 246 (33.6)                | 181 (24.7)              |        |                    |
| SUA <sup>c</sup>     |                    |            |        |                    |                           |                         |        |                    |
| High-normal and High | 290 (39.6)         | 74 (10.1)  | 0.008* | 1.12 (1.03 - 1.22) | 224 (30.6)                | 140 (19.1)              | 0.001* | 1.26 (1.10 - 1.43) |
| Normal               | 263 (35.9)         | 106 (14.5) |        |                    | 181 (24.7)                | 188 (25.6)              |        |                    |
| SUA                  |                    |            |        |                    |                           |                         |        |                    |
| Men                  |                    |            |        |                    |                           |                         |        |                    |
| High-normal and High | 182 (59.5)         | 55 (18.0)  | 0.805  | 1.02 (0.88 – 1.19) | 129 (42.2)                | 108 (35.3)              | 0.109  | 1.25 (0.93 – 1.68) |
| Normal               | 52 (17.0)          | 17 (5.6)   |        |                    | 30 (9.8)                  | 39 (12.7)               |        |                    |
| Women                |                    |            |        |                    |                           |                         |        |                    |
| High-normal and High | 108 (25.3)         | 19 (4.4)   | 0.001* | 1.21 (1.09 – 1.34) | 95 (22.2)                 | 32 (7.5)                | 0.000* | 1.49 (1.28 – 1.73) |
| Normal               | 211 (49.4)         | 89(20.8)   |        |                    | 151 (35.4)                | 149 (34.9)              |        |                    |

<sup>a</sup> BP was categorized using the JNC 7 Guideline (prehypertension: SBP of 120–139 mmHg and/or DBP of 80–89 mmHg, hypertension: SBP of  $\geq$ 140 mmHg and/or DBP of  $\geq$ 90 mmHg)

<sup>b</sup> BP was categorized using the 2017 ACC/AHA Guideline (normal BP = SBP <120 mmHg and DBP <80 mmHg, elevated BP = SBP 120-129 mmHg and DBP <80 mmHg, stage 1 hypertension = SBP 130-139 mmHg or DBP 80-89 mmHg, stage 2 hypertension = SBP  $\geq$ 140 mmHg or DBP  $\geq$ 90 mmHg)

<sup>c</sup> SUA, normal <5 mg/dL, high-normal = 5–7 mg/dL, and high  $\geq$ 7 mg/dL

Figure 2 shows the association between SUA and cardiovascular risk factors. The SUA levels were significantly associated with total cholesterol (p=0.001), LDL (p=0.002), HDL (p<0.001), triglycerides (p<0.001) and fasting blood glucose (p=0.030). Subjects with high-normal and high SUA levels had significantly higher total cholesterol, LDL, and triglyceride levels than subjects with normal SUA levels. On the other hand, HDL and fasting blood glucose were statistically lower among subjects with high-normal and high SUA levels than among those with normal SUA levels.

The relationships between SUA levels and cardiovascular risk factors among men and women are presented in Figure 3. In men, there were significant differences in BMI (p<0.001) and triglycerides (p=0.002) between subjects with normal SUA levels and those with high-normal and high SUA levels. In women, there was no significant differences in all cardiovascular risk factors (p>0.05) between subjects with normal SUA levels and those with high-normal and high SUA levels.

**Table 5.** Multiple Linear Regression of Association of Age, Cardiovascular Risk Factors and SUA on Blood Pressure

| Variables             | Blood Pressure of Men |         |               |         | Blood Pressure of Women |         |               |         |
|-----------------------|-----------------------|---------|---------------|---------|-------------------------|---------|---------------|---------|
|                       | Systolic              |         | Diastolic     |         | Systolic                |         | Diastolic     |         |
|                       | Coef. $\beta$         | p-value | Coef. $\beta$ | p-value | Coef. $\beta$           | p-value | Coef. $\beta$ | p-value |
| Age                   | 0.704                 | <0.001* | 0.336         | <0.001* | 0.674                   | <0.001* | -0.017        | 0.817   |
| SUA                   | -0.247                | 0.745   | 0.582         | 0.267   | 4.527                   | <0.001* | 2.223         | <0.001* |
| BMI                   | 1.602                 | <0.001* | 1.295         | <0.001* | 0.929                   | <0.001* | 0.722         | <0.001* |
| Total Cholesterol     | 0.044                 | 0.696   | 0.042         | 0.591   | 0.119                   | 0.279   | 0.030         | 0.643   |
| LDL                   | -0.074                | 0.529   | -0.036        | 0.657   | -0.102                  | 0.365   | -0.014        | 0.828   |
| HDL                   | 0.184                 | 0.174   | 0.042         | 0.653   | -0.054                  | 0.656   | -0.049        | 0.483   |
| Triglycerides         | -0.005                | 0.828   | -0.001        | 0.941   | -0.029                  | 0.280   | 0.006         | 0.721   |
| Fasting Blood Glucose | 0.032                 | 0.213   | -0.001        | 0.941   | 0.098                   | 0.001*  | 0.040         | 0.020*  |

\*Significant (p<0.05)

SUA=Serum uric acid, BMI=Body mass index, LDL=Low density lipoprotein, HDL=High density lipoprotein

Multivariable analysis was conducted to describe the association between SUA levels and BP, with adjustment for age and cardiovascular risk factors. Cardiovascular risk factors



1  
2  
3 249 such as BMI, total cholesterol, LDL, HDL, triglycerides, and fasting blood glucose were all  
4  
5 250 taken into account for adjustment in multiple linear regression (Table 5). Age, BMI, fasting  
6  
7  
8 251 blood glucose, and SUA levels were significantly associated with BP. Significant  
9  
10 252 associations were found between age and SBP both in men ( $p<0.001$ ) and women ( $p<0.001$ ),  
11  
12 253 and DBP only in men ( $p<0.001$ ). BMI was significantly associated with SBP and DBP both  
13  
14 254 in men ( $p<0.001$  and  $p<0.001$ ) and women ( $p<0.001$  and  $p<0.001$ ). In addition, fasting blood  
15  
16 255 glucose was found to be associated with SBP and DBP in women ( $p=0.001$  and  $p=0.020$ ).  
17  
18 256 Regarding SUA levels, SUA was significantly associated with both SBP and DBP in women  
19  
20 257 ( $p<0.001$  and  $p<0.001$ , respectively) but such association was not found in men.  
21  
22  
23  
24 258  
25  
26

## 27 259 **DISCUSSION**

28  
29  
30 260 This study consisted of two parts of data collection. The first data collection was  
31  
32 261 performed in 2007 to gather data on the prehypertension population ( $n=4,190$ ); this study was  
33  
34 262 later called the “Mlati Study Database”. In 2017, after 10 years, the second data collection  
35  
36 263 was performed to gather samples from the Mlati Study Database by a random sampling  
37  
38 264 method ( $n=733$ ) to show the change in BP status from prehypertension to hypertension. The  
39  
40 265 data collection in 2017 also aimed to show the association between uric acid (serum, urinary  
41  
42 266 excretion, and concentrate) and hypertension.  
43  
44  
45

46 267 The results of our study showed that gender and uric acid excretion (by 24-h urine)  
47  
48 268 were significantly associated with SUA levels. The mean SUA levels in men were  
49  
50 269 significantly higher than those in women. In addition, subjects with high-normal and high  
51  
52 270 SUA levels had a risk of having prehypertension and hypertension that was 1.12 times higher  
53  
54 271 than those with normal SUA levels. When analysed by gender, high-normal and high SUA  
55  
56 272 levels were significantly associated with prehypertension and hypertension only in women.  
57  
58  
59 273 The relationship between SUA levels and the development of hypertension or renal disease  
60



1  
2  
3 274 had been shown in several previous studies. This relationship was significantly higher in  
4  
5 275 women than in men.[15,25]  
6

7  
8 276 The study by Kawabe *et al.* revealed that in women, the older the age was, the higher  
9  
10 277 the quartile of SUA, but in men, the quartile of SUA did not increase with age. However, an  
11  
12 278 increase in the quartile of SUA along with higher BMI was only found in men but not in  
13  
14 279 women. Additionally, the mean value of SUA in men was higher than in women.[26] These  
15  
16 280 results were consistent with our finding that SUA levels were significantly higher in men and  
17  
18 281 that SUA levels were significantly associated with higher BMI in men. However, the study  
19  
20 282 populations in this study and the study by Kawabe *et al.* were different in terms of the age  
21  
22 283 group examined, which were adults (30–59 years old) and elderly adults, respectively.[26] A  
23  
24 284 similar finding was also found by Zhang, *et al.* which reported that SUA levels were  
25  
26 285 statistically higher in men than in women, though the SUA level did not increase with the age  
27  
28 286 both in men and women.[27] These studies' results were consistent with our finding which  
29  
30 287 stated that SUA level was significantly higher in men and SUA level was significantly  
31  
32 288 associated with higher BMI also in men. However, the study population in this study and the  
33  
34 289 study by Kawabe, *et al.* was different in the age group which was adults (30-59 years) and  
35  
36 290 elderly, respectively.  
37  
38  
39  
40

41  
42 291 Chen *et al.* reported a different result in a cross-sectional analysis regarding the  
43  
44 292 association between SUA levels and the presence of hypertension when analysed by gender.  
45  
46 293 For the total population, SUA levels had significant associations with hypertension. The  
47  
48 294 levels of SUA had a significant relationship with hypertension in men aged <30 years, 30–40  
49  
50 295 years, and >40 years but only in women aged >40 years.[10] This situation could be  
51  
52 296 explained in Table 3, which provides the age distribution of women and its association with  
53  
54 297 SUA levels. In Table 3, the proportion of women aged 40–49 years combined with those  
55  
56 298 aged 50–59 years having high-normal and high SUA levels was 24.6%. This age range in  
57  
58  
59  
60

1  
2  
3 299 women is associated with menopausal problems. A study by Hak *et al.* stated that menopause  
4  
5 300 was associated with an increased risk of incident gout, which may help explain why the age  
6  
7 301 of the women in this study could play a significant role in their SUA levels.[28]  
8  
9

10 302 Regarding the cardiovascular risk factors, the result of this study found that the SUA  
11  
12 303 levels were significantly associated with total cholesterol ( $p=0.001$ ), LDL ( $p=0.002$ ), HDL  
13  
14 304 ( $p<0.001$ ), triglycerides ( $p<0.001$ ) and fasting blood glucose ( $p=0.030$ ), regardless of gender.  
15  
16 305 When the data were analysed by gender, significant differences were found only in BMI and  
17  
18 306 triglycerides and only in men ( $p<0.001$  and  $p=0.002$ , respectively). Another study has shown  
19  
20 307 a stronger association between the increase of SUA level and cardiovascular mortality among  
21  
22 308 women in healthy subjects compared to men.[29] Meta-analysis showed that there was a  
23  
24 309 significant association between hyperuricemia and cardiovascular mortality in women, but  
25  
26 310 not in men.[30] Chen *et al.* reported that SUA levels were significantly associated with the  
27  
28 311 occurrence of metabolic syndrome and hypertension in the total population. In men, SUA  
29  
30 312 levels had a positive association with the occurrence of metabolic syndrome in the age groups  
31  
32 313 of  $<30$  and  $30-40$ . In women, SUA levels were significantly associated with the occurrence  
33  
34 314 of metabolic syndrome in the age groups of  $<30$  and  $>40$ .[10]  
35  
36  
37  
38  
39

40 315 In this study, BMI was significantly associated with SBP and DBP in both genders.  
41  
42 316 This finding was in line with those of a previous study by Droyvold *et al.*, in which the  
43  
44 317 authors reported that an increase in BMI was associated with increased BP in men and  
45  
46 318 women.[31] With regard to the association between BMI and SUA levels, our findings were  
47  
48 319 different from those of a report by Rodrigues *et al.*, in which the authors reported a  
49  
50 320 significant correlation between BMI and SUA levels in both men and women.[32] The link  
51  
52 321 between BMI and hyperuricemia has not been well elucidated; however, insulin resistance  
53  
54 322 might be the bridging gap. Obese people are more likely to have metabolic syndrome, and the  
55  
56 323 metabolic syndrome itself is associated with insulin resistance. It is thought that insulin  
57  
58  
59  
60

1  
2  
3 324 resistance impairs the ability of the kidney to excrete uric acid and therefore leads to  
4  
5 325 hyperuricemia.[33]  
6

7  
8 326 This study found that fasting blood glucose was associated with SBP and DBP only in  
9  
10 327 women. The same result was observed in a study by Yan *et al.*, which revealed that fasting  
11  
12 328 plasma glucose was independent of both SBP and DBP.[34] Fasting blood glucose was also  
13  
14 329 associated with SUA levels, but when analysed by gender, no significant difference was  
15  
16 330 found. This finding is contradictory to those of a study by Kawamoto *et al.*, which revealed  
17  
18 331 that SUA levels were associated with fasting plasma glucose in females.[35] The mechanism  
19  
20 332 of how this phenomenon occurred remains unclear, and further study is needed to observe a  
21  
22 333 cause-effect relationship. Serum triglycerides were also associated with SUA levels in this  
23  
24 334 study. The relationship between SUA levels and lipid profiles has been described in various  
25  
26 335 studies, but the exact mechanism remains unclear. A study by Peng *et al.* revealed that all  
27  
28 336 lipid profile parameters, including triglycerides but not HDL cholesterol, were associated  
29  
30 337 with SUA levels.[36] SUA levels were associated with both SBP and DBP but only in  
31  
32 338 women. This result is similar to those of previous studies.[35, 37] It has been suggested that  
33  
34 339 the mechanism by which uric acid causes hypertension is due to endothelial dysfunction after  
35  
36 340 oxidative stress damage to the endothelium during excessive uric acid formation.[37]  
37  
38  
39

40  
41  
42 341 There were several limitations to this study. First, subjects in this study were collected  
43  
44 342 from the database made in 2007. From 1500 subjects randomly selected at the beginning of  
45  
46 343 this study, only 733 subjects joined and attend the 2-days examination. More than half of the  
47  
48 344 selected subjects did not attend the examination invitation due to several reasons, thus, this  
49  
50 345 had lessened the total samples of subjects of this study. However, a total sample of 733 has  
51  
52 346 met the minimum sample requirement for this study based on sample size calculation (a  
53  
54 347 minimum sample size of 661 subjects are needed for this study). We invited 1500 subjects at  
55  
56 348 the beginning of this study to anticipate any subjects that could not participate in this study  
57  
58  
59  
60

1  
2  
3 349 due to any reasons, so that the minimum number of samples could still be met. This was one  
4  
5 350 of the difficulties we met since this study was a community-based study. The findings of this  
6  
7 351 study were expected to be generalized to the 4190 prehypertensive patients whom collected  
8  
9 352 from “Mlati Study” database in 2007. Second, this study could not present the changes of all  
10  
11 353 measured values over a 10-year period because, in the prior study in 2007, these laboratory  
12  
13 354 values were not examined, except for blood pressure. Therefore, only the changes in blood  
14  
15 355 pressure can be presented on the results. Third, the instruments used to measure blood  
16  
17 356 pressure in 2007 and 2017 were different that might cause instrument bias. In 2007, we used  
18  
19 357 sphygmomanometers, whereas in 2017 we used digital automatic blood pressure monitors.  
20  
21 358 Thus, this may lead to bias in blood pressure data measurement between 2007 and 2017.  
22  
23 359 Nevertheless, we tried to minimize the bias by calibrating both the sphygmomanometers and  
24  
25 360 digital automatic blood pressure monitors before data collection, so that, the blood pressure  
26  
27 361 data were all accurate.  
28  
29  
30  
31  
32

33 362

### 35 363 **CONCLUSION**

37 364 In conclusion, after 10 years of follow-up (2007-2017), of 733 prehypertensive  
38  
39 365 subjects, 180 (24.6%) returned to normal blood pressure, 325 (44.3%) remained in a  
40  
41 366 prehypertensive state, and 228 (31.1%) got hypertension. In the cross-sectional analyses of  
42  
43 367 SUA in 2017, the SUA levels in men were significantly higher than those in women.  
44  
45 368 Moreover, high-normal and high SUA levels were significantly associated with  
46  
47 369 prehypertension and hypertension in women but not in men.  
48  
49  
50

51 370

### 54 371 **ACKNOWLEDGMENTS**

55  
56 372 We would like to thank the Mlati Study Group, which assisted in this research. We would  
57  
58 373 also like to thank Prodia Laboratory for performing laboratory examinations.  
59  
60

1  
2  
3 374 **CONTRIBUTORS**  
4

5 375 LAB, MS and YT composed the idea of the study and arranged the study's design. MS, FI,  
6  
7 376 AW, and AK obtained the data. ZZ led the statistical analysis with the supervision of MS.  
8  
9 377 MS, LAB and ZZ wrote the first draft of this paper and all authors read, revised, and  
10  
11 378 approved the final manuscript.  
12  
13

14 379 **FUNDING**

15  
16  
17 380 This research was supported by the Mlati Study Group, Faculty of Medicine, University of  
18  
19 381 Gadjah Mada, Indonesia (No: MSG-008-2017).  
20

21 382 **COMPETING INTEREST**

22  
23  
24 383 There were no conflicts of interest to disclose.  
25

26 384 **DATA SHARING STATEMENT**

27  
28 385 Data may be obtained from the corresponding author upon reasonable request.  
29  
30  
31 386

32  
33 387 **REFERENCES**  
34  
35

- 36 388 1. Mills KT, Bundy JD, Kelly TN, *et al.* Global disparities of hypertension prevalence  
37  
38 389 and control: A systematic analysis of population-based studies from 90 countries.  
39  
40 390 *Circulation.* 2016; 134:441-50.  
41  
42  
43 391 2. Annual Health Research Report. Division of Research and Health Development:  
44  
45 392 Indonesian Ministry of Health. 2013.  
46  
47  
48 393 3. Ruchira P, Gajendra Singh M. PS 15-11 Impact of Hypertension on Quality of Life  
49  
50 394 among People Living in an Urban Area of Delhi, India. *J Hypertens* 2016; 34:e462.  
51  
52 395 doi: 10.1097/01.hjh.0000501221.33083.08  
53  
54  
55 396 4. de Carvalho MV, Siqueira LB, Sousa ALL, *et al.* The Influence of Hypertension on  
56  
57 397 Quality of Life. *Arq Bras Cardiol* 2013; 100(2):164-174. doi: 10.5935/abc.20130030  
58  
59  
60

- 1  
2  
3 398 5. Cicero AFG, Rosticci M, Fogacci F, *et al.* High Serum Uric Acid is Associated to  
4  
5 399 Poorly Controlled Blood Pressure and Higher Arterial Stiffness in Hypertensive  
6  
7 400 Subjects. *Eur J Int Med* 2017; 37:38–42.
- 8  
9  
10 401 6. Jin M, Yang F, Yang I, *et al.* Uric Acid, Hyperuricemia and Vascular Diseases. *Front*  
11  
12 402 *Biosci* 2012; 17:656–69.
- 13  
14 403 7. Grayson PC, Kim SY, LaValley M, *et al.* Hyperuricemia and Incident Hypertension:  
15  
16 404 A Systematic Review and Meta-analysis. *Arthritis Care Res* 2011; 63:102–10.
- 17  
18 405 8. Sundström J, Sullivan L, D’Agostino RB, *et al.* Relations of Serum Uric Acid to  
19  
20 406 Longitudinal Blood Pressure Tracking and Hypertension Incidence. *Hypertens* 2005;  
21  
22 407 45:28-33
- 23  
24 408 9. Jiang M, Gong D, Fan Y. Serum uric acid levels and risk of prehypertension: a meta-  
25  
26 409 analysis. *Clin Chem Lab Med.* 2016; DOI:10.1515.
- 27  
28 410 10. Chen YY, Kao TW, Yang HF, *et al.* The Association of Uric Acid with The Risk of  
29  
30 411 Metabolic Syndrome, Arterial Hypertension or Diabetes in Young Subjects - An  
31  
32 412 Observational Study. *Clin Chim Acta* 2018; 48:68-73.
- 33  
34 413 11. Ali N, Mahmood S, Islam F, *et al.* Relationship between Serum Uric Acid and  
35  
36 414 Hypertension: A Cross-sectional Study in Bangladeshi Adults. *Sci Rep* 2019; 9:9061.  
37  
38 415 <https://doi.org/10.1038/s41598-019-45680-4>
- 39  
40 416 12. Chen Q, Yin YJ, Chen WY, *et al.* Assessment of The Association between Serum  
41  
42 417 Uric Acid Levels and The Incidence of Hypertension in Nonmetabolic Syndrome  
43  
44 418 Subjects: A prospective Observational Study. *Medicine* 2018; 97:6.
- 45  
46 419 13. Lin X, Wang X, Li X, *et al.* Gender- and Age-Specific Differences in The  
47  
48 420 Association of Hyperuricemia and Hypertension: A Cross-Sectional Study. *Int J*  
49  
50 421 *Endocrinol* 2019; <https://doi.org/10.1155/2019/7545137>
- 51  
52  
53  
54  
55  
56  
57  
58  
59  
60

- 1  
2  
3 422 14. Nishio S, Maruyama Y, Sugano N, *et al.* Gender Interaction of Uric Acid in the  
4  
5 423 Development of Hypertension. *Clin Exp Hypertens* 2018; 40(5):446-451,  
6  
7 424 <https://doi.org/10.1080/10641963.2017.1392556>  
8  
9  
10 425 15. Lee JJ, Ahn JH, Hwang JS, *et al.* Relationship between uric Acid and Blood Pressure  
11  
12 426 in Different Age Groups. *Clin Hypertens* 2015; 21:14, DOI 10.1186/s40885-015-  
13  
14 427 0022-9  
15  
16 428 16. Culleton BF, Larson MG, Kannel WB, *et al.* Serum Uric Acid and Risk for  
17  
18 429 Cardiovascular Disease and Death: The Framingham Heart Study. *Ann Intern Med*  
19  
20 430 1999; 131:7-13  
21  
22 431 17. Chang CC, Wu CH, Liu LK, *et al.* Association between Serum Uric Acid and  
23  
24 432 Cardiovascular Risk in Nonhypertensive and Nondiabetic Individuals: The Taiwan I-  
25  
26 433 Lan Longitudinal Aging Study. *Sci Rep* 2018; 8:5234, DOI:10.1038/s41598-018-  
27  
28 434 22997-0  
29  
30 435 18. Høiegggen A, Alderman MH, Kjeldsen SE, *et al.* The Impact of Serum uric Acid on  
31  
32 436 Cardiovascular Outcomes in LIFE Study. *Kidney Int* 2004; 65:1041-1049  
33  
34 437 19. Borghi C, Rodriguez-Artalejo F, De Backer G, *et al.* Serum Uric Acid Levels are  
35  
36 438 Associated with Cardiovascular Risk Score: A Post hoc Analysis of the EURIKA  
37  
38 439 Study. *Int J of Cardiol* 2018; 253:167-173  
39  
40 440 20. Rahimi-Sakak F, Maroofi M, Rahmani J, *et al.* Serum Uric Acid and Risk of  
41  
42 441 Cardiovascular Mortality: A Systematic Review and Dose-response Meta-analysis of  
43  
44 442 Cohort Studies of over a Million Participants. *BMC Cardiovasc Disord* 2019; 19:218,  
45  
46 443 <https://doi.org/10.1186/s12872-019-1215-z>  
47  
48 444 21. Chobanian AV, Bakris GL, Black HR, *et al.* The Seventh Report of The JNC on  
49  
50 445 Prevention, Detection and Treatment of High Blood Pressure: The JNC 7 Report. *J*  
51  
52 446 *Am Med Assoc* 2003; 289(19): 2560-72.  
53  
54  
55  
56  
57  
58  
59  
60



- 1  
2  
3 447 22. Whelton PK, Carey RM, Aronow WS, *et al.* 2017 ACC/AHA/AAPA/ABC/ACPM/  
4  
5 448 AGS/APhA/ASH/ASPC/NMA/PCNA Guideline for the Prevention, Detection,  
6  
7 449 Evaluation, and Management of High Blood Pressure in Adults: Executive Summary.  
8  
9 450 A Report of the American College of Cardiology/American Heart Association Task  
10  
11 451 Force on Clinical Practice Guidelines. *Hypertension* 2018; 71(6):1269-1324.
- 12  
13  
14 452 23. Sja'bani M. Hypertension and Renoprotective Effects of High Serum Uric Acid  
15  
16 453 Treatment. In Annual Scientific Meeting of Indonesian Nephrology in Palembang.  
17  
18 454 South Sumatra, Indonesia: Lembaga Penerbit Ilmu Penyakit Dalam, Bagian Ilmu  
19  
20 455 Penyakit Dalam Fakultas Kedokteran UNSRI, Palembang. 2014.
- 21  
22  
23 456 24. IBM Corp. Released 2013. IBM SPSS Statistics for Windows, Version 22.0. Armonk,  
24  
25 457 NY: IBM Corp
- 26  
27  
28 458 25. Zhang W, Sun K, Yang Y, *et al.* Plasma Uric Acid and  
29  
30 459 Hypertension in a Chinese Community: Prospective Study and Meta-Analysis. *Clin*  
31  
32 460 *Chem* 2009; 55:2026–34.
- 33  
34  
35 461 26. Kawabe M, Sato A, Hoshi T, *et al.* Gender Differences in The Association Between  
36  
37 462 Serum Uric Acid and Prognosis in Patients with Acute Coronary Syndrome. *J Cardiol*  
38  
39 463 2016; 67:170–176.
- 40  
41  
42 464 27. Zhang C, Liu R, Yuan J, *et al.* Gender-related Differences in The Association  
43  
44 465 between Serum Uric Acid and Left Ventricular Mass Index in Patients with  
45  
46 466 Obstructive Hypertrophic Cardiomyopathy. *Biol Sex Differ* 2016; 7:22.
- 47  
48  
49 467 28. Hak AE, Curhan GC, Grodstein F, *et al.* Menopause, post-menopausal hormone use  
50  
51 468 and risk of incident gout. *Ann Rheum Dis* 2010;69(7):1305-9.
- 52  
53  
54 469 29. Freedman DS, Williamson DF, Gunter EW, *et al.* Relation of serum uric acid to  
55  
56 470 mortality and ischemic heart disease. The NHANES I Epidemiologic Followup Study.  
57  
58 471 *Am J Epidemiol* 1995; 141:637–44.
- 59  
60



- 1  
2  
3 472 30. Kim SY, Guevara JP, Kim KM, *et al.* Hyperuricemia and coronary heart disease: a  
4  
5 473 systematic review and meta-analysis. *Arthritis Care Res (Hoboken)* 2010; 62:170–80.  
6  
7  
8 474 31. Droyvold WB, Midtjhell K, Nilsen TIL, *et al.* Change in Body Mass Index and Its  
9  
10 475 Impact on Blood Pressure: A Prospective Population Study. *Int J Obes.* 2005; 29:650-  
11  
12 476 655.  
13  
14  
15 477 32. Rodrigues SL, Baldo MP, Cappingana DP, *et al.* Gender Difference of Serum Uric  
16  
17 478 Acid and Cardiovascular Risk Factors: Population Based Study. *Arq Bras Cardiol.*  
18  
19 479 2011.  
20  
21  
22 480 33. Li C, Hsieh MC, Chang SJ. Metabolic Syndrome, Diabetes, and Hyperuricemia. *Curr*  
23  
24 481 *Opin Rheumatol.* 2013; 25:210-216.  
25  
26 482 34. Yan Q, Sun D, Li X, *et al.* Association of Blood Glucose Level and Hypertension in  
27  
28 483 Elderly Chinese Subjects: A Community Based Study. *BMC Endocr Disord.* 2016;  
29  
30 484 16:40.  
31  
32  
33 485 35. Kawamoto R, Tabara Y, Kohara K, *et al.* Serum Uric Acid is More Strongly  
34  
35 486 Associated with Impaired Fasting Blood Glucose in Women Than in Men From A  
36  
37 487 Community-Dwelling Population. *PLoS One.* 2013; 8(6):1-5.  
38  
39  
40 488 36. Peng TC, Wang CC, Kao TW, *et al.* Relationship between Hyperuricemia and Lipid  
41  
42 489 Profiles in US Adults. *BioMed Res Int.* 2015.  
43  
44  
45 490 37. Maruhashi T, Nakashima A, Soga J, *et al.* Hyperuricemia is Independently Associated  
46  
47 491 with Endothelial Dysfunction in Post-Menopausal Women but not in Pre-Menopausal  
48  
49 492 Women. *BMJ Open.* 2013; 3:e003659.  
50  
51  
52 493  
53  
54 494  
55  
56 495  
57  
58  
59  
60

1  
2  
3 **496 Figure Legend**  
4

5  
6 497 Figure 1. Data collection was conducted twice in 2007 (resulting in a collection of  
7  
8 498 prehypertensive population of 4190 patients) and 2017 (to collect the study sample of 733  
9  
10 499 and obtained physical and laboratory examinations data)

11  
12 500 Figure 2. The SUA/serum uric acid levels were significantly associated with total cholesterol  
13  
14 501 (p=0.001), LDL/low density lipoprotein (p=0.002), HDL/high density lipoprotein (p<0.001),  
15  
16 502 triglycerides (p<0.001) and fasting blood glucose (p=0.030). The SUA category: normal (<5  
17  
18 503 mg/dL), high-normal (5–7 mg/dL), and high ( $\geq$ 7 mg/dL).

19  
20  
21 504 Figure 3. Significant differences were found in BMI (p<0.001) and triglycerides (p=0.002)  
22  
23 505 between subjects with normal SUA levels and those with high-normal and high SUA levels in  
24  
25 506 men. No significant difference was found (p>0.05) between subjects with normal SUA levels  
26  
27 507 and those with high-normal and high SUA levels in women. The SUA category: normal (<5  
28  
29 508 mg/dL), high-normal (5–7 mg/dL), and high ( $\geq$ 7 mg/dL).  
30  
31  
32

33 509  
34  
35  
36  
37  
38  
39  
40  
41  
42  
43  
44  
45  
46  
47  
48  
49  
50  
51  
52  
53  
54  
55  
56  
57  
58  
59  
60



Fig 1. Study Flow Chart

Fig 1. Study Flow Chart

210x297mm (300 x 300 DPI)



**Fig. 2.** Mean of cardiovascular risk factors in different serum uric acid levels  
 The SUA/serum uric acid levels were significantly associated with total cholesterol ( $p=0.001$ ), LDL/low density lipoprotein ( $p=0.002$ ), HDL/high density lipoprotein ( $p<0.001$ ), triglycerides ( $p<0.001$ ) and fasting blood glucose ( $p=0.030$ ).

Figure 2. Mean of cardiovascular risk factors in different serum uric acid levels

210x297mm (300 x 300 DPI)

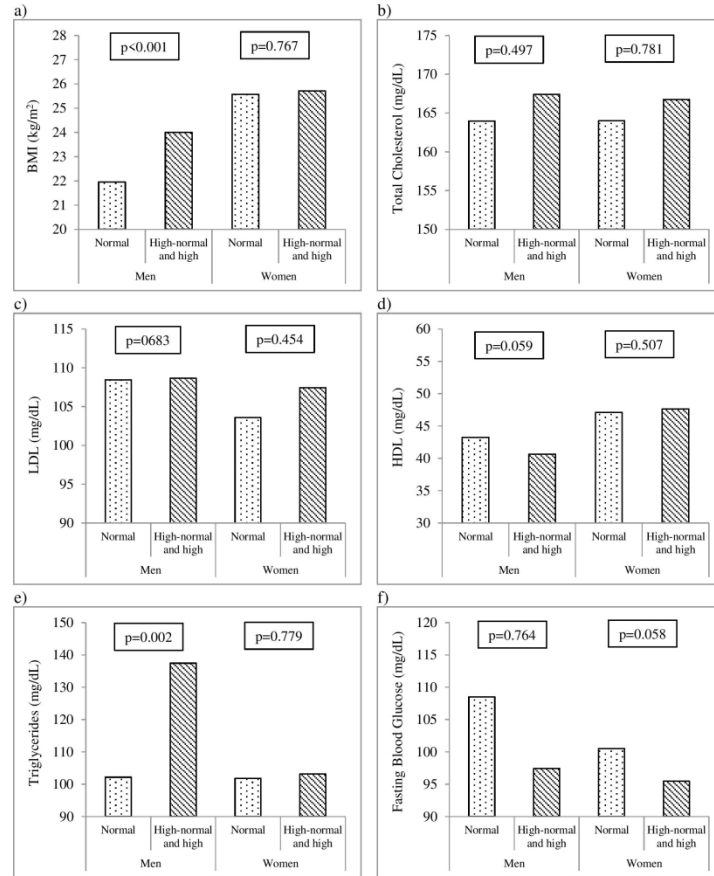

**Fig. 3.** Mean of cardiovascular risk factors in men and women between normal and high-normal/high SUA levels. In men, BMI, LDL, triglyceride and fasting blood glucose values were analysed using the Mann-Whitney U test; total cholesterol and HDL levels were analysed using independent samples t-tests. In women, BMI, total cholesterol, LDL, HDL and triglyceride levels were analysed using the Mann-Whitney U test; fasting blood glucose was analysed using independent samples t-tests.

Figure 3. Mean of cardiovascular risk factors in men and women between normal and high-normal/high SUA levels.

210x297mm (300 x 300 DPI)

**STROBE 2007 (v4) Statement—Checklist of items that should be included in reports of *cross-sectional studies***

| Section/Topic                | Item # | Recommendation                                                                                                                                                                       | Reported on page # |
|------------------------------|--------|--------------------------------------------------------------------------------------------------------------------------------------------------------------------------------------|--------------------|
| <b>Title and abstract</b>    | 1      | (a) Indicate the study's design with a commonly used term in the title or the abstract                                                                                               | 2                  |
|                              |        | (b) Provide in the abstract an informative and balanced summary of what was done and what was found                                                                                  | 2                  |
| <b>Introduction</b>          |        |                                                                                                                                                                                      |                    |
| Background/rationale         | 2      | Explain the scientific background and rationale for the investigation being reported                                                                                                 | 3                  |
| Objectives                   | 3      | State specific objectives, including any prespecified hypotheses                                                                                                                     | 4                  |
| <b>Methods</b>               |        |                                                                                                                                                                                      |                    |
| Study design                 | 4      | Present key elements of study design early in the paper                                                                                                                              | 5                  |
| Setting                      | 5      | Describe the setting, locations, and relevant dates, including periods of recruitment, exposure, follow-up, and data collection                                                      | 5                  |
| Participants                 | 6      | (a) Give the eligibility criteria, and the sources and methods of selection of participants                                                                                          | 5                  |
| Variables                    | 7      | Clearly define all outcomes, exposures, predictors, potential confounders, and effect modifiers. Give diagnostic criteria, if applicable                                             | 8                  |
| Data sources/<br>measurement | 8*     | For each variable of interest, give sources of data and details of methods of assessment (measurement). Describe comparability of assessment methods if there is more than one group | 6                  |
| Bias                         | 9      | Describe any efforts to address potential sources of bias                                                                                                                            | 17-18              |
| Study size                   | 10     | Explain how the study size was arrived at                                                                                                                                            | 5                  |
| Quantitative variables       | 11     | Explain how quantitative variables were handled in the analyses. If applicable, describe which groupings were chosen and why                                                         | 8                  |
| Statistical methods          | 12     | (a) Describe all statistical methods, including those used to control for confounding                                                                                                | 8                  |
|                              |        | (b) Describe any methods used to examine subgroups and interactions                                                                                                                  | 8                  |
|                              |        | (c) Explain how missing data were addressed                                                                                                                                          | N/A                |
|                              |        | (d) If applicable, describe analytical methods taking account of sampling strategy                                                                                                   | N/A                |
|                              |        | (e) Describe any sensitivity analyses                                                                                                                                                |                    |
| <b>Results</b>               |        |                                                                                                                                                                                      |                    |

|                          |     |                                                                                                                                                                                                              |                       |
|--------------------------|-----|--------------------------------------------------------------------------------------------------------------------------------------------------------------------------------------------------------------|-----------------------|
| Participants             | 13* | (a) Report numbers of individuals at each stage of study—eg numbers potentially eligible, examined for eligibility, confirmed eligible, included in the study, completing follow-up, and analysed            | Figure 1              |
|                          |     | (b) Give reasons for non-participation at each stage                                                                                                                                                         | N/A                   |
|                          |     | (c) Consider use of a flow diagram                                                                                                                                                                           | Figure 1              |
| Descriptive data         | 14* | (a) Give characteristics of study participants (eg demographic, clinical, social) and information on exposures and potential confounders                                                                     | 9                     |
|                          |     | (b) Indicate number of participants with missing data for each variable of interest                                                                                                                          | N/A                   |
| Outcome data             | 15* | Report numbers of outcome events or summary measures                                                                                                                                                         | 8                     |
| Main results             | 16  | (a) Give unadjusted estimates and, if applicable, confounder-adjusted estimates and their precision (eg, 95% confidence interval). Make clear which confounders were adjusted for and why they were included | 10-14                 |
|                          |     | (b) Report category boundaries when continuous variables were categorized                                                                                                                                    | Written on each table |
|                          |     | (c) If relevant, consider translating estimates of relative risk into absolute risk for a meaningful time period                                                                                             | N/A                   |
| Other analyses           | 17  | Report other analyses done—eg analyses of subgroups and interactions, and sensitivity analyses                                                                                                               | N/A                   |
| <b>Discussion</b>        |     |                                                                                                                                                                                                              |                       |
| Key results              | 18  | Summarise key results with reference to study objectives                                                                                                                                                     | 14                    |
| Limitations              | 19  | Discuss limitations of the study, taking into account sources of potential bias or imprecision. Discuss both direction and magnitude of any potential bias                                                   | 17                    |
| Interpretation           | 20  | Give a cautious overall interpretation of results considering objectives, limitations, multiplicity of analyses, results from similar studies, and other relevant evidence                                   | 14-17                 |
| Generalisability         | 21  | Discuss the generalisability (external validity) of the study results                                                                                                                                        | 18                    |
| <b>Other information</b> |     |                                                                                                                                                                                                              |                       |
| Funding                  | 22  | Give the source of funding and the role of the funders for the present study and, if applicable, for the original study on which the present article is based                                                | 19                    |

\*Give information separately for cases and controls in case-control studies and, if applicable, for exposed and unexposed groups in cohort and cross-sectional studies.

**Note:** An Explanation and Elaboration article discusses each checklist item and gives methodological background and published examples of transparent reporting. The STROBE checklist is best used in conjunction with this article (freely available on the Web sites of PLoS Medicine at <http://www.plosmedicine.org/>, Annals of Internal Medicine at <http://www.annals.org/>, and Epidemiology at <http://www.epidem.com/>). Information on the STROBE Initiative is available at [www.strobe-statement.org](http://www.strobe-statement.org).
